# Supplementary material
Source: publisher figshare collection journal article supplement (https://gsapubs.figshare.com/articles/dataset/_/12869849)
Supplement: Supplementary file 1 [file 2]

Jones, M.M., Sageman, B.B., Selby, D., Jicha, B.R., Singer, B.S., and Titus, A.L., 2020, Regional chronostratigraphic synthesis of the Cenomanian-Turonian Oceanic Anoxic Event 2 (OAE2) interval, Western Interior Basin (USA): New Re-Os chemostratigraphy and  $^{40}\text{Ar}/^{39}\text{Ar}$  geochronology: GSA Bulletin, <https://doi.org/10.1130/B35594.1>.

## Supplemental Material

### $^{40}\text{Ar}/^{39}\text{Ar}$ geochronology

**Figure S1:** Rank order plots of Ar data

**Figure S2:** Ar single crystal sanidine fusion data

### Kaiparowits Plateau transect

**Figure S3:** Correlation of Kaiparowits sites and Portland Core, Colorado

### Cenomanian-Turonian boundary age estimates

**Table S1:** CTB ages calculations

### Base OAE2 hiatus in Portland Core

**Figure S4:** Magnified OAE2 onset interval in Portland and SH#1 cores

### Angus Core depth scale correction

**Table S2:** Coulometric data from Angus Core OAE2 interval

**Table S3:** Corrected Angus Core depths OAE2 interval

### Comparison of OAE2 time scales from the central Western Interior Basin and Eagle Ford Group (Texas)

**Figure S5:** Comparison of floating astronomically-tuned geochemical timeseries

### Complete Ar results

**Table S4:** Complete  $^{40}\text{Ar}/^{39}\text{Ar}$  results

**Table S5:** Complete Ar data for samples 90-O-34 and K-07-01C

### Supplementary References

### <sup>40</sup>Ar/<sup>39</sup>Ar Geochronology

Single crystal incremental heating experiments were performed on sanidine from samples NC-B, -C, and -D. Rank order plots of these results are shown in Fig. S1. Single crystal total fusion experiments were performed on samples K-07-01C and 90-O-34 (Fig. S2). Complete Ar isotope data for all experiments are provided in Tables S4 and S5.

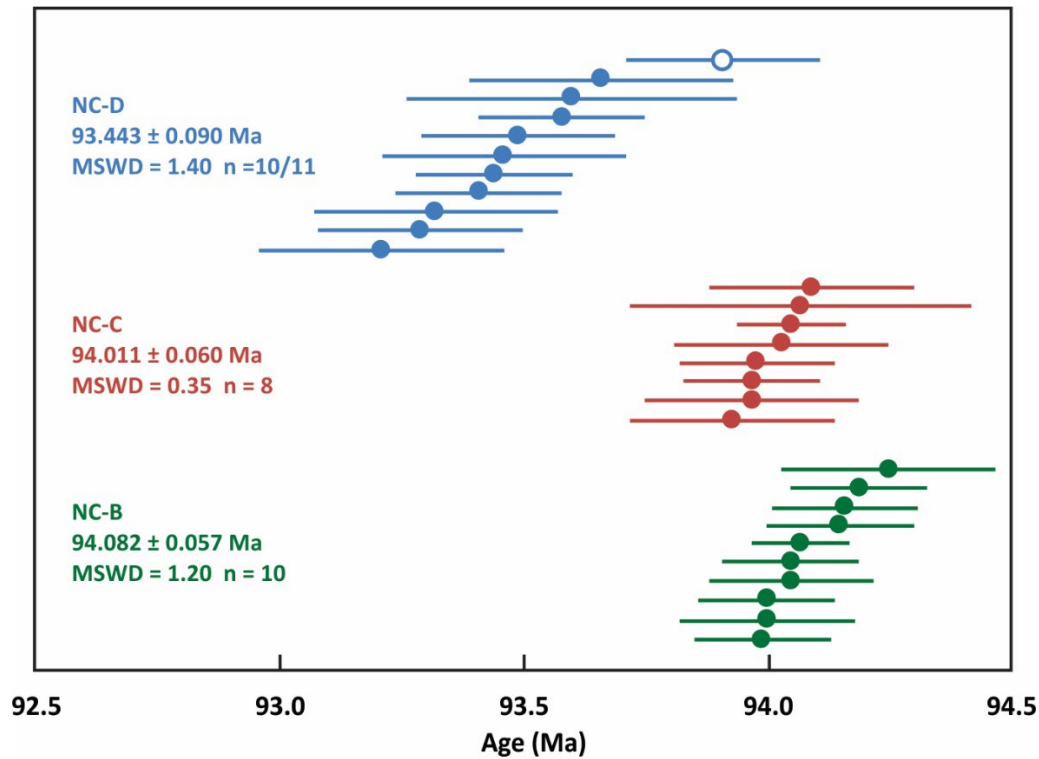

**Figure S1.** Rank order plot showing single sanidine <sup>40</sup>Ar/<sup>39</sup>Ar plateau ages for NC-B (green), NC-C (red), and NC-D (blue) bentonites. Individual plateau and weighted mean ages are shown with 2σ uncertainties that include J uncertainty. White data points have been excluded from weighted mean calculations. For complete data see Table S4.

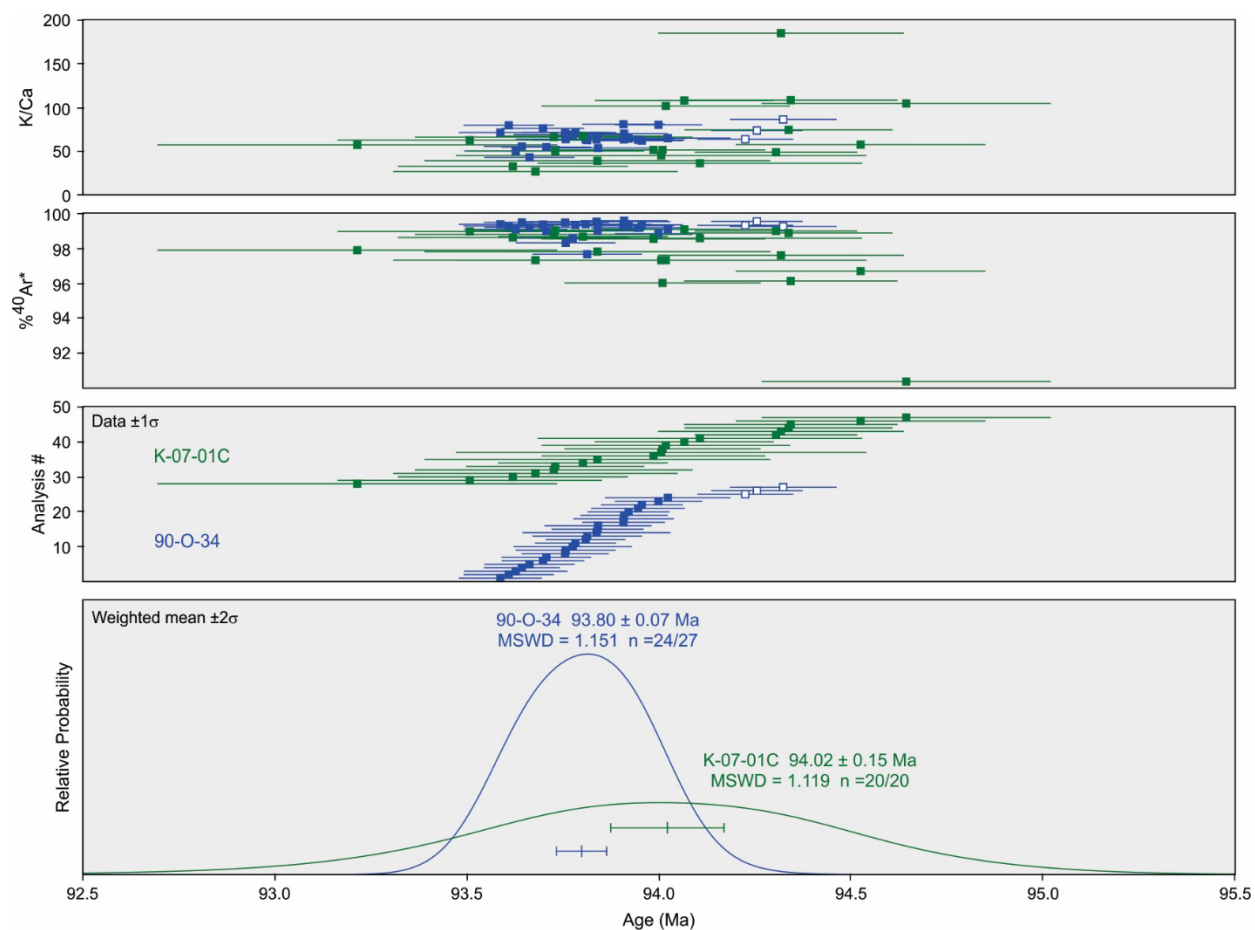

**Figure S2.**  $^{40}\text{Ar}/^{39}\text{Ar}$  single crystal sanidine total fusion data for K-07-01C (green) and 90-O-34 (blue). Data shown as plots of A) K/Ca and B) % radiogenic  $^{40}\text{Ar}$  (% $^{40}\text{Ar}^*$ ) vs. Age (Ma), as well as C) rank order plots of each sample and D) probability density curves of each dataset. Dates are shown with  $1\sigma$  analytical uncertainties. Weighted mean ages are shown with  $2\sigma$  uncertainties that include J uncertainty. White datapoints have been excluded from weighted mean calculations. For complete data see Table S5.

## Nipple Creek section

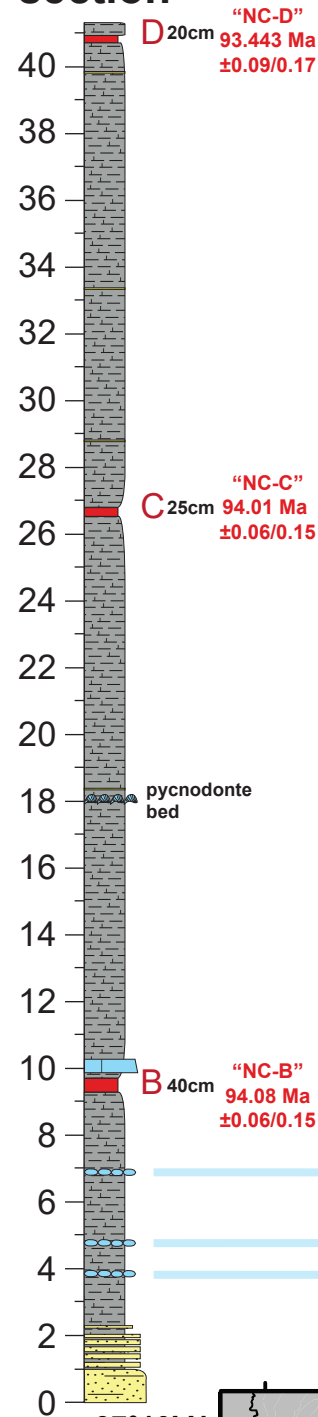

## Wahweap Wash section

Section by R.M. Leckie and E.L. Leithold

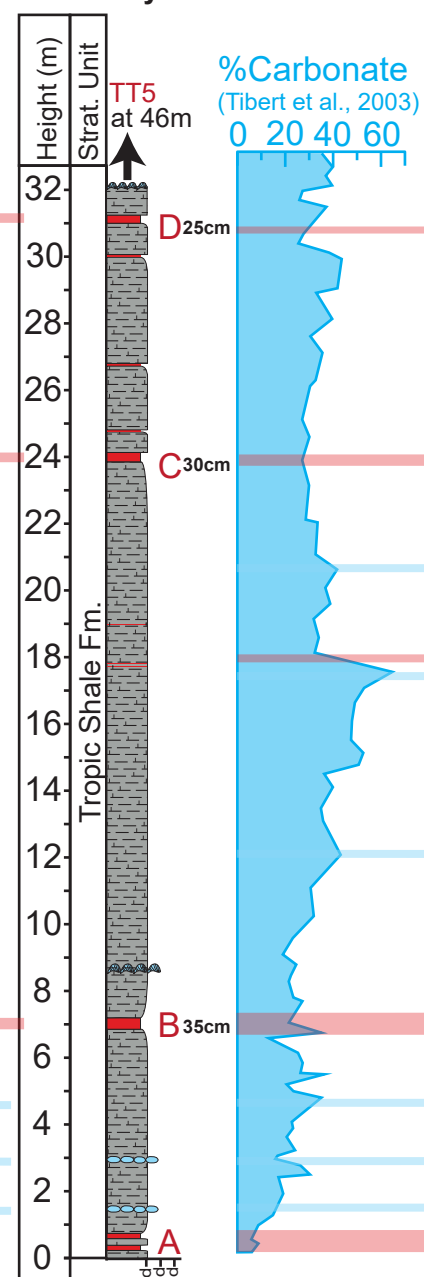

## SH#1 Core

updated from Jones et al. (2019)

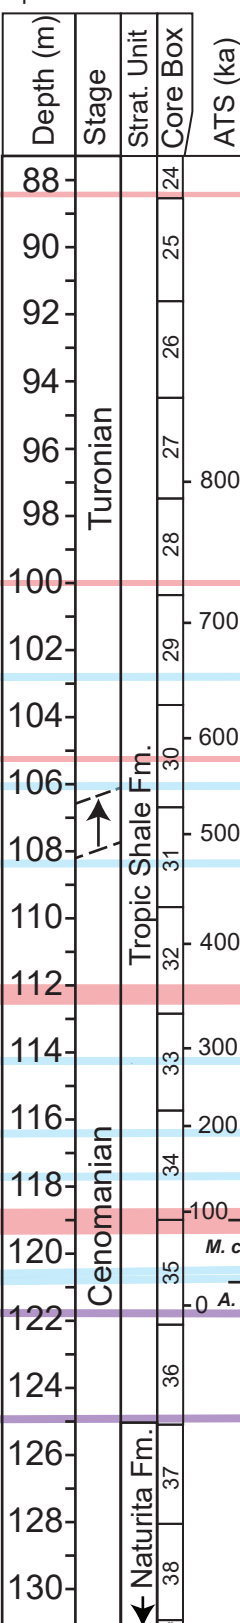

## KPS1-2

updated from Jones et al. (2019)

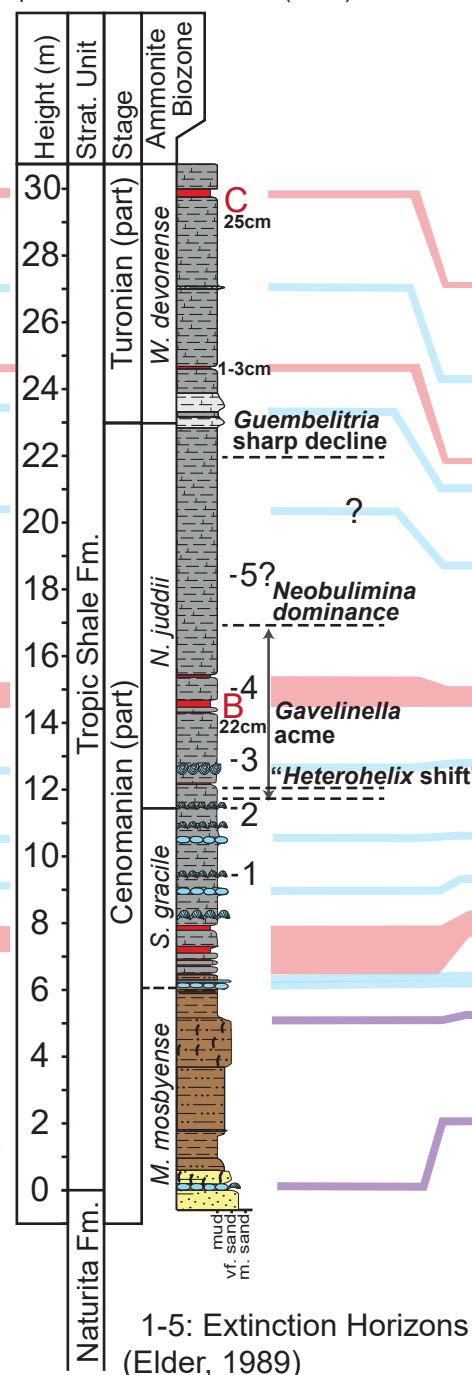

1-5: Extinction Horizons  
(Elder, 1989)

## Lithologies

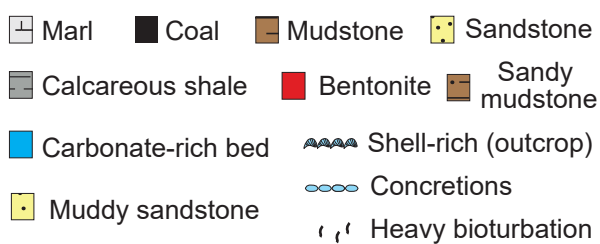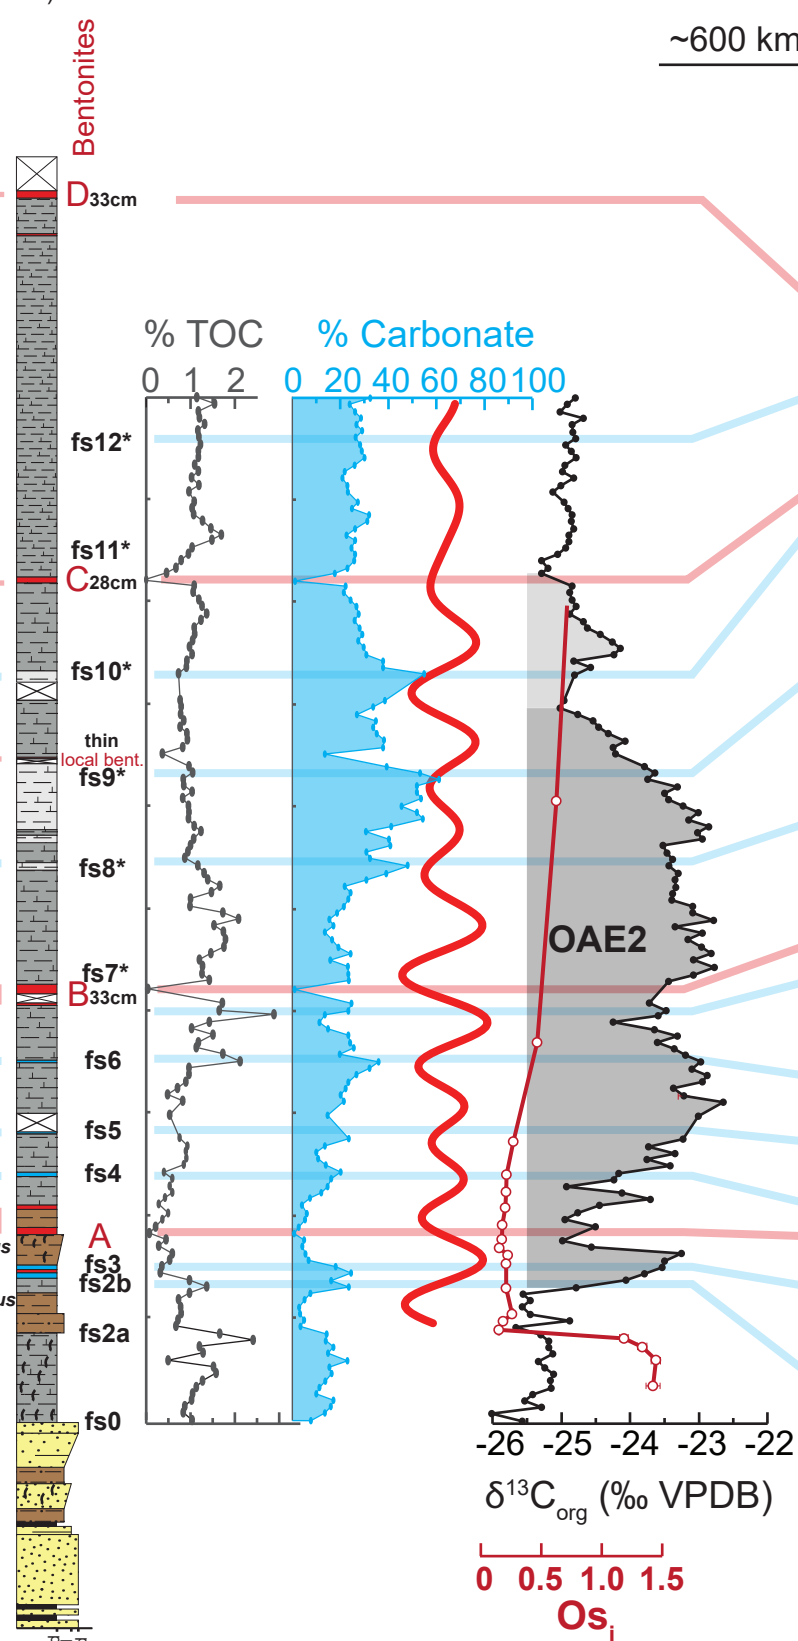

# Portland Core

(near Pueblo, CO

base Turonian GSSP)

### Short eccentricity bandpass

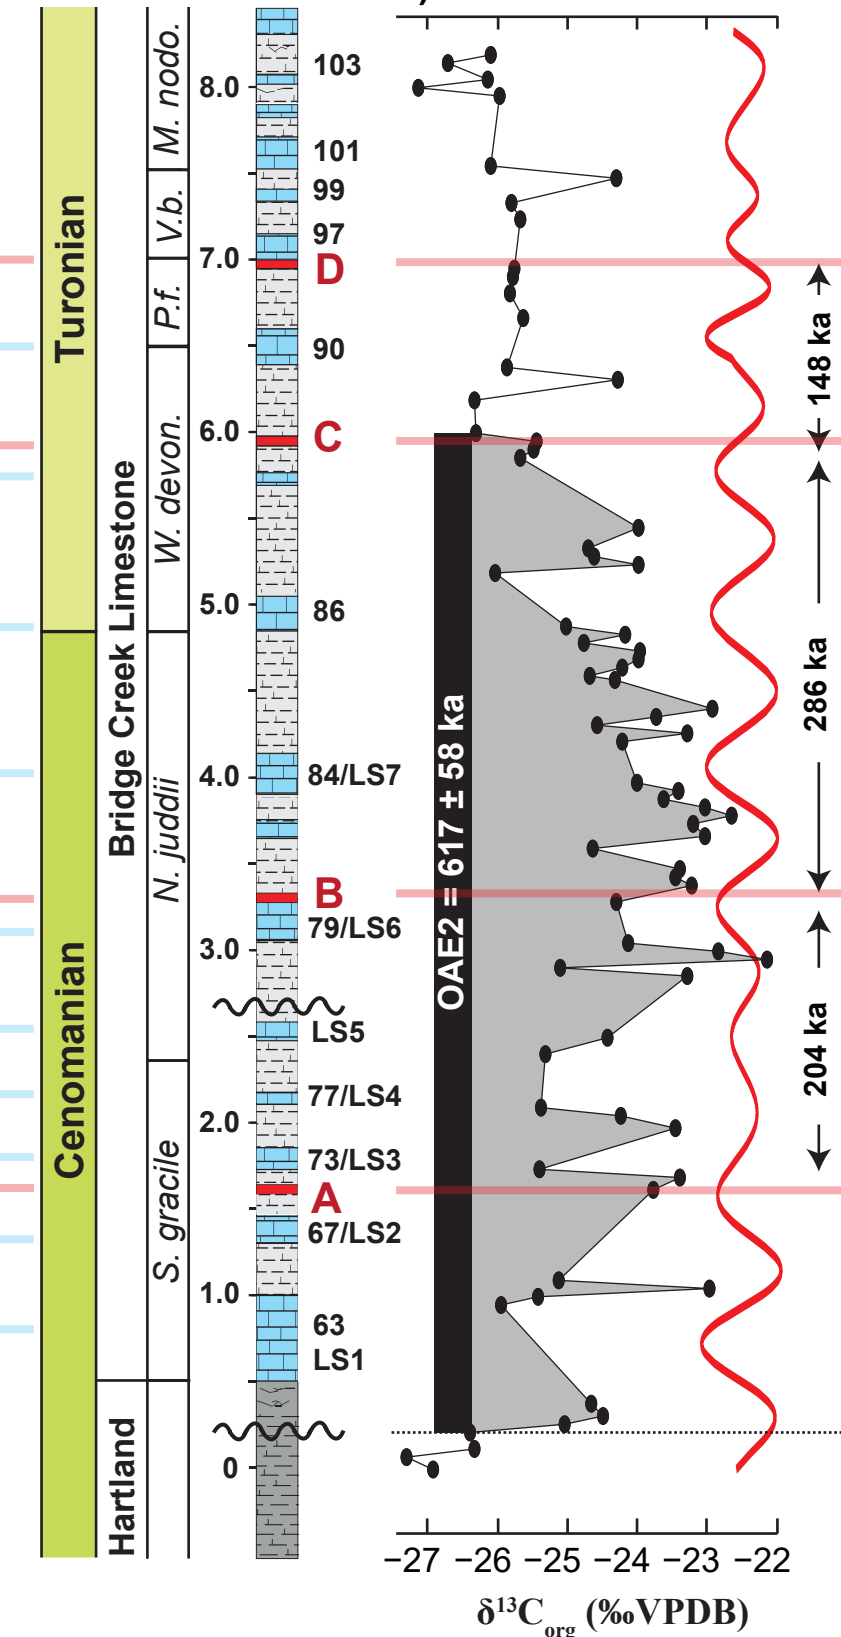

Portland Core data redrafted from Meyers et al. (2012)

### Equivalent scaling of depth at all sites except Portland Core

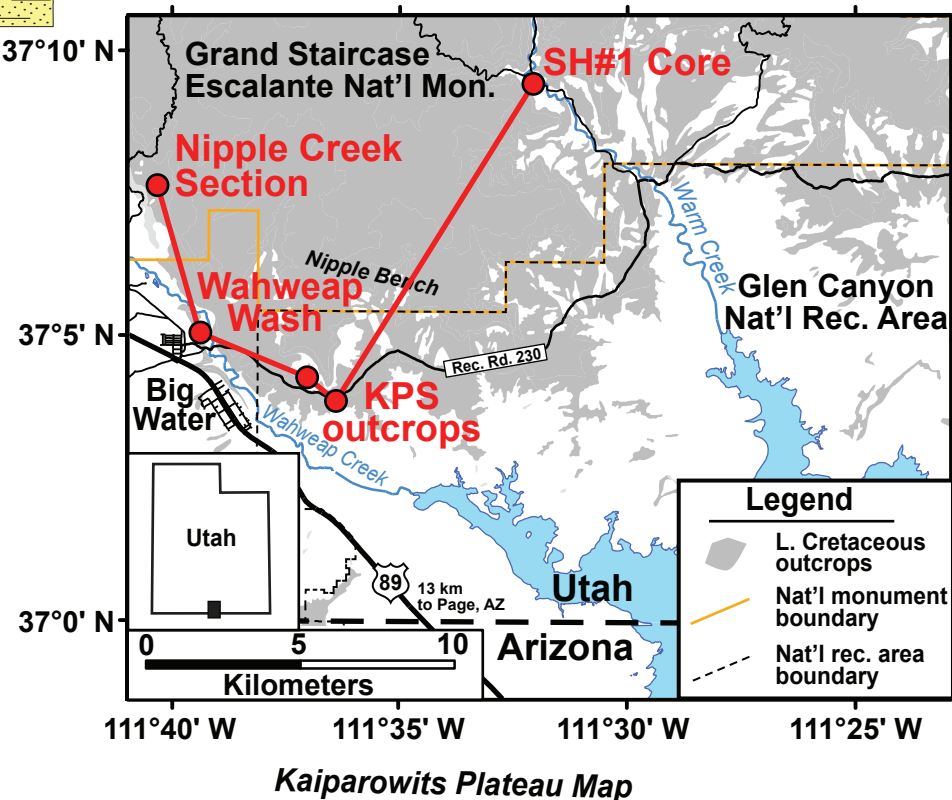

**Figure S3.** A stratigraphic correlation of four Cenomanian-Turonian boundary (CTB) interval sites along the Kaiparowits Plateau of southern Utah, USA (near Big Water) to the Portland Core near the base Turonian GSSP in Pueblo, Colorado, USA. For this study, three bentonite samples were measured from the Nipple Creek section for  $^{40}\text{Ar}/^{39}\text{Ar}$  geochronology (Fig. S1 and Table S1) and an initial osmium isotope ( $\text{Os}_i$ ) chemostratigraphy was measured for the SH#1 Core. Note the NC-D bentonite date is considered an outlier measurement in this study (see Discussion). The CTB interval bentonites A-D (Elder, 1988) are correlated regionally (red) along with flooding surfaces and limestone bed pairs in light blue (*sensu* Elder et al., 1994). Ammonite biostratigraphy and bentonite correlations for the KPS1-2 sections and the SH#1 Core are updated from Jones et al. (2019). The placements of bentonites C and D are now stratigraphically higher than in Jones et al. (2019) based on regional correlation and comparison of bentonite thicknesses at the Nipple Creek and Wahweap Wash sections. Carbonate content trends in Wahweap Wash section (Tibert et al., 2003) and in the SH#1 Core (Jones et al., 2019) also constrain correlations. Additionally, the CTB is now placed at 106.4m in the SH#1 Core based on this revised correlation to the KPS1-2 outcrop and bed 86 at the base Turonian GSSP (right). Ammonite subzones of *W. devonense* Biozone (i.e., *Pseudaspidoceras flexuosum* – *P.f.*, *Vascoceras birchbyi* – *V.b.*) are not plotted in KPS1-2. The Portland Core stratigraphic column and short eccentricity bandpass filter are redrafted from Meyers et al. (2012) and  $\delta^{13}\text{C}_{\text{org}}$  data is from Sageman et al. (2006). Bentonite correlation to the Portland core permits anchoring of the ATS, represented by red short-eccentricity bandpass filter, to radioisotopic ages so that the age of the Cenomanian-Turonian boundary and base of the Turonian Stage can be obtained.

## Cenomanian-Turonian Boundary Age Estimates

We calculate ages for the Cenomanian-Turonian boundary (CTB) by anchoring the floating astronomical time scale (ATS) of the Portland Core (Meyers et al., 2001) to the various new and recently measured  $^{40}\text{Ar}/^{39}\text{Ar}$  and U/Pb dates for bentonites B, C and D in the Western Interior Basin (Table S1). The base of the Turonian Stage is defined at the global boundary stratotype section and point (GSSP) at Rock Canyon Anticline in Pueblo, Colorado, USA by the first occurrence (F.O.) of ammonite *Watinoceras devonense* at the base of limestone Bed 86 (Kennedy et al., 2000; 2005). Bed labels at the GSSP section derive from the designations of Cobban and Scott (1972) and Elder and Kirkland (1985), and include the regional bentonites A, B, C, and D found in the CTB interval across much of the Western Interior Basin (Elder, 1988). The USGS no. 1 Portland Core, drilled 30 km NW of the GSSP, preserves bentonite beds and limestone-marlstone couplets that correlate to the GSSP section (Sageman et al., 2006) and to southern Utah (Fig. S3). The core has been studied in detail, for example, to measure carbon and initial osmium isotope chemostratigraphy, as well as to develop an ATS through the CTB interval (Meyers et al., 2001; Meyers and Sageman, 2004; Sageman et al., 2006; Du Vivier et al., 2014). As a result, it is possible to readily identify the CTB in the Portland Core and calculate its age by assigning dates to bentonite horizons in the Portland Core from recent radioisotopic measurements and then calculating durations to the CTB from the ATS.

For each estimate of the CTB age from individual bentonite dates, we combine all sources of uncertainty in quadrature, including full radioisotopic uncertainty, stratigraphic uncertainty from stage boundary placement and/or core sampling (<25 k.y.), and ATS uncertainty, which is approximated as  $\pm 1/4$  the duration of the short eccentricity tuning cycle (Sageman et al., 2014). The aggregate age of the CTB is calculated from the weighted mean age of all individual CTB age estimates (Eqn. 1).

$$\text{Eqn. 1: weighted mean age} = \frac{\sum_i^N \left( \frac{age_i}{\sigma_i^2} \right)}{\sum_i^N \left( \frac{1}{\sigma_i^2} \right)}$$

$$\text{Eqn. 2: two-sigma standard deviation of weighted mean age} = 2 \times \sqrt{\frac{1}{\sum_{i=1}^N \left( \frac{1}{\sigma_i^2} \right)}}$$

where:  $\sigma$  = one-sigma full age uncertainty for a calculation of the CTB age from a given bentonite sample measurement (i)

The weighted mean age for the CTB was calculated in two different scenarios in this study. For the first scenario, only the four new bentonite  $^{40}\text{Ar}/^{39}\text{Ar}$  ages from this study (NC-B, NC-C, K-07-01-C, 90-O-34), excluding outlier sample NC-D, were used to calculate the age of the CTB. For the second scenario, all recently measured  $^{40}\text{Ar}/^{39}\text{Ar}$  and U/Pb dates of the A-D bentonites, which did not show evidence for inheritance or being an outlier, were included in a calculation of the CTB age (Table S1).

TABLE S1. CENOMANIAN-TURONIAN BOUNDARY GEOCHRONOLOGY SUMMARY

Jones et al. (2020)

all Ar/Ar ages calculated relative to FCs of 28.201 Ma

Bentonite dates used to calculate the Cenomanian-Turonian Boundary age in the Portland Core.

| Bentonite (A-D) | Sample name   | Study                 | Technique | Age (Ma) | Uncertainty Myr (2sigma) | Total uncertainty Myr (2sigma) | Astronomical duration (Myr) to CTB in Portland Core | CTB age estimate | 2 sigma CTB age uncertainty (quadrature) | comments                                                                                                                                          |
|-----------------|---------------|-----------------------|-----------|----------|--------------------------|--------------------------------|-----------------------------------------------------|------------------|------------------------------------------|---------------------------------------------------------------------------------------------------------------------------------------------------|
| B               | average       | Meyers et al. (2012)  | Ar/Ar     | 94.100   | 0.140                    | 0.270                          | -0.168                                              | 93.932           | 0.272                                    | Meyers et al. (2012) mean argon-argon age for Bentonite B                                                                                         |
| B               | NE-08-01      | Meyers et al. (2012)  | U/Pb      | 94.010   | 0.040                    | 0.140                          | -0.168                                              | 93.842           | 0.144                                    | weighted mean of youngest 3 (might not include decay constant uncertainties)                                                                      |
| B               | Bighorn River | Barker et al. (2011)  | U/Pb      | 94.140   | 0.120                    | 0.190                          | -0.168                                              | 93.972           | 0.193                                    |                                                                                                                                                   |
| B               | K-07–01B      | Jicha et al. (2016)   | Ar/Ar     | 93.990   | 0.070                    | 0.160                          | -0.168                                              | 93.822           | 0.223                                    |                                                                                                                                                   |
| B               | 90-O-19       | Jicha et al. (2016)   | Ar/Ar     | 93.980   | 0.070                    | 0.160                          | -0.168                                              | 93.812           | 0.223                                    |                                                                                                                                                   |
| B               | NC-B          | this study            | Ar/Ar     | 94.082   | 0.057                    | 0.150                          | -0.168                                              | 93.914           | 0.154                                    |                                                                                                                                                   |
| C               | average       | Meyers et al. (2012)  | Ar/Ar     | 93.790   | 0.120                    | 0.260                          | 0.118                                               | 93.908           | 0.262                                    | Meyers et al. (2012) mean argon-argon age for Bentonite C                                                                                         |
| C               | NC-C          | this study            | Ar/Ar     | 94.011   | 0.060                    | 0.150                          | 0.118                                               | 94.129           | 0.154                                    | Youngest 4 of 6 zircons measured. Unclear if Bentonite D from central WIB is preserved in Maverick Basin based on mapping of bed by Elder (1988). |
| C               | K-07-01C      | this study            | Ar/Ar     | 94.022   | 0.147                    | 0.204                          | 0.118                                               | 94.140           | 0.223                                    |                                                                                                                                                   |
| D               | 90-O-34       | Meyers et al. (2012)  | Ar/Ar     | 93.670   | 0.210                    | 0.310                          | 0.266                                               | 93.936           | 0.312                                    |                                                                                                                                                   |
| D               | B3            | Eldrett et al. (2015) | U/Pb      | 93.670   | 0.037                    | 0.120                          | 0.266                                               | 93.936           | 0.125                                    |                                                                                                                                                   |
| D               | 90-O-34       | this study            | Ar/Ar     | 93.799   | 0.070                    | 0.160                          | 0.266                                               | 94.065           | 0.164                                    |                                                                                                                                                   |

| Cenomanian-Turonian Boundary Age   |       |
|------------------------------------|-------|
| weighted mean age (Ma):            | 93.95 |
| 2 sigma weighted uncertainty (Ma): | 0.05  |

| Bentonite D                        |       |
|------------------------------------|-------|
| weighted mean age (Ma):            | 93.72 |
| 2 sigma weighted uncertainty (Ma): | 0.09  |

| Bentonite B                        |       |
|------------------------------------|-------|
| weighted mean age (Ma):            | 94.04 |
| 2 sigma weighted uncertainty (Ma): | 0.07  |

| Bentonite C                        |       |
|------------------------------------|-------|
| weighted mean age (Ma):            | 93.97 |
| 2 sigma weighted uncertainty (Ma): | 0.11  |

Additional bentonite dates \*not\* used to calculate the Cenomanian-Turonian Boundary age due to concerns about zircon inheritance or outliers.

| Bentonite (A-D) | Sample name   | Study                | Technique | Age (Ma) | Uncertainty Myr (2sigma) | Total uncertainty Myr (2sigma) | Astronomical duration (Myr) to CTB in Portland Core | CTB age estimate | 2 sigma CTB age uncertainty (quadrature) | comments                                                                           |
|-----------------|---------------|----------------------|-----------|----------|--------------------------|--------------------------------|-----------------------------------------------------|------------------|------------------------------------------|------------------------------------------------------------------------------------|
| B               | K-07–01B      | Meyers et al. (2012) | U/Pb      | 94.44    | 0.07                     | 0.15                           | -0.168                                              | 94.272           | 0.15                                     | inherited zircons? Does not obey stratigraphic superposition, ~400 k.y. older than |
| B               | Bighorn River | Barker et al. (2011) | U/Pb      | 94.29    | 0.13                     | 0.2                            | -0.168                                              | 94.122           | 0.20                                     | NE-08-01. weighted mean of all 6 zircon analyses                                   |
| C               | AZLP-08-04    | Meyers et al. (2012) | U/Pb      | 94.37    | 0.04                     | 0.14                           | 0.118                                               | 94.488           | 0.14                                     | inherited zircons? Does not obey stratigraphic superposition                       |
| D               | AZLP-08-05    | Meyers et al. (2012) | U/Pb      | 94.09    | 0.13                     | 0.19                           | 0.266                                               | 94.356           | 0.19                                     | inherited zircons? Does not obey stratigraphic superposition                       |
| D               | NC-D          | this study           | Ar/Ar     | 93.443   | 0.09                     | 0.16                           | 0.266                                               | 93.709           | 0.16                                     | apparent outlier                                                                   |



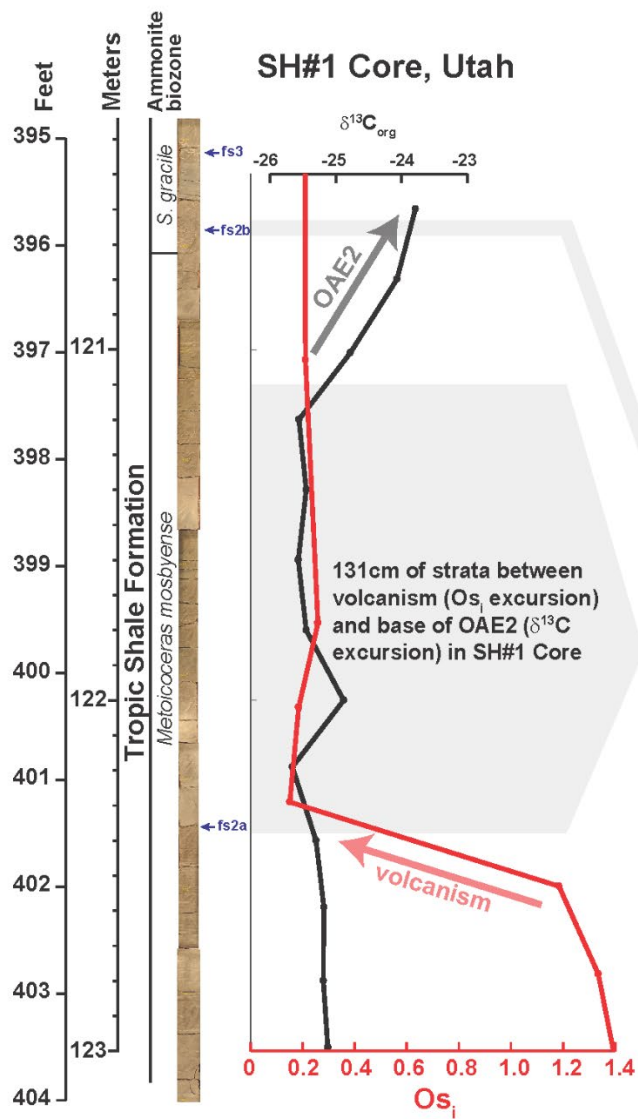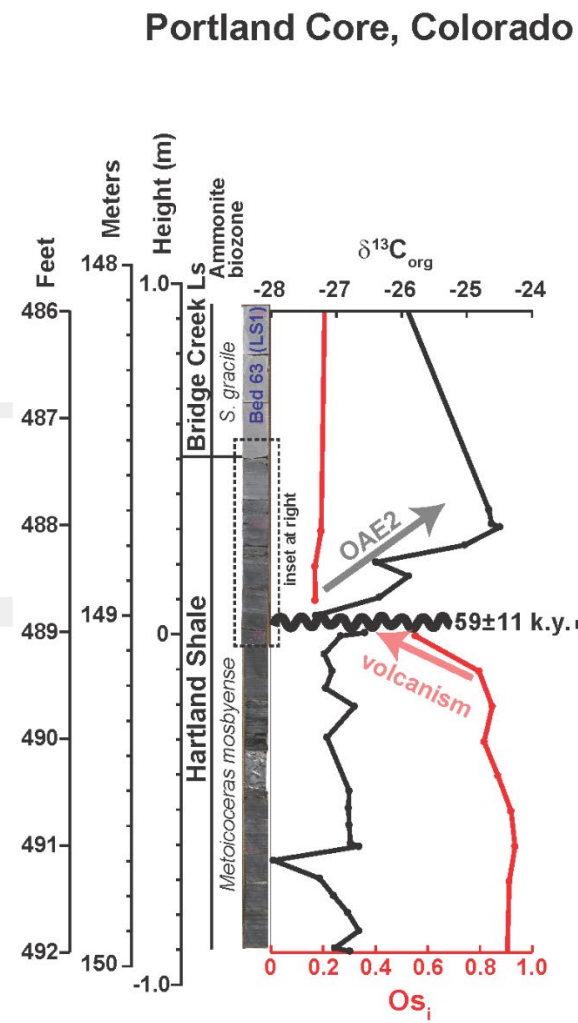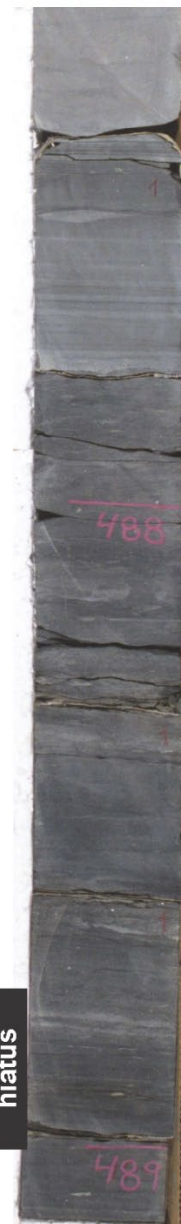



**Figure S4.** Core photos and chemostratigraphy of the OAE2 onset interval in the SH#1 (left) and Portland (right) cores. Note the expanded 131cm stratigraphic interval (grey shading) in SH#1 preserved between the initial osmium isotope ( $\text{Os}_i$ ) excursion (this study - red) and the base of OAE2, which is defined by the characteristic positive  $\delta^{13}\text{C}_{\text{org}}$  excursion (Jones et al., 2019). This interval is not preserved in the Portland Core of Colorado based on chemostratigraphic profiles ( $\text{Os}_i$  - Du Vivier et al., 2014;  $\delta^{13}\text{C}_{\text{org}}$  - Sageman et al., 2006), a feature which is attributed to a hiatus. There is no readily visible lithological evidence for this hiatus in the uppermost Hartland Shale in the Portland Core to accompany the geochemical data (see inset at right). However, Pratt (1984) and Eicher and Diner (1989), quoted below, identified erosive and disconformable sedimentological features at a correlative stratigraphic horizon in the base Turonian GSSP section at Rock Canyon Anticline in Pueblo, Colorado (30 km SE of the Portland Core). It is unclear if this hiatus was generated directly by erosion from the relative sea level lowstand in the upper *Metoicoceras mosbyense* Ammonite Biozone or by the subsequent transgression. Strata in southern Utah preserve a >100km shoreline progradation in the upper *M. mosbyense* zone (Fig. 2) in the S1 genetic sequence of Laurin et al. (2019), consistent with a lowstand interpretation for the hiatus. However, the hiatus was initially identified as a bone bed at Pueblo (Eicher and Diner, 1989), a type of lithofacies that is commonly deposited from sediment starvation during transgression in epeiric seaways (Brett, 1995). Therefore, the 0.5cm bone bed at Pueblo could alternatively represent a condensed bed of ~60 k.y. duration that correlates to transgression at flooding surface 2a (fs2a) in the SH#1 Core and overlying strata of the Unit 6B interval of Uličný (1999). The base of the unradiogenic  $\text{Os}_i$  excursion in the SH#1 Core occurs in sandy mudstones overlying a flooding surface “fs2a” (Fig. 4), consistent with a pre-OAE2 amalgamated lowstand and transgression, and potentially a brief hiatus at this site, too. However, any putative hiatus at SH#1 would need to be geologically brief ( $<59 \pm 10$  k.y.) given the preservation of 1.3 meters of strata between the  $\text{Os}_i$  and  $\delta^{13}\text{C}$  excursions (Fig. 4), and given recent correlations to nearby paralic sections (Laurin et al., 2019). More generally and regardless of the precise depositional mechanism, we consider the hiatus to be associated with the pre-OAE2 shoreline progradation and retrogradation pattern documented in the WIB (genetic sequence “S1” of Laurin et al., 2019) and lowstands in other basins globally (see discussion). More photos of the Portland Core are available at: <https://my.usgs.gov/crcwc/core/report/11834>. *S. gracile* – *Sciponoceras gracile*.

Observations consistent with a hiatus in the highest marly shale bed of the Hartland Shale from Rock Canyon Anticline in Pueblo, Colorado include:

“A thin wavy-bedded layer (0.5cm thick) composed of bone fragments, phosphatic pebbles, and quartz sand is scoured into the uppermost marly shale.” -Pratt (1984, p. 1150)

“A lamina of phosphatic bone and tooth fragments at the base of the 55-cm marlstone bed is inferred to be a lag deposit that marks a significant break in deposition.” -Eicher and Diner (1989, p. 136)

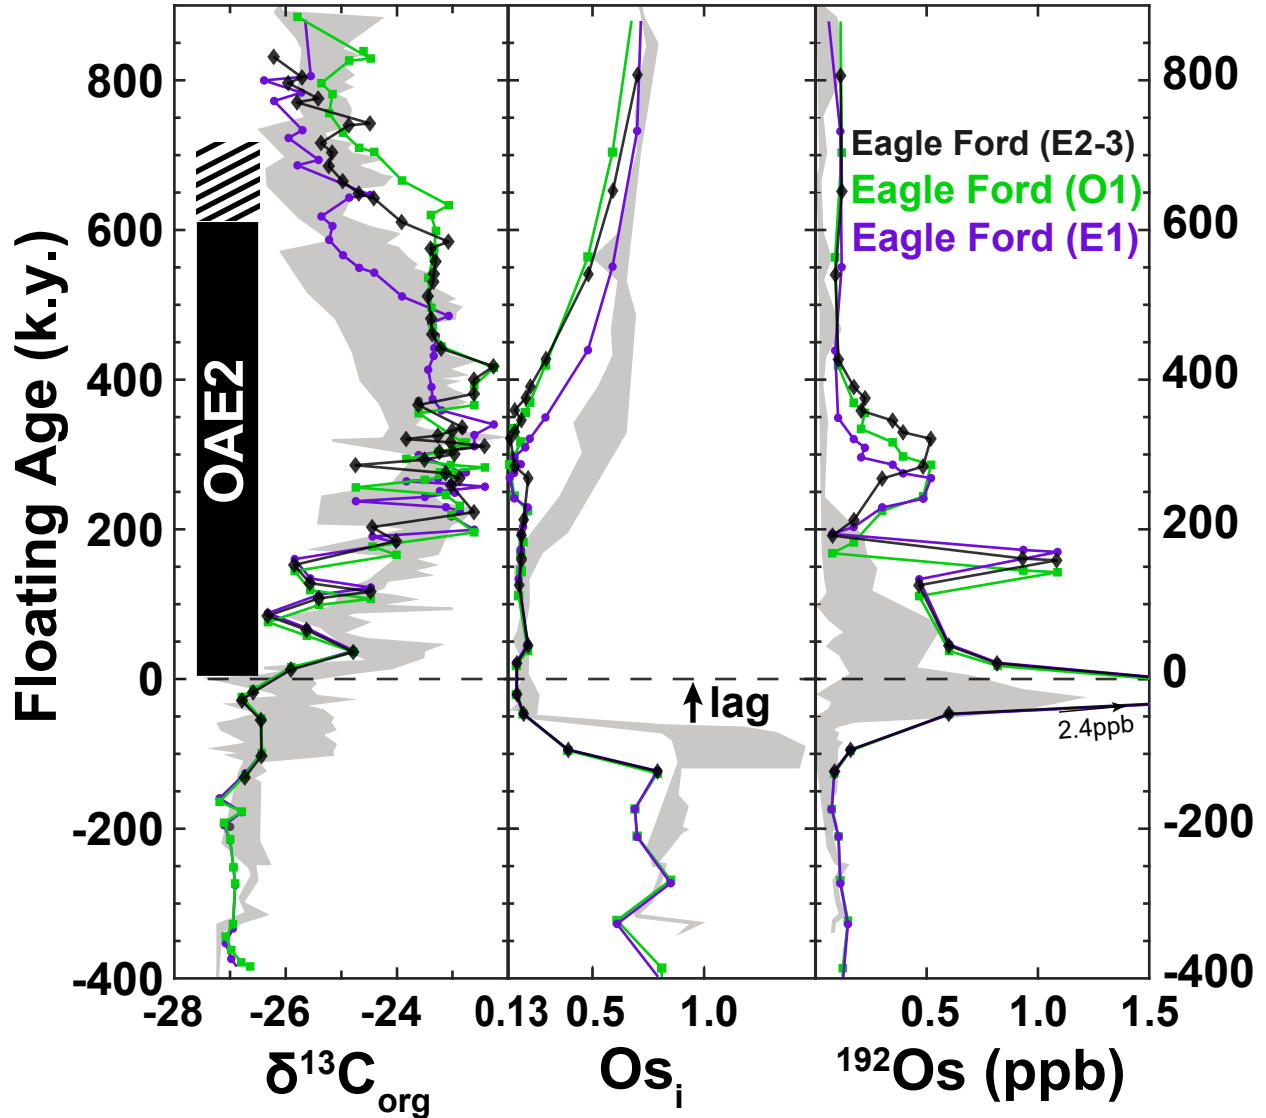

**Figure S5.** A comparison of floating astronomically-tuned geochemical timeseries spanning OAE2 from the mid-latitude sites of the Western Interior Basin (WIB, shaded records) with the Iona-1 Core of the Eagle Ford in Texas in the southernmost WIB (Meyers et al., 2001; Ma et al., 2014; Eldrett et al., 2015; Jones et al., 2019). From left to right - carbon isotopic ratios ( $\delta^{13}\text{C}_{\text{org}}$ ) (Sageman et al., 2006; Joo and Sageman, 2014; Eldrett et al., 2015; Jones et al., 2019), initial osmium isotope ratios ( $\text{Os}_i$ ) and  $^{192}\text{Os}$  concentrations (Du Vivier et al., 2014; Sullivan et al., 2020; this study). Different floating astronomical age models for the Eagle Ford data from long eccentricity bandpass (E1, purple circles) and obliquity tuning (O1, green square) scenarios (supplemental material of Eldrett et al., 2015) are plotted. A short eccentricity bandpass age model is also estimated (E2-3, black diamonds) from figure 9 of Eldrett et al. (2015). All records exhibit temporal lag between  $\text{Os}_i$  excursions and significant ( $>+1\%$ )  $\delta^{13}\text{C}$  excursions defining the base of OAE2. Based on the  $\delta^{13}\text{C}$  time series, the floating E1 age model of the Eagle Ford overlaps well with the age models from mid-latitude WIB sites, whereas the O1 age model indicates a longer duration of OAE2. Elevated  $^{192}\text{Os}$  and unradiogenic  $\text{Os}_i$  values persist for 150-250 k.y. longer in the Eagle Ford than the WIB in each age model scenario during OAE2, potentially representing differences in circulation between regions or residual discrepancies in astronomical tuning among sites within the carbon isotope excursion interval.

### Angus Core depth scale correction

Depths of samples horizons in the Angus Core were measured as centimeters offset from footage markers on slabbed core, for example 7474'-10cm (+cm = horizon deeper than foot marker, -cm = horizon shallower than foot marker). However, one of the footage markers (7475') in the Bridge Creek Limestone interval of the Angus Core was mismarked during original splitting of the core prior to donation to Northwestern University. Thus, samples with measured depths that reference this footage marker are offset from true depth. The corrections are as follows:

- <7475 feet - no corrections needed
- ≥7475 feet - add 19.92 cm to marked depth

Table S3 also corrected for core labeling and unit conversion. Although these depth offsets are relatively minor, it is necessary to correct for high-resolution evaluations of timing of the OAE2 chemostratigraphic record (one precession cycle  $\approx$  30-40 cm). It is also needed to ensure proper alignment of previous continuous XRF core scanning data, the foundation of the Angus core astronomical time scale (Ma et al., 2014), with discrete geochemical samples analyzed for  $\delta^{13}\text{C}$  and Re-Os geochemical data (this study). Thus, depths of all legacy  $\delta^{13}\text{C}_{\text{org}}$  data (Joo and Sageman, 2014) and new Re-Os data (this study) from the Angus Core are corrected prior to conversion to metric depths and plotting (Fig. 3; Tables 1, S2, S3).

**TABLE S2.** NEW WEIGHT PERCENT TOTAL ORGANIC CARBON (%TOC) AND CARBONATE CONTENT (%CaCO<sub>3</sub>) FROM THE ANGUS CORE SPANNING THE ONSET OF OCEANIC ANOXIC EVENT 2.

| ID    | Updated Depth (m) | %CaCO <sub>3</sub> | %TOC |
|-------|-------------------|--------------------|------|
| AA-18 | 2277.70           | 81.19              | 0.41 |
| AA-18 | 2278.10           | 71.23              | 0.50 |
| AA-18 | 2278.20           | 25.88              | 1.12 |
| AA-18 | 2278.30           | 36.50              | 2.35 |
| AA-18 | 2278.52           | 70.49              | 0.50 |
| AA-18 | 2278.60           | 54.03              | 1.22 |
| AA-18 | 2278.70           | 64.93              | 0.65 |
| AA-18 | 2278.80           | 62.71              | 0.57 |
| AA-18 | 2279.00           | 51.65              | 3.26 |
| AA-18 | 2279.10           | 64.81              | 1.69 |
| AA-18 | 2279.20           | 60.10              | 0.90 |
| AA-18 | 2279.30           | 37.30              | 2.67 |
| AA-18 | 2280.50           | 40.01              | 2.70 |
| AA-18 | 2280.80           | 45.48              | 2.28 |
| AA-18 | 2281.00           | 34.83              | 2.49 |
| AA-18 | 2281.80           | 32.65              | 2.44 |
| AA-18 | 2282.20           | 42.95              | 2.43 |
| AA-18 | 2282.60           | 26.99              | 2.57 |

**TABLE S3.** CORRECTED ANGUS CORE DEPTHS OAE2 INTERVAL. GEOCHEMICAL DATA AND ORIGINAL DEPTHS FROM JOO & SAGEMAN (2014). IC%=INORGANIC CARBON (WT.%), OC% = ORGANIC CARBON (WT.%).

| Originally published depth (m) | Depth(m) adjusted for core marking discrepancies | $\delta^{13}\text{C}_{\text{org}}$ (‰) | IC%  | OC% (CaCO <sub>3</sub> free) |
|--------------------------------|--------------------------------------------------|----------------------------------------|------|------------------------------|
| 2267.01                        | 2268.03                                          | -26.43                                 | 7.34 | 4.87                         |
| 2267.51                        | 2268.53                                          | -26.01                                 | 8.73 | 2.21                         |
| 2268.01                        | 2269.02                                          | -25.96                                 | 9.15 | 2.69                         |
| 2269.05                        | 2269.98                                          | -25.75                                 | 4.32 | 2.08                         |
| 2269.55                        | 2270.52                                          | -25.16                                 | 8.69 | 2.68                         |
| 2270.05                        | 2271.02                                          | -24.88                                 | 7.52 | 3.65                         |
| 2270.51                        | 2271.48                                          | -25.62                                 | 8.35 | 1.08                         |
| 2271.01                        | 2271.98                                          | -25.10                                 | 7.24 | 1.96                         |
| 2271.51                        | 2272.48                                          | -24.80                                 | 6.73 | 1.5                          |
| 2272.01                        | 2272.98                                          | -24.25                                 | 7.8  | 3.65                         |
| 2272.51                        | 2273.48                                          | -24.01                                 | 7.89 | 1.79                         |
| 2273.01                        | 2273.97                                          | -23.80                                 | 6.51 | 4.23                         |
| 2273.51                        | 2274.48                                          | -23.37                                 | 7.1  | 2.94                         |
| 2273.97                        | 2274.95                                          | -24.06                                 | 7.11 | 1.4                          |
| 2274.47                        | 2275.45                                          | -24.13                                 | 7.19 | 1.79                         |
| 2274.97                        | 2275.95                                          | -23.71                                 | 6.84 | 3.87                         |
| 2275.47                        | 2276.45                                          | -23.96                                 | 4.86 | 1.45                         |
| 2275.94                        | 2276.92                                          | -24.48                                 | 3.00 | 0.98                         |
| 2276.47                        | 2277.45                                          | -24.54                                 | 6.12 | 1.41                         |
| 2277.00                        | 2277.98                                          | -25.38                                 | 4.55 | 7.56                         |
| 2277.50                        | 2278.48                                          | -24.84                                 | 8.2  | 1.12                         |
| 2278.00                        | 2278.93                                          | -25.48                                 | 6.7  | 2.61                         |
| 2278.49                        | 2279.42                                          | -26.50                                 | 5.28 | 4.11                         |
| 2278.54                        | 2279.47                                          | -26.23                                 | 5.23 | 3.61                         |
| 2278.64                        | 2279.57                                          | -26.07                                 | 5.17 | 3.01                         |
| 2278.69                        | 2279.62                                          | -26.73                                 | 4.27 | 4.69                         |
| 2278.74                        | 2279.67                                          | -26.80                                 | 3.98 | 4.78                         |
| 2278.79                        | 2279.72                                          | -26.39                                 | 4.5  | 4.45                         |
| 2278.84                        | 2279.77                                          | -26.98                                 | 5.63 | 3.09                         |
| 2278.94                        | 2279.87                                          | -26.56                                 | 6.78 | 1.87                         |
| 2278.99                        | 2279.92                                          | -26.36                                 | 4.73 | 2.42                         |
| 2279.04                        | 2279.97                                          | -26.66                                 | 3.93 | 4.08                         |
| 2279.09                        | 2280.02                                          | -26.41                                 | 2.76 | 2.7                          |
| 2279.14                        | 2280.07                                          | -26.14                                 | 3.16 | 3.4                          |
| 2279.24                        | 2280.17                                          | -26.46                                 | 4.26 | 3.67                         |
| 2279.29                        | 2280.22                                          | -26.45                                 | 4.53 | 3.77                         |
| 2279.34                        | 2280.27                                          | -26.78                                 | 4.39 | 3.75                         |
| 2279.39                        | 2280.32                                          | -26.31                                 | 4.84 | 4.09                         |
| 2280.49                        | 2281.40                                          | -26.82                                 | 4.76 | 4.67                         |
| 2281.99                        | 2282.89                                          | -27.11                                 | 6.92 | 5.97                         |
| 2282.49                        | 2283.38                                          | -26.67                                 | 5.08 | 4.64                         |
| 2282.99                        | 2283.89                                          | -26.65                                 | 6.05 | 4.52                         |

Table S4. Complete <sup>40</sup>Ar/<sup>39</sup>Ar results

| Single crystal incremental heating                                 |           |                                     |                                     |                                     |                                     |                                     |                                                  |            |                     |                |            |        |             |
|--------------------------------------------------------------------|-----------|-------------------------------------|-------------------------------------|-------------------------------------|-------------------------------------|-------------------------------------|--------------------------------------------------|------------|---------------------|----------------|------------|--------|-------------|
| Sample:                                                            | NC-B      |                                     |                                     |                                     |                                     |                                     |                                                  |            |                     |                |            |        |             |
| Material:                                                          | sanidine  |                                     |                                     |                                     |                                     |                                     |                                                  |            |                     |                |            |        |             |
|                                                                    | Laser     | <sup>40</sup> Ar ± 2σ <sub>40</sub> | <sup>39</sup> Ar ± 2σ <sub>39</sub> | <sup>38</sup> Ar ± 2σ <sub>38</sub> | <sup>37</sup> Ar ± 2σ <sub>37</sub> | <sup>36</sup> Ar ± 2σ <sub>36</sub> |                                                  |            |                     |                |            |        | Included in |
| File                                                               | Power (%) | (cps) (cps)                         | <sup>40</sup> Ar*/ <sup>39</sup> Ar <sub>K</sub> | ± 2σ       | % <sup>40</sup> Ar* | Age (Ma)       | ± 2σ (Ma)  | K/Ca   | plateau     |
| NAH8018                                                            | 0.35      | 129947 ± 291                        | 34079 ± 65                          | 414 ± 7                             | 150 ± 41                            | 74.318 ± 5.026                      | 3.149130                                         | ± 0.033260 | 97.97               | 94.06 ± 0.97   |            | 92.22  | YES         |
| NAH8021                                                            | 0.5       | 278108 ± 584                        | 87675 ± 78                          | 1050 ± 8                            | 334 ± 40                            | 6.420 ± 2.341                       | 3.149921                                         | ± 0.008003 | 99.30               | 94.09 ± 0.23   |            | 113.02 | YES         |
| NAH8023                                                            | 0.65      | 263702 ± 551                        | 83567 ± 111                         | 1008 ± 11                           | 328 ± 51                            | 1.448 ± 2.544                       | 3.150180                                         | ± 0.009124 | 99.83               | 94.09 ± 0.27   |            | 109.55 | YES         |
| NAH8026                                                            | 0.8       | 207515 ± 432                        | 65299 ± 119                         | 777 ± 13                            | 310 ± 52                            | 3.738 ± 3.756                       | 3.152680                                         | ± 0.016485 | 99.89               | 94.17 ± 0.48   |            | 108.74 | YES         |
| NAH8028                                                            | 0.95      | 169458 ± 364                        | 53692 ± 84                          | 649 ± 9                             | 212 ± 49                            | 0.581 ± 2.961                       | 3.152782                                         | ± 0.036995 | 97.97               | 94.17 ± 1.08   |            | 112.13 | YES         |
| NAH8031                                                            | 1.15      | 139088 ± 317                        | 43617 ± 84                          | 524 ± 9                             | 188 ± 60                            | 4.081 ± 3.173                       | 3.153140                                         | ± 0.021278 | 99.37               | 94.18 ± 0.62   |            | 106.51 | YES         |
| NAH8036                                                            | 1.8       | 77512 ± 189                         | 24085 ± 58                          | 287 ± 7                             | 92 ± 38                             | 5.263 ± 2.983                       | 3.160655                                         | ± 0.017196 | 99.46               | 94.40 ± 0.50   |            | 90.72  | YES         |
| NAH8038                                                            | 2.5       | 137316 ± 313                        | 43275 ± 70                          | 522 ± 9                             | 175 ± 59                            | 2.858 ± 3.081                       | 3.160727                                         | ± 0.021742 | 99.12               | 94.40 ± 0.63   |            | 99.63  | YES         |
| NAH8041                                                            | 10        | 89292 ± 229                         | 27778 ± 55                          | 334 ± 7                             | 130 ± 61                            | 6.062 ± 3.093                       | 3.161803                                         | ± 0.044060 | 82.92               | 94.43 ± 1.28   |            | 97.94  | YES         |
| Plateau age (9 of 9):                                              |           |                                     |                                     |                                     |                                     |                                     |                                                  |            |                     | 94.15 ± 0.15   | MSWD: 0.29 |        |             |
| Inverse isochron age (9 of 9):                                     |           |                                     |                                     |                                     |                                     |                                     |                                                  |            |                     | 94.16 ± 0.28   |            |        |             |
| <sup>(40</sup> Ar/ <sup>36</sup> Ar) <sub>trapped</sub> intercept: |           |                                     |                                     |                                     |                                     |                                     |                                                  |            |                     | 303 ± 32       |            |        |             |
| Integrated age (9 of 9):                                           |           |                                     |                                     |                                     |                                     |                                     |                                                  |            |                     | 94.21 ± 0.18   |            |        |             |
| Sample:                                                            | NC-B      |                                     |                                     |                                     |                                     |                                     |                                                  |            |                     |                |            |        |             |
| Material:                                                          | sanidine  |                                     |                                     |                                     |                                     |                                     |                                                  |            |                     |                |            |        |             |
|                                                                    | Laser     | <sup>40</sup> Ar ± 2σ <sub>40</sub> | <sup>39</sup> Ar ± 2σ <sub>39</sub> | <sup>38</sup> Ar ± 2σ <sub>38</sub> | <sup>37</sup> Ar ± 2σ <sub>37</sub> | <sup>36</sup> Ar ± 2σ <sub>36</sub> |                                                  |            |                     |                |            |        | Included in |
| File                                                               | Power (%) | (cps) (cps)                         | <sup>40</sup> Ar*/ <sup>39</sup> Ar <sub>K</sub> | ± 2σ       | % <sup>40</sup> Ar* | Age (Ma)       | ± 2σ (Ma)  | K/Ca   | plateau     |
| NAH8046                                                            | 0.35      | 246109 ± 528                        | 77026 ± 114                         | 934 ± 11                            | 308 ± 51                            | 13.656 ± 2.764                      | 3.142006                                         | ± 0.010746 | 98.34               | 93.86 ± 0.31   |            | 107.51 | YES         |
| NAH8048                                                            | 0.45      | 311111 ± 703                        | 98999 ± 134                         | 1205 ± 18                           | 465 ± 51                            | 0.372 ± 3.353                       | 3.141295                                         | ± 0.010148 | 99.96               | 93.83 ± 0.30   |            | 91.47  | YES         |
| NAH8051                                                            | 0.55      | 335101 ± 695                        | 106031 ± 116                        | 1276 ± 13                           | 462 ± 58                            | 2.704 ± 3.058                       | 3.152599                                         | ± 0.008644 | 99.75               | 94.16 ± 0.25   |            | 98.70  | YES         |
| NAH8053                                                            | 0.7       | 185224 ± 413                        | 58822 ± 86                          | 710 ± 10                            | 265 ± 62                            | 0.618 ± 3.248                       | 3.145576                                         | ± 0.016507 | 99.89               | 93.96 ± 0.48   |            | 95.49  | YES         |
| NAH8056                                                            | 0.85      | 556325 ± 1153                       | 175649 ± 142                        | 2112 ± 16                           | 752 ± 60                            | 9.355 ± 3.175                       | 3.151165                                         | ± 0.005442 | 99.49               | 94.12 ± 0.16   |            | 100.40 | YES         |
| NAH8058                                                            | 1.05      | 418808 ± 956                        | 132287 ± 143                        | 1602 ± 14                           | 574 ± 58                            | 6.184 ± 3.032                       | 3.151766                                         | ± 0.006889 | 99.55               | 94.14 ± 0.20   |            | 99.09  | YES         |
| NAH8061                                                            | 1.3       | 102326 ± 251                        | 31862 ± 64                          | 380 ± 9                             | 126 ± 57                            | 6.984 ± 3.590                       | 3.145902                                         | ± 0.033657 | 97.95               | 93.97 ± 0.98   |            | 108.93 | YES         |
| NAH8063                                                            | 1.8       | 2302 ± 51                           | 454 ± 10                            | 6 ± 3                               | 3 ± 64                              | 1.018 ± 3.259                       | 4.399114                                         | ± 2.142432 | 86.79               | 130.10 ± 61.16 |            | 65.62  | YES         |
| Plateau age (8 of 8):                                              |           |                                     |                                     |                                     |                                     |                                     |                                                  |            |                     | 94.07 ± 0.10   | MSWD: 1.08 |        |             |
| Inverse isochron age (8 of 8):                                     |           |                                     |                                     |                                     |                                     |                                     |                                                  |            |                     | 94.09 ± 0.45   |            |        |             |
| <sup>(40</sup> Ar/ <sup>36</sup> Ar) <sub>trapped</sub> intercept: |           |                                     |                                     |                                     |                                     |                                     |                                                  |            |                     | 290 ± 130      |            |        |             |
| Integrated age (8 of 8):                                           |           |                                     |                                     |                                     |                                     |                                     |                                                  |            |                     | 94.43 ± 0.11   |            |        |             |
| Sample:                                                            | NC-B      |                                     |                                     |                                     |                                     |                                     |                                                  |            |                     |                |            |        |             |
| Material:                                                          | sanidine  |                                     |                                     |                                     |                                     |                                     |                                                  |            |                     |                |            |        |             |
|                                                                    | Laser     | <sup>40</sup> Ar ± 2σ <sub>40</sub> | <sup>39</sup> Ar ± 2σ <sub>39</sub> | <sup>38</sup> Ar ± 2σ <sub>38</sub> | <sup>37</sup> Ar ± 2σ <sub>37</sub> | <sup>36</sup> Ar ± 2σ <sub>36</sub> |                                                  |            |                     |                |            |        | Included in |
| File                                                               | Power (%) | (cps) (cps)                         | <sup>40</sup> Ar*/ <sup>39</sup> Ar <sub>K</sub> | ± 2σ       | % <sup>40</sup> Ar* | Age (Ma)       | ± 2σ (Ma)  | K/Ca   | plateau     |
| NAH8073                                                            | 0.35      | 270273 ± 645                        | 85161 ± 132                         | 1037 ± 14                           | 359 ± 53                            | 11.015 ± 3.507                      | 3.134853                                         | ± 0.012327 | 98.78               | 93.65 ± 0.36   |            | 102.02 |             |
| NAH8076                                                            | 0.45      | 344995 ± 810                        | 109248 ± 144                        | 1318 ± 14                           | 449 ± 49                            | 0.237 ± 2.633                       | 3.157048                                         | ± 0.007246 | 99.97               | 94.29 ± 0.21   |            | 104.70 | YES         |
| NAH8078                                                            | 0.55      | 268215 ± 591                        | 85087 ± 126                         | 1034 ± 12                           | 342 ± 67                            | 1.218 ± 2.785                       | 3.147773                                         | ± 0.009809 | 99.86               | 94.02 ± 0.29   |            | 107.11 | YES         |
| NAH8081                                                            | 0.7       | 294867 ± 636                        | 92895 ± 124                         | 1108 ± 13                           | 368 ± 58                            | 6.050 ± 3.175                       | 3.154524                                         | ± 0.010235 | 99.38               | 94.22 ± 0.30   |            | 108.51 | YES         |
| NAH8083                                                            | 0.85      | 195258 ± 451                        | 61255 ± 96                          | 734 ± 11                            | 277 ± 57                            | 7.904 ± 3.695                       | 3.148933                                         | ± 0.018034 | 98.79               | 94.06 ± 0.53   |            | 94.92  | YES         |
| NAH8086                                                            | 1.05      | 97172 ± 235                         | 29966 ± 68                          | 359 ± 6                             | 129 ± 50                            | 8.976 ± 3.006                       | 3.153148                                         | ± 0.029966 | 97.24               | 94.18 ± 0.87   |            | 100.14 | YES         |
| NAH8088                                                            | 1.4       | 29232 ± 103                         | 8771 ± 36                           | 106 ± 5                             | 26 ± 52                             | 4.556 ± 3.328                       | 3.177513                                         | ± 0.113297 | 95.34               | 94.89 ± 3.30   |            | 146.14 | YES         |
| NAH8091                                                            | 2.5       | 5230 ± 54                           | 1214 ± 15                           | 13 ± 3                              | 1 ± 42                              | 2.878 ± 3.185                       | 3.598720                                         | ± 0.783085 | 83.56               | 107.11 ± 22.64 |            | 435.19 | YES         |
| Plateau age (7 of 8):                                              |           |                                     |                                     |                                     |                                     |                                     |                                                  |            |                     | 94.19 ± 0.14   | MSWD: 0.68 |        |             |
| Inverse isochron age (7 of 8):                                     |           |                                     |                                     |                                     |                                     |                                     |                                                  |            |                     | 94.18 ± 0.50   |            |        |             |
| <sup>(40</sup> Ar/ <sup>36</sup> Ar) <sub>trapped</sub> intercept: |           |                                     |                                     |                                     |                                     |                                     |                                                  |            |                     | 317 ± 140      |            |        |             |
| Integrated age (8 of 8):                                           |           |                                     |                                     |                                     |                                     |                                     |                                                  |            |                     | 94.12 ± 0.16   |            |        |             |

| Sample:<br>Material: | NC-B<br>sanidine |                                   |                                   |                                   |                                   |                                   |                                                 |                      |                  |                    |        |         |             |
|----------------------|------------------|-----------------------------------|-----------------------------------|-----------------------------------|-----------------------------------|-----------------------------------|-------------------------------------------------|----------------------|------------------|--------------------|--------|---------|-------------|
|                      | Laser            | $^{40}\text{Ar} \pm 2\sigma_{40}$ | $^{39}\text{Ar} \pm 2\sigma_{39}$ | $^{38}\text{Ar} \pm 2\sigma_{38}$ | $^{37}\text{Ar} \pm 2\sigma_{37}$ | $^{36}\text{Ar} \pm 2\sigma_{36}$ |                                                 |                      |                  |                    |        |         | Included in |
| File                 | Power (%)        | (cps) (cps)                       | $^{40}\text{Ar}^*/^{39}\text{Ar}_K \pm 2\sigma$ | % $^{40}\text{Ar}^*$ | Age (Ma)         | $\pm 2\sigma$ (Ma) | K/Ca   | plateau |             |
| NAH8094              | 0.3              | 66043 $\pm$ 162                   | 18454 $\pm$ 44                    | 220 $\pm$ 6                       | 92 $\pm$ 52                       | 26.686 $\pm$ 3.349                | 3.146812 $\pm$ 0.054193                         | 87.93                | 94.00 $\pm$ 1.58 |                    | 86.04  | YES     |             |
| NAH8097              | 0.37             | 128485 $\pm$ 297                  | 40333 $\pm$ 73                    | 494 $\pm$ 7                       | 171 $\pm$ 63                      | 6.034 $\pm$ 3.055                 | 3.140720 $\pm$ 0.022632                         | 98.59                | 93.82 $\pm$ 0.66 |                    | 101.24 | YES     |             |
| NAH8099              | 0.44             | 337813 $\pm$ 742                  | 107153 $\pm$ 139                  | 1299 $\pm$ 14                     | 446 $\pm$ 41                      | 3.385 $\pm$ 3.872                 | 3.143009 $\pm$ 0.010820                         | 99.69                | 93.88 $\pm$ 0.32 |                    | 103.31 | YES     |             |
| NAH8101              | 0.51             | 484872 $\pm$ 1055                 | 153720 $\pm$ 163                  | 1849 $\pm$ 18                     | 647 $\pm$ 51                      | 0.235 $\pm$ 3.835                 | 3.153596 $\pm$ 0.007487                         | 99.98                | 94.19 $\pm$ 0.22 |                    | 102.23 | YES     |             |
| NAH8103              | 0.6              | 108546 $\pm$ 272                  | 34357 $\pm$ 70                    | 417 $\pm$ 8                       | 128 $\pm$ 38                      | 2.075 $\pm$ 3.177                 | 3.141057 $\pm$ 0.027624                         | 99.42                | 93.83 $\pm$ 0.80 |                    | 115.46 | YES     |             |
| NAH8105              | 0.75             | 103816 $\pm$ 260                  | 32785 $\pm$ 70                    | 391 $\pm$ 8                       | 101 $\pm$ 72                      | 3.247 $\pm$ 3.587                 | 3.136686 $\pm$ 0.032678                         | 99.06                | 93.70 $\pm$ 0.95 |                    | 139.83 | YES     |             |
| NAH8107              | 0.95             | 76020 $\pm$ 198                   | 24052 $\pm$ 61                    | 283 $\pm$ 9                       | 68 $\pm$ 53                       | 1.119 $\pm$ 5.580                 | 3.146430 $\pm$ 0.069271                         | 99.55                | 93.98 $\pm$ 2.02 |                    | 151.73 | YES     |             |
| NAH8109              | 1.35             | 70877 $\pm$ 196                   | 22313 $\pm$ 57                    | 268 $\pm$ 8                       | 70 $\pm$ 62                       | 3.864 $\pm$ 3.542                 | 3.124540 $\pm$ 0.047406                         | 98.36                | 93.35 $\pm$ 1.38 |                    | 136.63 | YES     |             |
| NAH8112              | 10               | 89556 $\pm$ 243                   | 27500 $\pm$ 67                    | 321 $\pm$ 10                      | 97 $\pm$ 53                       | 8.136 $\pm$ 4.255                 | 3.168029 $\pm$ 0.046208                         | 97.28                | 94.61 $\pm$ 1.34 |                    | 121.95 | YES     |             |

Plateau age (9 of 9): 94.05  $\pm$  0.17 MSWD: 0.74

Inverse isochron age (9 of 9): 94.06  $\pm$  0.37

( $^{40}\text{Ar}/^{36}\text{Ar}$ )<sub>trapped</sub> intercept: 295  $\pm$  58

Integrated age (9 of 9): 93.99  $\pm$  0.22

| Sample:<br>Material: | NC-B<br>sanidine |                                   |                                   |                                   |                                   |                                   |                                                 |                      |                  |                    |       |         |             |
|----------------------|------------------|-----------------------------------|-----------------------------------|-----------------------------------|-----------------------------------|-----------------------------------|-------------------------------------------------|----------------------|------------------|--------------------|-------|---------|-------------|
|                      | Laser            | $^{40}\text{Ar} \pm 2\sigma_{40}$ | $^{39}\text{Ar} \pm 2\sigma_{39}$ | $^{38}\text{Ar} \pm 2\sigma_{38}$ | $^{37}\text{Ar} \pm 2\sigma_{37}$ | $^{36}\text{Ar} \pm 2\sigma_{36}$ |                                                 |                      |                  |                    |       |         | Included in |
| File                 | Power (%)        | (cps) (cps)                       | $^{40}\text{Ar}^*/^{39}\text{Ar}_K \pm 2\sigma$ | % $^{40}\text{Ar}^*$ | Age (Ma)         | $\pm 2\sigma$ (Ma) | K/Ca  | plateau |             |
| NAH8115              | 0.3              | 46924 $\pm$ 136                   | 13453 $\pm$ 42                    | 156 $\pm$ 6                       | 63 $\pm$ 49                       | 8.505 $\pm$ 3.309                 | 3.299150 $\pm$ 0.073441                         | 94.58                | 98.43 $\pm$ 2.13 |                    | 91.11 |         |             |
| NAH8118              | 0.37             | 74339 $\pm$ 191                   | 23337 $\pm$ 54                    | 286 $\pm$ 7                       | 102 $\pm$ 61                      | 3.041 $\pm$ 3.207                 | 3.146306 $\pm$ 0.041039                         | 98.77                | 93.98 $\pm$ 1.19 |                    | 98.06 | YES     |             |
| NAH8120              | 0.44             | 244551 $\pm$ 560                  | 77543 $\pm$ 117                   | 949 $\pm$ 14                      | 377 $\pm$ 53                      | 2.100 $\pm$ 4.492                 | 3.145527 $\pm$ 0.017317                         | 99.74                | 93.96 $\pm$ 0.50 |                    | 88.49 | YES     |             |
| NAH8122              | 0.51             | 529123 $\pm$ 1157                 | 168140 $\pm$ 185                  | 2040 $\pm$ 19                     | 807 $\pm$ 69                      | 0.591 $\pm$ 4.469                 | 3.145722 $\pm$ 0.007974                         | 99.96                | 93.96 $\pm$ 0.23 |                    | 89.60 | YES     |             |
| NAH8124              | 0.6              | 471933 $\pm$ 1038                 | 149720 $\pm$ 185                  | 1814 $\pm$ 16                     | 699 $\pm$ 79                      | 2.514 $\pm$ 3.683                 | 3.146943 $\pm$ 0.007389                         | 99.84                | 94.00 $\pm$ 0.22 |                    | 92.07 | YES     |             |
| NAH8126              | 0.75             | 207119 $\pm$ 500                  | 65280 $\pm$ 131                   | 779 $\pm$ 14                      | 302 $\pm$ 58                      | 5.723 $\pm$ 4.189                 | 3.146445 $\pm$ 0.019185                         | 99.17                | 93.98 $\pm$ 0.56 |                    | 93.08 | YES     |             |
| NAH8128              | 1                | 101142 $\pm$ 253                  | 31697 $\pm$ 73                    | 375 $\pm$ 8                       | 141 $\pm$ 48                      | 2.179 $\pm$ 3.463                 | 3.170240 $\pm$ 0.032636                         | 99.35                | 94.68 $\pm$ 0.95 |                    | 96.74 | YES     |             |
| NAH8130              | 1.7              | 181851 $\pm$ 428                  | 57357 $\pm$ 118                   | 696 $\pm$ 13                      | 271 $\pm$ 52                      | 4.879 $\pm$ 4.425                 | 3.144981 $\pm$ 0.023055                         | 99.19                | 93.94 $\pm$ 0.67 |                    | 90.86 | YES     |             |
| NAH8133              | 10               | 110109 $\pm$ 251                  | 33263 $\pm$ 66                    | 405 $\pm$ 7                       | 147 $\pm$ 70                      | 9.965 $\pm$ 3.044                 | 3.220658 $\pm$ 0.027335                         | 97.29                | 96.14 $\pm$ 0.79 |                    | 97.19 |         |             |

Plateau age (7 of 9): 93.99  $\pm$  0.14 MSWD: 0.36

Inverse isochron age (7 of 9): 94.00  $\pm$  1.90

( $^{40}\text{Ar}/^{36}\text{Ar}$ )<sub>trapped</sub> intercept: 347  $\pm$  320

Integrated age (9 of 9): 94.22  $\pm$  0.16

| Sample:<br>Material: | NC-B<br>sanidine |                                   |                                   |                                   |                                   |                                   |                                                 |                      |                  |                    |        |         |             |
|----------------------|------------------|-----------------------------------|-----------------------------------|-----------------------------------|-----------------------------------|-----------------------------------|-------------------------------------------------|----------------------|------------------|--------------------|--------|---------|-------------|
|                      | Laser            | $^{40}\text{Ar} \pm 2\sigma_{40}$ | $^{39}\text{Ar} \pm 2\sigma_{39}$ | $^{38}\text{Ar} \pm 2\sigma_{38}$ | $^{37}\text{Ar} \pm 2\sigma_{37}$ | $^{36}\text{Ar} \pm 2\sigma_{36}$ |                                                 |                      |                  |                    |        |         | Included in |
| File                 | Power (%)        | (cps) (cps)                       | $^{40}\text{Ar}^*/^{39}\text{Ar}_K \pm 2\sigma$ | % $^{40}\text{Ar}^*$ | Age (Ma)         | $\pm 2\sigma$ (Ma) | K/Ca   | plateau |             |
| NAH8136              | 0.3              | 60606 $\pm$ 159                   | 16910 $\pm$ 52                    | 199 $\pm$ 6                       | 59 $\pm$ 49                       | 16.613 $\pm$ 3.590                | 3.290522 $\pm$ 0.063402                         | 91.81                | 98.17 $\pm$ 1.84 |                    | 122.35 |         |             |
| NAH8139              | 0.38             | 302932 $\pm$ 624                  | 93643 $\pm$ 121                   | 1137 $\pm$ 12                     | 342 $\pm$ 57                      | 26.097 $\pm$ 3.499                | 3.151528 $\pm$ 0.011181                         | 97.42                | 94.13 $\pm$ 0.33 |                    | 117.91 | YES     |             |
| NAH8141              | 0.45             | 247946 $\pm$ 548                  | 78372 $\pm$ 130                   | 951 $\pm$ 15                      | 279 $\pm$ 52                      | 5.186 $\pm$ 4.248                 | 3.143720 $\pm$ 0.016207                         | 99.37                | 93.91 $\pm$ 0.47 |                    | 120.76 | YES     |             |
| NAH8143              | 0.51             | 275917 $\pm$ 627                  | 87455 $\pm$ 147                   | 1066 $\pm$ 15                     | 333 $\pm$ 57                      | 3.558 $\pm$ 3.727                 | 3.142597 $\pm$ 0.012754                         | 99.61                | 93.87 $\pm$ 0.37 |                    | 112.99 | YES     |             |
| NAH8145              | 0.6              | 127339 $\pm$ 294                  | 40204 $\pm$ 83                    | 481 $\pm$ 9                       | 143 $\pm$ 68                      | 2.287 $\pm$ 3.095                 | 3.150060 $\pm$ 0.023003                         | 99.46                | 94.09 $\pm$ 0.67 |                    | 120.81 | YES     |             |
| NAH8147              | 0.75             | 136818 $\pm$ 318                  | 43232 $\pm$ 74                    | 522 $\pm$ 8                       | 130 $\pm$ 54                      | 2.551 $\pm$ 2.988                 | 3.146813 $\pm$ 0.020659                         | 99.43                | 94.00 $\pm$ 0.60 |                    | 143.19 | YES     |             |
| NAH8149              | 1                | 70896 $\pm$ 182                   | 22348 $\pm$ 49                    | 272 $\pm$ 6                       | 94 $\pm$ 58                       | 1.296 $\pm$ 3.102                 | 3.154850 $\pm$ 0.041449                         | 99.45                | 94.23 $\pm$ 1.21 |                    | 102.12 | YES     |             |
| NAH8151              | 2                | 229651 $\pm$ 525                  | 72461 $\pm$ 109                   | 865 $\pm$ 11                      | 265 $\pm$ 64                      | 5.763 $\pm$ 3.308                 | 3.145325 $\pm$ 0.013657                         | 99.24                | 93.95 $\pm$ 0.40 |                    | 117.38 | YES     |             |
| NAH8154              | 12               | 83736 $\pm$ 221                   | 23153 $\pm$ 51                    | 288 $\pm$ 6                       | 77 $\pm$ 64                       | 31.752 $\pm$ 4.125                | 3.206930 $\pm$ 0.053208                         | 88.67                | 95.74 $\pm$ 1.55 |                    | 129.07 |         |             |

Plateau age (7 of 9): 94.00  $\pm$  0.18 MSWD: 0.26

Inverse isochron age (7 of 9): 93.91  $\pm$  0.55

( $^{40}\text{Ar}/^{36}\text{Ar}$ )<sub>trapped</sub> intercept: 329  $\pm$  110

Integrated age (9 of 9): 94.23  $\pm$  0.19



| Sample:<br>Material: | NC-B<br>sanidine |                                   |                                   |                                   |                                   |                                   |                                                 |                      |                  |                    |        |  |             |
|----------------------|------------------|-----------------------------------|-----------------------------------|-----------------------------------|-----------------------------------|-----------------------------------|-------------------------------------------------|----------------------|------------------|--------------------|--------|--|-------------|
|                      | Laser            | $^{40}\text{Ar} \pm 2\sigma_{40}$ | $^{39}\text{Ar} \pm 2\sigma_{39}$ | $^{38}\text{Ar} \pm 2\sigma_{38}$ | $^{37}\text{Ar} \pm 2\sigma_{37}$ | $^{36}\text{Ar} \pm 2\sigma_{36}$ |                                                 |                      |                  |                    |        |  | Included in |
| File                 | Power (%)        | (cps) (cps)                       | $^{40}\text{Ar}^*/^{39}\text{Ar}_K \pm 2\sigma$ | % $^{40}\text{Ar}^*$ | Age (Ma)         | $\pm 2\sigma$ (Ma) | K/Ca   |  | plateau     |
| NAH8157              | 0.3              | 53944 $\pm$ 153                   | 13563 $\pm$ 41                    | 161 $\pm$ 6                       | 169 $\pm$ 52                      | 33.296 $\pm$ 4.010                | 3.244892 $\pm$ 0.088314                         | 81.58                | 96.85 $\pm$ 2.57 |                    | 34.50  |  |             |
| NAH8160              | 0.38             | 128141 $\pm$ 292                  | 40166 $\pm$ 82                    | 485 $\pm$ 9                       | 507 $\pm$ 50                      | 8.432 $\pm$ 3.405                 | 3.128110 $\pm$ 0.025326                         | 98.05                | 93.45 $\pm$ 0.74 |                    | 34.07  |  |             |
| NAH8162              | 0.45             | 337209 $\pm$ 741                  | 106574 $\pm$ 156                  | 1276 $\pm$ 18                     | 1111 $\pm$ 61                     | 13.578 $\pm$ 4.641                | 3.126329 $\pm$ 0.013028                         | 98.81                | 93.40 $\pm$ 0.38 |                    | 41.24  |  |             |
| NAH8164              | 0.51             | 316294 $\pm$ 707                  | 100601 $\pm$ 149                  | 1211 $\pm$ 16                     | 576 $\pm$ 51                      | 2.463 $\pm$ 3.068                 | 3.136649 $\pm$ 0.009146                         | 99.76                | 93.70 $\pm$ 0.27 |                    | 75.09  |  |             |
| NAH8166              | 0.6              | 328782 $\pm$ 752                  | 104378 $\pm$ 227                  | 1262 $\pm$ 17                     | 436 $\pm$ 72                      | 1.825 $\pm$ 3.181                 | 3.144484 $\pm$ 0.009153                         | 99.83                | 93.93 $\pm$ 0.27 |                    | 102.96 |  |             |
| NAH8168              | 0.75             | 631658 $\pm$ 1367                 | 200867 $\pm$ 229                  | 2435 $\pm$ 19                     | 712 $\pm$ 69                      | 3.830 $\pm$ 4.833                 | 3.138714 $\pm$ 0.007225                         | 99.81                | 93.76 $\pm$ 0.21 |                    | 121.33 |  |             |
| NAH8170              | 1.1              | 485192 $\pm$ 1039                 | 153938 $\pm$ 201                  | 1866 $\pm$ 19                     | 533 $\pm$ 49                      | 2.167 $\pm$ 4.429                 | 3.147403 $\pm$ 0.008626                         | 99.86                | 94.01 $\pm$ 0.25 |                    | 124.29 |  |             |
| NAH8172              | 2.2              | 449624 $\pm$ 1036                 | 141339 $\pm$ 174                  | 1697 $\pm$ 18                     | 453 $\pm$ 67                      | 11.010 $\pm$ 3.976                | 3.157635 $\pm$ 0.008439                         | 99.26                | 94.31 $\pm$ 0.25 |                    | 134.07 |  |             |
| NAH8175              | 15               | 235636 $\pm$ 555                  | 73710 $\pm$ 147                   | 875 $\pm$ 12                      | 260 $\pm$ 62                      | 1.845 $\pm$ 3.194                 | 3.189047 $\pm$ 0.012975                         | 99.76                | 95.22 $\pm$ 0.38 |                    | 122.11 |  |             |

no plateau

Integrated age (9 of 9): 94.00  $\pm$  0.11

| Sample:<br>Material: | NC-B<br>sanidine |                                   |                                   |                                   |                                   |                                   |                                                 |                      |                  |                    |        |     |             |
|----------------------|------------------|-----------------------------------|-----------------------------------|-----------------------------------|-----------------------------------|-----------------------------------|-------------------------------------------------|----------------------|------------------|--------------------|--------|-----|-------------|
|                      | Laser            | $^{40}\text{Ar} \pm 2\sigma_{40}$ | $^{39}\text{Ar} \pm 2\sigma_{39}$ | $^{38}\text{Ar} \pm 2\sigma_{38}$ | $^{37}\text{Ar} \pm 2\sigma_{37}$ | $^{36}\text{Ar} \pm 2\sigma_{36}$ |                                                 |                      |                  |                    |        |     | Included in |
| File                 | Power (%)        | (cps) (cps)                       | $^{40}\text{Ar}^*/^{39}\text{Ar}_K \pm 2\sigma$ | % $^{40}\text{Ar}^*$ | Age (Ma)         | $\pm 2\sigma$ (Ma) | K/Ca   |     | plateau     |
| NAH8178              | 0.3              | 40411 $\pm$ 117                   | 11245 $\pm$ 39                    | 135 $\pm$ 5                       | 24 $\pm$ 55                       | 13.378 $\pm$ 3.205                | 3.238061 $\pm$ 0.085102                         | 90.11                | 96.65 $\pm$ 2.47 |                    | 199.70 |     |             |
| NAH8181              | 0.38             | 120245 $\pm$ 286                  | 37603 $\pm$ 117                   | 463 $\pm$ 12                      | 125 $\pm$ 63                      | 6.039 $\pm$ 4.189                 | 3.149511 $\pm$ 0.033286                         | 98.49                | 94.07 $\pm$ 0.97 |                    | 129.21 | YES |             |
| NAH8183              | 0.45             | 234331 $\pm$ 540                  | 74303 $\pm$ 125                   | 905 $\pm$ 15                      | 280 $\pm$ 46                      | 1.249 $\pm$ 3.417                 | 3.148483 $\pm$ 0.013761                         | 99.83                | 94.04 $\pm$ 0.40 |                    | 114.07 | YES |             |
| NAH8185              | 0.51             | 291228 $\pm$ 626                  | 92632 $\pm$ 113                   | 1118 $\pm$ 11                     | 331 $\pm$ 45                      | 0.315 $\pm$ 2.459                 | 3.142672 $\pm$ 0.007966                         | 99.96                | 93.87 $\pm$ 0.23 |                    | 120.16 | YES |             |
| NAH8187              | 0.6              | 515275 $\pm$ 1148                 | 163174 $\pm$ 201                  | 1998 $\pm$ 19                     | 588 $\pm$ 47                      | 3.836 $\pm$ 3.913                 | 3.150571 $\pm$ 0.007204                         | 99.77                | 94.10 $\pm$ 0.21 |                    | 119.33 | YES |             |
| NAH8189              | 0.75             | 190664 $\pm$ 477                  | 60651 $\pm$ 113                   | 726 $\pm$ 13                      | 210 $\pm$ 58                      | 0.438 $\pm$ 4.089                 | 3.141234 $\pm$ 0.020154                         | 99.92                | 93.83 $\pm$ 0.59 |                    | 124.21 | YES |             |
| NAH8191              | 1.1              | 75690 $\pm$ 210                   | 23099 $\pm$ 64                    | 270 $\pm$ 8                       | 67 $\pm$ 63                       | 9.341 $\pm$ 3.907                 | 3.155639 $\pm$ 0.050518                         | 96.31                | 94.25 $\pm$ 1.47 |                    | 148.72 | YES |             |
| NAH8193              | 2.5              | 272666 $\pm$ 673                  | 86092 $\pm$ 155                   | 1038 $\pm$ 17                     | 332 $\pm$ 64                      | 6.227 $\pm$ 3.868                 | 3.145325 $\pm$ 0.013449                         | 99.31                | 93.95 $\pm$ 0.39 |                    | 111.57 | YES |             |
| NAH8196              | 15               | 23044 $\pm$ 90                    | 6589 $\pm$ 28                     | 80 $\pm$ 4                        | 12 $\pm$ 66                       | 6.339 $\pm$ 3.049                 | 3.209636 $\pm$ 0.138161                         | 91.78                | 95.82 $\pm$ 4.02 |                    | 239.12 | YES |             |

Plateau age (8 of 9): 94.00  $\pm$  0.14

MSWD: 0.51

Inverse isochron age (8 of 9): 93.97  $\pm$  0.43

( $^{40}\text{Ar}/^{36}\text{Ar}$ )<sub>trapped</sub> intercept: 344  $\pm$  150

Integrated age (9 of 9): 94.08  $\pm$  0.17

| Sample:<br>Material: | NC-B<br>sanidine |                                   |                                   |                                   |                                   |                                   |                                                 |                      |                   |                    |        |     |             |
|----------------------|------------------|-----------------------------------|-----------------------------------|-----------------------------------|-----------------------------------|-----------------------------------|-------------------------------------------------|----------------------|-------------------|--------------------|--------|-----|-------------|
|                      | Laser            | $^{40}\text{Ar} \pm 2\sigma_{40}$ | $^{39}\text{Ar} \pm 2\sigma_{39}$ | $^{38}\text{Ar} \pm 2\sigma_{38}$ | $^{37}\text{Ar} \pm 2\sigma_{37}$ | $^{36}\text{Ar} \pm 2\sigma_{36}$ |                                                 |                      |                   |                    |        |     | Included in |
| File                 | Power (%)        | (cps) (cps)                       | $^{40}\text{Ar}^*/^{39}\text{Ar}_K \pm 2\sigma$ | % $^{40}\text{Ar}^*$ | Age (Ma)          | $\pm 2\sigma$ (Ma) | K/Ca   |     | plateau     |
| NAH8199              | 0.31             | 55519 $\pm$ 151                   | 15416 $\pm$ 47                    | 183 $\pm$ 5                       | 51 $\pm$ 49                       | 14.531 $\pm$ 3.491                | 3.319615 $\pm$ 0.067629                         | 92.18                | 99.02 $\pm$ 1.96  |                    | 130.13 |     |             |
| NAH8202              | 0.38             | 179077 $\pm$ 446                  | 56571 $\pm$ 108                   | 670 $\pm$ 11                      | 152 $\pm$ 61                      | 0.140 $\pm$ 3.291                 | 3.164448 $\pm$ 0.017399                         | 99.97                | 94.51 $\pm$ 0.51  |                    | 159.78 | YES |             |
| NAH8204              | 0.45             | 319335 $\pm$ 739                  | 101009 $\pm$ 140                  | 1214 $\pm$ 15                     | 266 $\pm$ 51                      | 2.712 $\pm$ 3.766                 | 3.153093 $\pm$ 0.011163                         | 99.74                | 94.18 $\pm$ 0.32  |                    | 163.27 | YES |             |
| NAH8206              | 0.5              | 200095 $\pm$ 468                  | 63199 $\pm$ 120                   | 781 $\pm$ 11                      | 180 $\pm$ 46                      | 3.557 $\pm$ 3.439                 | 3.149024 $\pm$ 0.016275                         | 99.46                | 94.06 $\pm$ 0.47  |                    | 151.05 | YES |             |
| NAH8208              | 0.57             | 140304 $\pm$ 337                  | 44278 $\pm$ 90                    | 532 $\pm$ 8                       | 111 $\pm$ 54                      | 0.923 $\pm$ 3.415                 | 3.162164 $\pm$ 0.023051                         | 99.79                | 94.44 $\pm$ 0.67  |                    | 170.96 | YES |             |
| NAH8210              | 0.75             | 40756 $\pm$ 123                   | 12678 $\pm$ 47                    | 148 $\pm$ 5                       | 21 $\pm$ 35                       | 2.855 $\pm$ 3.009                 | 3.147172 $\pm$ 0.070880                         | 97.90                | 94.01 $\pm$ 2.06  |                    | 254.54 | YES |             |
| NAH8212              | 1.2              | 33184 $\pm$ 103                   | 9969 $\pm$ 36                     | 121 $\pm$ 5                       | 13 $\pm$ 33                       | 4.863 $\pm$ 3.115                 | 3.182797 $\pm$ 0.093311                         | 95.61                | 95.04 $\pm$ 2.72  |                    | 319.20 | YES |             |
| NAH8214              | 15               | 7650 $\pm$ 52                     | 2117 $\pm$ 16                     | 26 $\pm$ 3                        | 16 $\pm$ 48                       | 4.969 $\pm$ 2.718                 | 2.913180 $\pm$ 0.383409                         | 80.61                | 87.18 $\pm$ 11.20 |                    | 57.13  | YES |             |

Plateau age (7 of 8): 94.25  $\pm$  0.22

MSWD: 0.70

Inverse isochron age (7 of 8): 94.31  $\pm$  0.44

( $^{40}\text{Ar}/^{36}\text{Ar}$ )<sub>trapped</sub> intercept: 252  $\pm$  180

Integrated age (8 of 8): 94.47  $\pm$  0.26

| Sample:<br>Material: | NC-B<br>sanidine |                                   |                                   |                                   |                                   |                                   |                                                 |                      |                  |                    |        |     |             |
|----------------------|------------------|-----------------------------------|-----------------------------------|-----------------------------------|-----------------------------------|-----------------------------------|-------------------------------------------------|----------------------|------------------|--------------------|--------|-----|-------------|
|                      | Laser            | $^{40}\text{Ar} \pm 2\sigma_{40}$ | $^{39}\text{Ar} \pm 2\sigma_{39}$ | $^{38}\text{Ar} \pm 2\sigma_{38}$ | $^{37}\text{Ar} \pm 2\sigma_{37}$ | $^{36}\text{Ar} \pm 2\sigma_{36}$ |                                                 |                      |                  |                    |        |     | Included in |
| File                 | Power (%)        | (cps) (cps)                       | $^{40}\text{Ar}^*/^{39}\text{Ar}_K \pm 2\sigma$ | % $^{40}\text{Ar}^*$ | Age (Ma)         | $\pm 2\sigma$ (Ma) | K/Ca   |     | plateau     |
| NAH8219              | 0.32             | 157612 $\pm$ 340                  | 46242 $\pm$ 83                    | 562 $\pm$ 9                       | 144 $\pm$ 58                      | 35.212 $\pm$ 4.146                | 3.180811 $\pm$ 0.026786                         | 93.32                | 94.98 $\pm$ 0.78 |                    | 137.88 |     |             |
| NAH8222              | 0.39             | 298607 $\pm$ 588                  | 94493 $\pm$ 112                   | 1154 $\pm$ 12                     | 334 $\pm$ 61                      | 9.370 $\pm$ 3.494                 | 3.130242 $\pm$ 0.011065                         | 99.06                | 93.51 $\pm$ 0.32 |                    | 121.78 |     |             |
| NAH8224              | 0.45             | 515228 $\pm$ 1162                 | 163621 $\pm$ 166                  | 1968 $\pm$ 19                     | 615 $\pm$ 69                      | 1.675 $\pm$ 3.723                 | 3.145622 $\pm$ 0.006839                         | 99.90                | 93.96 $\pm$ 0.20 |                    | 114.38 | YES |             |
| NAH8226              | 0.5              | 483573 $\pm$ 1096                 | 153273 $\pm$ 215                  | 1846 $\pm$ 19                     | 614 $\pm$ 76                      | 3.231 $\pm$ 4.262                 | 3.148473 $\pm$ 0.008346                         | 99.79                | 94.04 $\pm$ 0.24 |                    | 107.32 | YES |             |
| NAH8228              | 0.57             | 334435 $\pm$ 759                  | 105776 $\pm$ 121                  | 1262 $\pm$ 16                     | 426 $\pm$ 65                      | 2.735 $\pm$ 3.744                 | 3.153789 $\pm$ 0.010597                         | 99.75                | 94.20 $\pm$ 0.31 |                    | 106.75 | YES |             |
| NAH8230              | 0.75             | 156689 $\pm$ 365                  | 49434 $\pm$ 83                    | 592 $\pm$ 9                       | 189 $\pm$ 48                      | 3.782 $\pm$ 3.051                 | 3.146620 $\pm$ 0.018450                         | 99.27                | 93.99 $\pm$ 0.54 |                    | 112.47 | YES |             |
| NAH8232              | 1.2              | 164383 $\pm$ 400                  | 51631 $\pm$ 98                    | 622 $\pm$ 10                      | 198 $\pm$ 62                      | 4.034 $\pm$ 3.687                 | 3.160231 $\pm$ 0.021341                         | 99.26                | 94.39 $\pm$ 0.62 |                    | 112.36 | YES |             |
| NAH8234              | 15               | 25292 $\pm$ 92                    | 7655 $\pm$ 27                     | 88 $\pm$ 4                        | 42 $\pm$ 45                       | 2.270 $\pm$ 3.300                 | 3.215170 $\pm$ 0.128701                         | 97.32                | 95.98 $\pm$ 3.74 |                    | 77.65  | YES |             |

Plateau age (6 of 8): 94.05  $\pm$  0.14 MSWD: 0.80  
 Inverse isochron age (6 of 8): 94.00  $\pm$  5.60  
 ( $^{40}\text{Ar}/^{36}\text{Ar}$ )<sub>trapped</sub> intercept: 461  $\pm$  450  
 Integrated age (8 of 8): 94.08  $\pm$  0.13

| Sample:<br>Material: | NC-B<br>sanidine |                                   |                                   |                                   |                                   |                                   |                                                 |                      |                  |                    |        |     |             |
|----------------------|------------------|-----------------------------------|-----------------------------------|-----------------------------------|-----------------------------------|-----------------------------------|-------------------------------------------------|----------------------|------------------|--------------------|--------|-----|-------------|
|                      | Laser            | $^{40}\text{Ar} \pm 2\sigma_{40}$ | $^{39}\text{Ar} \pm 2\sigma_{39}$ | $^{38}\text{Ar} \pm 2\sigma_{38}$ | $^{37}\text{Ar} \pm 2\sigma_{37}$ | $^{36}\text{Ar} \pm 2\sigma_{36}$ |                                                 |                      |                  |                    |        |     | Included in |
| File                 | Power (%)        | (cps) (cps)                       | $^{40}\text{Ar}^*/^{39}\text{Ar}_K \pm 2\sigma$ | % $^{40}\text{Ar}^*$ | Age (Ma)         | $\pm 2\sigma$ (Ma) | K/Ca   |     | plateau     |
| NAH8815              | 0.4              | 404590 $\pm$ 822                  | 123298 $\pm$ 145                  | 1502 $\pm$ 16                     | 443 $\pm$ 59                      | 52.290 $\pm$ 4.572                | 3.154528 $\pm$ 0.011095                         | 96.13                | 94.22 $\pm$ 0.32 |                    | 119.58 | YES |             |
| NAH8818              | 0.46             | 417826 $\pm$ 803                  | 131721 $\pm$ 209                  | 1590 $\pm$ 16                     | 453 $\pm$ 69                      | 7.814 $\pm$ 3.347                 | 3.154074 $\pm$ 0.007627                         | 99.43                | 94.21 $\pm$ 0.22 |                    | 124.91 | YES |             |
| NAH8820              | 0.52             | 234298 $\pm$ 508                  | 74096 $\pm$ 148                   | 888 $\pm$ 13                      | 320 $\pm$ 63                      | 2.614 $\pm$ 3.608                 | 3.151341 $\pm$ 0.014567                         | 99.66                | 94.13 $\pm$ 0.42 |                    | 99.60  | YES |             |
| NAH8822              | 0.6              | 168965 $\pm$ 380                  | 53416 $\pm$ 110                   | 627 $\pm$ 12                      | 202 $\pm$ 43                      | 2.083 $\pm$ 3.583                 | 3.151322 $\pm$ 0.020048                         | 99.62                | 94.13 $\pm$ 0.58 |                    | 113.82 | YES |             |
| NAH8824              | 0.8              | 146369 $\pm$ 348                  | 46268 $\pm$ 123                   | 545 $\pm$ 11                      | 171 $\pm$ 56                      | 4.096 $\pm$ 3.991                 | 3.136846 $\pm$ 0.025778                         | 99.16                | 93.71 $\pm$ 0.75 |                    | 116.09 | YES |             |
| NAH8826              | 1.5              | 148860 $\pm$ 342                  | 46943 $\pm$ 116                   | 562 $\pm$ 12                      | 178 $\pm$ 51                      | 3.132 $\pm$ 3.929                 | 3.150914 $\pm$ 0.025009                         | 99.36                | 94.11 $\pm$ 0.73 |                    | 113.35 | YES |             |
| NAH8828              | 5                | 156746 $\pm$ 366                  | 49410 $\pm$ 131                   | 581 $\pm$ 13                      | 180 $\pm$ 46                      | 4.136 $\pm$ 3.501                 | 3.147072 $\pm$ 0.021182                         | 99.20                | 94.00 $\pm$ 0.62 |                    | 117.93 | YES |             |
| NAH8829              | 9                | 25370 $\pm$ 82                    | 7647 $\pm$ 32                     | 95 $\pm$ 5                        | 37 $\pm$ 60                       | 2.998 $\pm$ 2.959                 | 3.200520 $\pm$ 0.115541                         | 96.47                | 95.56 $\pm$ 3.36 |                    | 89.42  | YES |             |

Plateau age (8 of 8): 94.16  $\pm$  0.15 MSWD: 0.40  
 Inverse isochron age (8 of 8): 94.14  $\pm$  0.41  
 ( $^{40}\text{Ar}/^{36}\text{Ar}$ )<sub>trapped</sub> intercept: 308  $\pm$  61  
 Integrated age (8 of 8): 94.14  $\pm$  0.17

| Sample:<br>Material: | NC-C<br>sanidine |                                   |                                   |                                   |                                   |                                   |                                                 |                      |                  |                    |        |  |             |
|----------------------|------------------|-----------------------------------|-----------------------------------|-----------------------------------|-----------------------------------|-----------------------------------|-------------------------------------------------|----------------------|------------------|--------------------|--------|--|-------------|
|                      | Laser            | $^{40}\text{Ar} \pm 2\sigma_{40}$ | $^{39}\text{Ar} \pm 2\sigma_{39}$ | $^{38}\text{Ar} \pm 2\sigma_{38}$ | $^{37}\text{Ar} \pm 2\sigma_{37}$ | $^{36}\text{Ar} \pm 2\sigma_{36}$ |                                                 |                      |                  |                    |        |  | Included in |
| File                 | Power (%)        | (cps) (cps)                       | $^{40}\text{Ar}^*/^{39}\text{Ar}_K \pm 2\sigma$ | % $^{40}\text{Ar}^*$ | Age (Ma)         | $\pm 2\sigma$ (Ma) | K/Ca   |  | plateau     |
| NAH8266              | 0.32             | 108725 $\pm$ 249                  | 32716 $\pm$ 82                    | 389 $\pm$ 7                       | 127 $\pm$ 61                      | 12.336 $\pm$ 3.366                | 3.210519 $\pm$ 0.030736                         | 96.61                | 95.85 $\pm$ 0.89 |                    | 110.72 |  |             |
| NAH8269              | 0.39             | 317197 $\pm$ 663                  | 100090 $\pm$ 163                  | 1211 $\pm$ 17                     | 363 $\pm$ 48                      | 6.259 $\pm$ 3.535                 | 3.150207 $\pm$ 0.010579                         | 99.40                | 94.09 $\pm$ 0.31 |                    | 118.53 |  |             |
| NAH8271              | 0.45             | 543977 $\pm$ 1172                 | 172095 $\pm$ 184                  | 2086 $\pm$ 21                     | 687 $\pm$ 68                      | 1.775 $\pm$ 3.449                 | 3.157623 $\pm$ 0.006032                         | 99.90                | 94.31 $\pm$ 0.18 |                    | 107.76 |  |             |
| NAH8273              | 0.5              | 538841 $\pm$ 1178                 | 169856 $\pm$ 238                  | 2064 $\pm$ 18                     | 634 $\pm$ 55                      | 2.099 $\pm$ 3.444                 | 3.168416 $\pm$ 0.006109                         | 99.88                | 94.62 $\pm$ 0.18 |                    | 115.28 |  |             |
| NAH8275              | 0.7              | 176847 $\pm$ 400                  | 55390 $\pm$ 78                    | 665 $\pm$ 9                       | 215 $\pm$ 49                      | 3.720 $\pm$ 3.071                 | 3.172457 $\pm$ 0.016573                         | 99.36                | 94.74 $\pm$ 0.48 |                    | 110.62 |  |             |
| NAH8277              | 1                | 101814 $\pm$ 248                  | 31686 $\pm$ 61                    | 380 $\pm$ 7                       | 131 $\pm$ 58                      | 3.562 $\pm$ 3.216                 | 3.179429 $\pm$ 0.030317                         | 98.95                | 94.94 $\pm$ 0.88 |                    | 103.88 |  |             |
| NAH8279              | 15               | 25772 $\pm$ 92                    | 7897 $\pm$ 35                     | 91 $\pm$ 4                        | 29 $\pm$ 45                       | 4.293 $\pm$ 3.342                 | 3.100939 $\pm$ 0.126351                         | 95.02                | 92.66 $\pm$ 3.68 |                    | 118.82 |  |             |

no plateau  
 Integrated age (7 of 7): 94.51  $\pm$  0.14

| Sample:<br>Material: | NC-C<br>sanidine |                                   |                                   |                                   |                                   |                                   |                                                 |                      |                  |                    |        |     | Included in |
|----------------------|------------------|-----------------------------------|-----------------------------------|-----------------------------------|-----------------------------------|-----------------------------------|-------------------------------------------------|----------------------|------------------|--------------------|--------|-----|-------------|
|                      | Laser            | $^{40}\text{Ar} \pm 2\sigma_{40}$ | $^{39}\text{Ar} \pm 2\sigma_{39}$ | $^{38}\text{Ar} \pm 2\sigma_{38}$ | $^{37}\text{Ar} \pm 2\sigma_{37}$ | $^{36}\text{Ar} \pm 2\sigma_{36}$ |                                                 |                      |                  |                    |        |     |             |
| File                 | Power (%)        | (cps) (cps)                       | $^{40}\text{Ar}^*/^{39}\text{Ar}_K \pm 2\sigma$ | % $^{40}\text{Ar}^*$ | Age (Ma)         | $\pm 2\sigma$ (Ma) | K/Ca   |     | plateau     |
| NAH8287              | 0.32             | 239925 $\pm$ 580                  | 73875 $\pm$ 102                   | 880 $\pm$ 11                      | 296 $\pm$ 56                      | 14.097 $\pm$ 3.369                | 3.190510 $\pm$ 0.013644                         | 98.24                | 95.27 $\pm$ 0.40 |                    | 107.25 |     |             |
| NAH8290              | 0.39             | 315417 $\pm$ 709                  | 99562 $\pm$ 121                   | 1223 $\pm$ 10                     | 396 $\pm$ 46                      | 5.514 $\pm$ 2.380                 | 3.151286 $\pm$ 0.007183                         | 99.47                | 94.13 $\pm$ 0.21 |                    | 108.02 | YES |             |
| NAH8292              | 0.44             | 257069 $\pm$ 594                  | 81415 $\pm$ 124                   | 990 $\pm$ 14                      | 358 $\pm$ 58                      | 3.430 $\pm$ 2.465                 | 3.144760 $\pm$ 0.009083                         | 99.60                | 93.94 $\pm$ 0.26 |                    | 97.83  | YES |             |
| NAH8294              | 0.48             | 534240 $\pm$ 1181                 | 169021 $\pm$ 204                  | 2049 $\pm$ 16                     | 757 $\pm$ 62                      | 7.319 $\pm$ 3.519                 | 3.147688 $\pm$ 0.006268                         | 99.59                | 94.02 $\pm$ 0.18 |                    | 96.00  | YES |             |
| NAH8296              | 0.52             | 288267 $\pm$ 640                  | 91065 $\pm$ 183                   | 1098 $\pm$ 12                     | 371 $\pm$ 49                      | 5.947 $\pm$ 3.123                 | 3.145809 $\pm$ 0.010282                         | 99.38                | 93.97 $\pm$ 0.30 |                    | 105.56 | YES |             |
| NAH8298              | 0.59             | 165035 $\pm$ 381                  | 51953 $\pm$ 99                    | 627 $\pm$ 10                      | 215 $\pm$ 56                      | 2.957 $\pm$ 3.018                 | 3.159391 $\pm$ 0.017367                         | 99.46                | 94.36 $\pm$ 0.51 |                    | 103.97 | YES |             |
| NAH8300              | 0.75             | 90218 $\pm$ 235                   | 28303 $\pm$ 74                    | 343 $\pm$ 8                       | 125 $\pm$ 53                      | 3.520 $\pm$ 2.975                 | 3.150261 $\pm$ 0.031406                         | 98.83                | 94.10 $\pm$ 0.91 |                    | 97.73  | YES |             |
| NAH8302              | 1.5              | 96146 $\pm$ 225                   | 30132 $\pm$ 62                    | 358 $\pm$ 6                       | 108 $\pm$ 43                      | 3.983 $\pm$ 2.916                 | 3.151071 $\pm$ 0.028908                         | 98.75                | 94.12 $\pm$ 0.84 |                    | 119.94 | YES |             |
| NAH8305              | 13               | 172457 $\pm$ 375                  | 53445 $\pm$ 88                    | 642 $\pm$ 10                      | 231 $\pm$ 45                      | 5.322 $\pm$ 3.148                 | 3.196912 $\pm$ 0.017608                         | 99.07                | 95.45 $\pm$ 0.51 |                    | 99.32  |     |             |

Plateau age (7 of 9): 94.05  $\pm$  0.11 MSWD: 0.54  
Inverse isochron age (7 of 9): 93.90  $\pm$  1.40  
( $^{40}\text{Ar}/^{36}\text{Ar}$ )<sub>trapped</sub> intercept: 393  $\pm$  480  
Integrated age (9 of 9): 94.30  $\pm$  0.12

| Sample:<br>Material: | NC-C<br>sanidine |                                   |                                   |                                   |                                   |                                   |                                                 |                      |                  |                    |        |  | Included in |
|----------------------|------------------|-----------------------------------|-----------------------------------|-----------------------------------|-----------------------------------|-----------------------------------|-------------------------------------------------|----------------------|------------------|--------------------|--------|--|-------------|
|                      | Laser            | $^{40}\text{Ar} \pm 2\sigma_{40}$ | $^{39}\text{Ar} \pm 2\sigma_{39}$ | $^{38}\text{Ar} \pm 2\sigma_{38}$ | $^{37}\text{Ar} \pm 2\sigma_{37}$ | $^{36}\text{Ar} \pm 2\sigma_{36}$ |                                                 |                      |                  |                    |        |  |             |
| File                 | Power (%)        | (cps) (cps)                       | $^{40}\text{Ar}^*/^{39}\text{Ar}_K \pm 2\sigma$ | % $^{40}\text{Ar}^*$ | Age (Ma)         | $\pm 2\sigma$ (Ma) | K/Ca   |  | plateau     |
| NAH8315              | 0.48             | 13641 $\pm$ 71                    | 4106 $\pm$ 28                     | 48 $\pm$ 4                        | 55 $\pm$ 53                       | 3.320 $\pm$ 3.081                 | 3.081157 $\pm$ 0.224073                         | 92.75                | 92.08 $\pm$ 6.53 |                    | 32.23  |  |             |
| NAH8317              | 0.52             | 17519 $\pm$ 72                    | 5323 $\pm$ 30                     | 65 $\pm$ 5                        | 36 $\pm$ 53                       | 3.610 $\pm$ 3.226                 | 3.088926 $\pm$ 0.180964                         | 93.85                | 92.31 $\pm$ 5.27 |                    | 63.39  |  |             |
| NAH8319              | 0.59             | 40001 $\pm$ 118                   | 12660 $\pm$ 43                    | 155 $\pm$ 5                       | 64 $\pm$ 54                       | 2.668 $\pm$ 2.900                 | 3.096567 $\pm$ 0.068416                         | 98.00                | 92.53 $\pm$ 1.99 |                    | 85.20  |  |             |
| NAH8321              | 0.75             | 248376 $\pm$ 551                  | 79572 $\pm$ 122                   | 977 $\pm$ 15                      | 266 $\pm$ 65                      | 5.250 $\pm$ 3.528                 | 3.101459 $\pm$ 0.013266                         | 99.36                | 92.67 $\pm$ 0.39 |                    | 128.56 |  |             |
| NAH8323              | 1.5              | 476407 $\pm$ 988                  | 151560 $\pm$ 161                  | 1856 $\pm$ 13                     | 575 $\pm$ 71                      | 0.122 $\pm$ 2.184                 | 3.142894 $\pm$ 0.004366                         | 99.98                | 93.88 $\pm$ 0.13 |                    | 113.37 |  |             |
| NAH8326              | 13               | 584354 $\pm$ 1196                 | 183973 $\pm$ 150                  | 2246 $\pm$ 15                     | 749 $\pm$ 65                      | 8.160 $\pm$ 3.232                 | 3.162860 $\pm$ 0.005291                         | 99.58                | 94.46 $\pm$ 0.15 |                    | 105.57 |  |             |
| NAH8350              | 18               | 169800 $\pm$ 383                  | 52527 $\pm$ 83                    | 626 $\pm$ 8                       | 212 $\pm$ 59                      | 8.395 $\pm$ 3.029                 | 3.184688 $\pm$ 0.017239                         | 98.52                | 95.10 $\pm$ 0.50 |                    | 106.50 |  |             |
| NAH8353              | 23               | 26806 $\pm$ 95                    | 7662 $\pm$ 34                     | 89 $\pm$ 4                        | 35 $\pm$ 57                       | 6.483 $\pm$ 2.818                 | 3.245838 $\pm$ 0.109816                         | 92.77                | 96.88 $\pm$ 3.19 |                    | 94.28  |  |             |

no plateau  
Integrated age (8 of 8): 94.01  $\pm$  0.15

| Sample:<br>Material: | NC-C<br>sanidine |                                   |                                   |                                   |                                   |                                   |                                                 |                      |                  |                    |        |  | Included in |
|----------------------|------------------|-----------------------------------|-----------------------------------|-----------------------------------|-----------------------------------|-----------------------------------|-------------------------------------------------|----------------------|------------------|--------------------|--------|--|-------------|
|                      | Laser            | $^{40}\text{Ar} \pm 2\sigma_{40}$ | $^{39}\text{Ar} \pm 2\sigma_{39}$ | $^{38}\text{Ar} \pm 2\sigma_{38}$ | $^{37}\text{Ar} \pm 2\sigma_{37}$ | $^{36}\text{Ar} \pm 2\sigma_{36}$ |                                                 |                      |                  |                    |        |  |             |
| File                 | Power (%)        | (cps) (cps)                       | $^{40}\text{Ar}^*/^{39}\text{Ar}_K \pm 2\sigma$ | % $^{40}\text{Ar}^*$ | Age (Ma)         | $\pm 2\sigma$ (Ma) | K/Ca   |  | plateau     |
| NAH8329              | 0.32             | 25166 $\pm$ 90                    | 6910 $\pm$ 31                     | 80 $\pm$ 4                        | 42 $\pm$ 53                       | 9.481 $\pm$ 3.273                 | 3.232112 $\pm$ 0.141429                         | 88.75                | 96.48 $\pm$ 4.11 |                    | 71.09  |  |             |
| NAH8332              | 0.39             | 44030 $\pm$ 139                   | 13705 $\pm$ 45                    | 172 $\pm$ 7                       | 77 $\pm$ 65                       | 5.339 $\pm$ 3.242                 | 3.096283 $\pm$ 0.070633                         | 96.38                | 92.52 $\pm$ 2.06 |                    | 76.36  |  |             |
| NAH8334              | 0.44             | 22784 $\pm$ 93                    | 7130 $\pm$ 30                     | 83 $\pm$ 5                        | 25 $\pm$ 43                       | 3.163 $\pm$ 3.422                 | 3.062913 $\pm$ 0.143303                         | 95.85                | 91.55 $\pm$ 4.18 |                    | 121.91 |  |             |
| NAH8336              | 0.48             | 162443 $\pm$ 425                  | 51930 $\pm$ 101                   | 636 $\pm$ 11                      | 205 $\pm$ 60                      | 5.949 $\pm$ 3.433                 | 3.093677 $\pm$ 0.019765                         | 98.90                | 92.45 $\pm$ 0.58 |                    | 108.71 |  |             |
| NAH8338              | 0.52             | 105813 $\pm$ 249                  | 33812 $\pm$ 80                    | 407 $\pm$ 8                       | 160 $\pm$ 40                      | 3.744 $\pm$ 3.072                 | 3.096246 $\pm$ 0.027143                         | 98.94                | 92.52 $\pm$ 0.79 |                    | 90.64  |  |             |
| NAH8340              | 0.59             | 75105 $\pm$ 187                   | 23949 $\pm$ 57                    | 292 $\pm$ 7                       | 107 $\pm$ 53                      | 5.592 $\pm$ 2.881                 | 3.066117 $\pm$ 0.035930                         | 97.77                | 91.64 $\pm$ 1.05 |                    | 95.89  |  |             |
| NAH8342              | 0.75             | 329357 $\pm$ 723                  | 104999 $\pm$ 139                  | 1277 $\pm$ 14                     | 443 $\pm$ 55                      | 4.125 $\pm$ 3.289                 | 3.124828 $\pm$ 0.009387                         | 99.62                | 93.36 $\pm$ 0.27 |                    | 101.99 |  |             |
| NAH8344              | 1.5              | 138220 $\pm$ 327                  | 43914 $\pm$ 89                    | 535 $\pm$ 8                       | 199 $\pm$ 47                      | 1.593 $\pm$ 3.052                 | 3.136478 $\pm$ 0.020774                         | 99.65                | 93.69 $\pm$ 0.60 |                    | 95.10  |  |             |
| NAH8347              | 13               | 166547 $\pm$ 377                  | 51836 $\pm$ 99                    | 627 $\pm$ 10                      | 246 $\pm$ 47                      | 10.475 $\pm$ 3.097                | 3.152499 $\pm$ 0.017862                         | 98.12                | 94.16 $\pm$ 0.52 |                    | 90.78  |  |             |
| NAH8356              | 20               | 17496 $\pm$ 72                    | 4295 $\pm$ 25                     | 54 $\pm$ 5                        | 25 $\pm$ 69                       | 13.488 $\pm$ 2.874                | 3.135865 $\pm$ 0.199836                         | 76.98                | 93.68 $\pm$ 5.82 |                    | 75.09  |  |             |

no plateau  
Integrated age (10 of 10): 93.18  $\pm$  0.25

| Sample:<br>Material: | NC-C<br>sanidine |                                   |                                   |                                   |                                   |                                   |                                                 |                      |                  |                    |             |         |
|----------------------|------------------|-----------------------------------|-----------------------------------|-----------------------------------|-----------------------------------|-----------------------------------|-------------------------------------------------|----------------------|------------------|--------------------|-------------|---------|
|                      | Laser            | $^{40}\text{Ar} \pm 2\sigma_{40}$ | $^{39}\text{Ar} \pm 2\sigma_{39}$ | $^{38}\text{Ar} \pm 2\sigma_{38}$ | $^{37}\text{Ar} \pm 2\sigma_{37}$ | $^{36}\text{Ar} \pm 2\sigma_{36}$ |                                                 |                      |                  |                    | Included in |         |
| File                 | Power (%)        | (cps) (cps)                       | $^{40}\text{Ar}^*/^{39}\text{Ar}_K \pm 2\sigma$ | % $^{40}\text{Ar}^*$ | Age (Ma)         | $\pm 2\sigma$ (Ma) | K/Ca        | plateau |
| NAH8359              | 0.33             | 138120 $\pm$ 355                  | 42801 $\pm$ 97                    | 511 $\pm$ 11                      | 196 $\pm$ 57                      | 11.510 $\pm$ 4.044                | 3.146554 $\pm$ 0.028231                         | 97.51                | 93.99 $\pm$ 0.82 |                    | 93.98       | YES     |
| NAH8362              | 0.4              | 386281 $\pm$ 825                  | 121464 $\pm$ 147                  | 1482 $\pm$ 15                     | 508 $\pm$ 55                      | 15.024 $\pm$ 3.664                | 3.143084 $\pm$ 0.009039                         | 98.83                | 93.89 $\pm$ 0.26 |                    | 102.85      | YES     |
| NAH8364              | 0.44             | 250520 $\pm$ 561                  | 79101 $\pm$ 133                   | 956 $\pm$ 13                      | 334 $\pm$ 57                      | 5.436 $\pm$ 3.364                 | 3.146364 $\pm$ 0.012729                         | 99.35                | 93.98 $\pm$ 0.37 |                    | 101.69      | YES     |
| NAH8366              | 0.48             | 104755 $\pm$ 256                  | 32830 $\pm$ 65                    | 389 $\pm$ 10                      | 135 $\pm$ 54                      | 4.770 $\pm$ 3.561                 | 3.147254 $\pm$ 0.032398                         | 98.63                | 94.01 $\pm$ 0.94 |                    | 104.89      | YES     |
| NAH8368              | 0.55             | 28887 $\pm$ 105                   | 8885 $\pm$ 35                     | 104 $\pm$ 6                       | 46 $\pm$ 60                       | 1.824 $\pm$ 2.974                 | 3.189848 $\pm$ 0.099937                         | 98.11                | 95.25 $\pm$ 2.91 |                    | 83.70       | YES     |
| NAH8370              | 20               | 12304 $\pm$ 66                    | 3691 $\pm$ 23                     | 42 $\pm$ 5                        | 19 $\pm$ 44                       | 2.843 $\pm$ 2.925                 | 3.103496 $\pm$ 0.236621                         | 93.10                | 92.73 $\pm$ 6.89 |                    | 83.40       | YES     |

Plateau age (6 of 6): 93.93  $\pm$  0.21 MSWD: 0.24

Inverse isochron age (6 of 6): 93.90  $\pm$  2.30

( $^{40}\text{Ar}/^{36}\text{Ar}$ )<sub>trapped</sub> intercept: 300  $\pm$  240

Integrated age (6 of 6): 93.97  $\pm$  0.25

| Sample:<br>Material: | NC-C<br>sanidine   |                                                    |                                                    |                                                    |                                                    |                                                    |                                                       |                     |              |           |        | Included in |
|----------------------|--------------------|----------------------------------------------------|----------------------------------------------------|----------------------------------------------------|----------------------------------------------------|----------------------------------------------------|-------------------------------------------------------|---------------------|--------------|-----------|--------|-------------|
| File                 | Laser<br>Power (%) | <sup>40</sup> Ar ± 2σ <sub>40</sub><br>(cps) (cps) | <sup>39</sup> Ar ± 2σ <sub>39</sub><br>(cps) (cps) | <sup>38</sup> Ar ± 2σ <sub>38</sub><br>(cps) (cps) | <sup>37</sup> Ar ± 2σ <sub>37</sub><br>(cps) (cps) | <sup>36</sup> Ar ± 2σ <sub>36</sub><br>(cps) (cps) | <sup>40</sup> Ar*/ <sup>39</sup> Ar <sub>K</sub> ± 2σ | % <sup>40</sup> Ar* | Age (Ma)     | ± 2σ (Ma) | K/Ca   | plateau     |
| NAH8383              | 0.4                | 201797 ± 474                                       | 63523 ± 143                                        | 773 ± 15                                           | 269 ± 61                                           | 4.614 ± 3.988                                      | 3.154864 ± 0.018770                                   | 99.31               | 94.23 ± 0.55 |           | 101.37 | YES         |
| NAH8385              | 0.44               | 86736 ± 238                                        | 27378 ± 83                                         | 325 ± 9                                            | 93 ± 69                                            | 2.830 ± 3.652                                      | 3.136940 ± 0.039845                                   | 99.02               | 93.71 ± 1.16 |           | 125.98 | YES         |
| NAH8387              | 0.48               | 97034 ± 265                                        | 30607 ± 76                                         | 369 ± 9                                            | 125 ± 59                                           | 4.252 ± 4.203                                      | 3.128670 ± 0.041015                                   | 98.68               | 93.47 ± 1.19 |           | 105.20 | YES         |
| NAH8389              | 0.52               | 118042 ± 306                                       | 37143 ± 95                                         | 444 ± 9                                            | 147 ± 53                                           | 3.620 ± 3.648                                      | 3.148700 ± 0.029342                                   | 99.08               | 94.05 ± 0.85 |           | 108.77 | YES         |
| NAH8391              | 0.6                | 74268 ± 198                                        | 23263 ± 53                                         | 275 ± 7                                            | 110 ± 66                                           | 4.984 ± 3.090                                      | 3.128348 ± 0.039675                                   | 97.99               | 93.46 ± 1.16 |           | 91.09  | YES         |
| NAH8393              | 0.8                | 51019 ± 147                                        | 15994 ± 43                                         | 191 ± 6                                            | 66 ± 34                                            | 2.090 ± 3.159                                      | 3.150696 ± 0.058989                                   | 98.77               | 94.11 ± 1.72 |           | 104.89 | YES         |
| NAH8395              | 1.5                | 68621 ± 203                                        | 20302 ± 56                                         | 245 ± 7                                            | 64 ± 41                                            | 15.501 ± 4.097                                     | 3.151755 ± 0.060261                                   | 93.25               | 94.14 ± 1.75 |           | 136.04 | YES         |
| NAH8398              | 15                 | 90224 ± 243                                        | 27722 ± 58                                         | 330 ± 7                                            | 87 ± 40                                            | 7.589 ± 3.356                                      | 3.172530 ± 0.036163                                   | 97.48               | 94.74 ± 1.05 |           | 137.45 | YES         |

Plateau age (8 of 8): 94.07  $\pm$  0.35 MSWD: 0.65

Inverse isochron age (8 of 8): 94.00  $\pm$  1.10

( $^{40}\text{Ar}/^{36}\text{Ar}$ )<sub>trapped</sub> intercept: 315  $\pm$  140

Integrated age (8 of 8): 94.02  $\pm$  0.37

| Sample:<br>Material: | NC-C<br>sanidine |                                   |                                   |                                   |                                   |                                   |                                                 |                      |                     |                    |        |             |
|----------------------|------------------|-----------------------------------|-----------------------------------|-----------------------------------|-----------------------------------|-----------------------------------|-------------------------------------------------|----------------------|---------------------|--------------------|--------|-------------|
|                      | Laser            | $^{40}\text{Ar} \pm 2\sigma_{40}$ | $^{39}\text{Ar} \pm 2\sigma_{39}$ | $^{38}\text{Ar} \pm 2\sigma_{38}$ | $^{37}\text{Ar} \pm 2\sigma_{37}$ | $^{36}\text{Ar} \pm 2\sigma_{36}$ |                                                 |                      |                     |                    |        | Included in |
| File                 | Power (%)        | (cps) (cps)                       | $^{40}\text{Ar}^*/^{39}\text{Ar}_K \pm 2\sigma$ | % $^{40}\text{Ar}^*$ | Age (Ma)            | $\pm 2\sigma$ (Ma) | K/Ca   | plateau     |
| NAH8404              | 0.33             | 51636 $\pm$ 141                   | 13928 $\pm$ 45                    | 167 $\pm$ 6                       | 98 $\pm$ 46                       | 17.672 $\pm$ 3.454                | 3.328495 $\pm$ 0.074049                         | 89.78                | 99.28 $\pm$ 2.15    |                    | 61.26  |             |
| NAH8407              | 0.4              | 74636 $\pm$ 181                   | 23408 $\pm$ 58                    | 285 $\pm$ 6                       | 94 $\pm$ 53                       | 3.747 $\pm$ 2.920                 | 3.140400 $\pm$ 0.037266                         | 98.49                | 93.81 $\pm$ 1.09    |                    | 106.93 | YES         |
| NAH8409              | 0.44             | 36011 $\pm$ 108                   | 11094 $\pm$ 43                    | 136 $\pm$ 5                       | 37 $\pm$ 59                       | 2.446 $\pm$ 3.094                 | 3.179792 $\pm$ 0.083289                         | 97.96                | 94.96 $\pm$ 2.42    |                    | 130.66 | YES         |
| NAH8411              | 0.48             | 245447 $\pm$ 531                  | 78097 $\pm$ 110                   | 956 $\pm$ 12                      | 341 $\pm$ 51                      | 0.561 $\pm$ 2.972                 | 3.140524 $\pm$ 0.011393                         | 99.93                | 93.81 $\pm$ 0.33    |                    | 98.62  | YES         |
| NAH8413              | 0.52             | 176736 $\pm$ 408                  | 56033 $\pm$ 96                    | 691 $\pm$ 12                      | 205 $\pm$ 70                      | 1.570 $\pm$ 2.960                 | 3.145550 $\pm$ 0.015796                         | 99.73                | 93.96 $\pm$ 0.46    |                    | 117.59 | YES         |
| NAH8415              | 0.6              | 170703 $\pm$ 395                  | 53915 $\pm$ 93                    | 644 $\pm$ 12                      | 232 $\pm$ 72                      | 1.770 $\pm$ 3.519                 | 3.156143 $\pm$ 0.019510                         | 99.68                | 94.27 $\pm$ 0.57    |                    | 100.02 | YES         |
| NAH8417              | 0.85             | 131637 $\pm$ 309                  | 41469 $\pm$ 94                    | 504 $\pm$ 10                      | 153 $\pm$ 69                      | 2.638 $\pm$ 3.732                 | 3.155120 $\pm$ 0.026892                         | 99.39                | 94.24 $\pm$ 0.78    |                    | 116.46 | YES         |
| NAH8419              | 2                | 127328 $\pm$ 320                  | 39815 $\pm$ 84                    | 484 $\pm$ 9                       | 144 $\pm$ 56                      | 6.839 $\pm$ 3.269                 | 3.146429 $\pm$ 0.024533                         | 98.39                | 93.98 $\pm$ 0.71    |                    | 118.76 | YES         |
| NAH8422              | 15               | 3166 $\pm$ 48                     | 214 $\pm$ 8                       | 4 $\pm$ 4                         | 12 $\pm$ 51                       | 8.170 $\pm$ 3.069                 | 3.396951 $\pm$ 4.299474                         | 22.99                | 101.26 $\pm$ 124.69 |                    | 7.91   | YES         |

Plateau age (8 of 9): 93.97  $\pm$  0.22 MSWD: 0.46

Inverse isochron age (8 of 9): 93.97  $\pm$  0.40

( $^{40}\text{Ar}/^{36}\text{Ar}$ )<sub>trapped</sub> intercept: 326  $\pm$  160

Integrated age (9 of 9): 94.28  $\pm$  0.26



| Sample:<br>Material: | NC-C<br>sanidine |                                   |                                   |                                   |                                   |                                   |                                                 |                      |                   |                    |        | Included in |
|----------------------|------------------|-----------------------------------|-----------------------------------|-----------------------------------|-----------------------------------|-----------------------------------|-------------------------------------------------|----------------------|-------------------|--------------------|--------|-------------|
|                      | Laser            | $^{40}\text{Ar} \pm 2\sigma_{40}$ | $^{39}\text{Ar} \pm 2\sigma_{39}$ | $^{38}\text{Ar} \pm 2\sigma_{38}$ | $^{37}\text{Ar} \pm 2\sigma_{37}$ | $^{36}\text{Ar} \pm 2\sigma_{36}$ |                                                 |                      |                   |                    |        |             |
| File                 | Power (%)        | (cps) (cps)                       | $^{40}\text{Ar}^*/^{39}\text{Ar}_K \pm 2\sigma$ | % $^{40}\text{Ar}^*$ | Age (Ma)          | $\pm 2\sigma$ (Ma) | K/Ca   | plateau     |
| NAH8488              | 0.33             | 27134 $\pm$ 98                    | 7596 $\pm$ 36                     | 88 $\pm$ 5                        | 41 $\pm$ 49                       | 5.480 $\pm$ 3.082                 | 3.356617 $\pm$ 0.121150                         | 93.97                | 100.09 $\pm$ 3.52 |                    | 78.71  |             |
| NAH8491              | 0.4              | 25669 $\pm$ 94                    | 7852 $\pm$ 32                     | 97 $\pm$ 4                        | 30 $\pm$ 54                       | 0.752 $\pm$ 3.011                 | 3.240254 $\pm$ 0.114505                         | 99.12                | 96.71 $\pm$ 3.33  |                    | 113.12 | YES         |
| NAH8493              | 0.44             | 48227 $\pm$ 142                   | 14967 $\pm$ 42                    | 179 $\pm$ 6                       | 61 $\pm$ 56                       | 2.929 $\pm$ 3.135                 | 3.163613 $\pm$ 0.062546                         | 98.18                | 94.48 $\pm$ 1.82  |                    | 104.76 | YES         |
| NAH8495              | 0.48             | 31748 $\pm$ 93                    | 9948 $\pm$ 36                     | 118 $\pm$ 5                       | 28 $\pm$ 50                       | 1.504 $\pm$ 2.740                 | 3.145855 $\pm$ 0.082248                         | 98.58                | 93.97 $\pm$ 2.39  |                    | 152.49 | YES         |
| NAH8497              | 0.52             | 51596 $\pm$ 138                   | 16287 $\pm$ 46                    | 198 $\pm$ 6                       | 46 $\pm$ 48                       | 2.649 $\pm$ 3.201                 | 3.119115 $\pm$ 0.058689                         | 98.46                | 93.19 $\pm$ 1.71  |                    | 153.11 | YES         |
| NAH8499              | 0.6              | 212941 $\pm$ 509                  | 67515 $\pm$ 168                   | 812 $\pm$ 15                      | 287 $\pm$ 70                      | 1.403 $\pm$ 3.956                 | 3.147574 $\pm$ 0.017529                         | 99.80                | 94.02 $\pm$ 0.51  |                    | 101.02 | YES         |
| NAH8501              | 0.85             | 347046 $\pm$ 782                  | 110022 $\pm$ 199                  | 1345 $\pm$ 16                     | 416 $\pm$ 64                      | 1.014 $\pm$ 3.599                 | 3.151368 $\pm$ 0.009809                         | 99.91                | 94.13 $\pm$ 0.29  |                    | 113.79 | YES         |
| NAH8503              | 2                | 291512 $\pm$ 648                  | 91836 $\pm$ 200                   | 1105 $\pm$ 15                     | 340 $\pm$ 63                      | 8.039 $\pm$ 4.462                 | 3.147884 $\pm$ 0.014539                         | 99.17                | 94.03 $\pm$ 0.42  |                    | 115.98 | YES         |
| NAH8506              | 15               | 47356 $\pm$ 132                   | 14173 $\pm$ 46                    | 166 $\pm$ 6                       | 64 $\pm$ 45                       | 8.570 $\pm$ 3.422                 | 3.160567 $\pm$ 0.072096                         | 94.59                | 94.40 $\pm$ 2.10  |                    | 95.36  | YES         |

Plateau age (8 of 9): **94.09 ± 0.21**      **MSWD: 0.59**  
 Inverse isochron age (8 of 9): **94.08 ± 0.65**  
 ( $^{40}\text{Ar}/^{36}\text{Ar}$ )<sub>trapped</sub> intercept: **315 ± 180**  
 Integrated age (9 of 9): **94.25 ± 0.26**

| Sample:<br>Material: | NC-C<br>sanidine |                                     |       |                                    |       |                                     |       |                                     |       |                                     |       | Included in                                           |                     |          |              |        |         |
|----------------------|------------------|-------------------------------------|-------|------------------------------------|-------|-------------------------------------|-------|-------------------------------------|-------|-------------------------------------|-------|-------------------------------------------------------|---------------------|----------|--------------|--------|---------|
|                      | Laser            | <sup>40</sup> Ar ± 2σ <sub>40</sub> |       | <sup>39</sup> Ar ±2σ <sub>39</sub> |       | <sup>38</sup> Ar ± 2σ <sub>38</sub> |       | <sup>37</sup> Ar ± 2σ <sub>37</sub> |       | <sup>36</sup> Ar ± 2σ <sub>36</sub> |       | <sup>40</sup> Ar*/ <sup>39</sup> Ar <sub>K</sub> ± 2σ | % <sup>40</sup> Ar* | Age (Ma) | ± 2σ (Ma)    | K/Ca   | plateau |
| File                 | Power (%)        | (cps)                               | (cps) | (cps)                              | (cps) | (cps)                               | (cps) | (cps)                               | (cps) | (cps)                               | (cps) |                                                       |                     |          |              |        |         |
| NAH8796              | 0.4              | 214977 ± 483                        |       | 66832 ± 128                        |       | 805 ± 10                            |       | 318 ± 46                            |       | 13.503 ± 3.595                      |       | 3.156215 ± 0.016087                                   |                     | 98.12    | 94.27 ± 0.47 | 90.42  | YES     |
| NAH8799              | 0.46             | 287161 ± 610                        |       | 90792 ± 133                        |       | 1091 ± 14                           |       | 348 ± 68                            |       | 5.828 ± 3.762                       |       | 3.143429 ± 0.012398                                   |                     | 99.39    | 93.90 ± 0.36 | 112.33 | YES     |
| NAH8801              | 0.52             | 184455 ± 422                        |       | 58401 ± 111                        |       | 706 ± 13                            |       | 249 ± 61                            |       | 2.395 ± 3.629                       |       | 3.145981 ± 0.018577                                   |                     | 99.61    | 93.97 ± 0.54 | 100.66 | YES     |
| NAH8803              | 0.6              | 70238 ± 204                         |       | 22167 ± 51                         |       | 264 ± 8                             |       | 92 ± 56                             |       | 0.885 ± 3.534                       |       | 3.156455 ± 0.047615                                   |                     | 99.62    | 94.28 ± 1.39 | 103.27 | YES     |
| NAH8805              | 0.8              | 114064 ± 277                        |       | 35355 ± 70                         |       | 437 ± 9                             |       | 153 ± 53                            |       | 10.507 ± 3.339                      |       | 3.137358 ± 0.028217                                   |                     | 97.24    | 93.72 ± 0.82 | 99.22  | YES     |
| NAH8807              | 1.5              | 63483 ± 181                         |       | 19834 ± 61                         |       | 239 ± 7                             |       | 71 ± 56                             |       | 3.893 ± 3.185                       |       | 3.141799 ± 0.047960                                   |                     | 98.16    | 93.85 ± 1.40 | 120.63 | YES     |
| NAH8809              | 5                | 137651 ± 343                        |       | 43491 ± 90                         |       | 517 ± 11                            |       | 174 ± 68                            |       | 1.184 ± 3.319                       |       | 3.156659 ± 0.022808                                   |                     | 99.74    | 94.28 ± 0.66 | 107.67 | YES     |

Plateau age (7 of 7): **94.03 ± 0.22**      **MSWD: 0.50**  
 Inverse isochron age (7 of 7): **94.03 ± 0.82**  
 ( $^{40}\text{Ar}/^{36}\text{Ar}$ )<sub>trapped</sub> intercept: **305 ± 160**  
 Integrated age (7 of 7): **94.04 ± 0.24**

| Sample:<br>Material: | NC-D<br>sanidine |                                     |       |                                     |       |                                     |       |                                     |       |                                     |       | Included in                                           |                     |                    |        |     |
|----------------------|------------------|-------------------------------------|-------|-------------------------------------|-------|-------------------------------------|-------|-------------------------------------|-------|-------------------------------------|-------|-------------------------------------------------------|---------------------|--------------------|--------|-----|
|                      | Laser            | <sup>40</sup> Ar ± 2σ <sub>40</sub> |       | <sup>39</sup> Ar ± 2σ <sub>39</sub> |       | <sup>38</sup> Ar ± 2σ <sub>38</sub> |       | <sup>37</sup> Ar ± 2σ <sub>37</sub> |       | <sup>36</sup> Ar ± 2σ <sub>36</sub> |       | <sup>40</sup> Ar*/ <sup>39</sup> Ar <sub>K</sub> ± 2σ | % <sup>40</sup> Ar* | Age (Ma) ± 2σ (Ma) | K/Ca   |     |
| File                 | Power (%)        | (cps)                               | (cps) |                                                       |                     |                    |        |     |
| NAH8521              | 0.33             | 15806 ± 82                          |       | 3828 ± 26                           |       | 43 ± 4                              |       | 33 ± 63                             |       | 11.142 ± 3.425                      |       | 3.259942 ± 0.267191                                   | 78.96               | 97.29 ± 7.77       | 49.52  |     |
| NAH8524              | 0.40             | 15696 ± 73                          |       | 4392 ± 23                           |       | 57 ± 5                              |       | 26 ± 55                             |       | 9.578 ± 3.424                       |       | 2.922918 ± 0.232816                                   | 81.78               | 87.46 ± 6.80       | 73.84  |     |
| NAH8526              | 0.45             | 60681 ± 163                         |       | 18292 ± 48                          |       | 221 ± 5                             |       | 76 ± 60                             |       | 15.547 ± 3.366                      |       | 3.063436 ± 0.054959                                   | 92.34               | 91.57 ± 1.60       | 103.97 |     |
| NAH8528              | 0.50             | 181815 ± 430                        |       | 58224 ± 83                          |       | 710 ± 11                            |       | 265 ± 62                            |       | 4.953 ± 3.057                       |       | 3.097124 ± 0.015703                                   | 99.18               | 92.55 ± 0.46       | 94.47  |     |
| NAH8530              | 0.58             | 112618 ± 274                        |       | 35927 ± 68                          |       | 433 ± 10                            |       | 125 ± 61                            |       | 1.595 ± 4.205                       |       | 3.121146 ± 0.034955                                   | 99.57               | 93.25 ± 1.02       | 123.11 | YES |
| NAH8532              | 0.8              | 230096 ± 544                        |       | 73291 ± 183                         |       | 893 ± 12                            |       | 298 ± 70                            |       | 1.561 ± 3.713                       |       | 3.132938 ± 0.015167                                   | 99.79               | 93.59 ± 0.44       | 105.61 | YES |
| NAH8534              | 2                | 150313 ± 374                        |       | 47766 ± 112                         |       | 590 ± 11                            |       | 178 ± 56                            |       | 1.466 ± 3.606                       |       | 3.137463 ± 0.022567                                   | 99.70               | 93.72 ± 0.66       | 115.38 | YES |
| NAH8537              | 13               | 54878 ± 153                         |       | 16240 ± 46                          |       | 196 ± 6                             |       | 67 ± 66                             |       | 12.809 ± 3.144                      |       | 3.143602 ± 0.057817                                   | 93.03               | 93.90 ± 1.68       | 103.70 | YES |
| NAH8540              | 20               | 3970 ± 51                           |       | 318 ± 10                            |       | 6 ± 3                               |       | 18 ± 63                             |       | 8.706 ± 3.188                       |       | 4.310259 ± 2.999697                                   | 34.56               | 127.56 ± 85.75     | 7.81   | YES |

Plateau age (8 of 9): **93.60 ± 0.34**      **MSWD: 0.34**  
 Inverse isochron age (8 of 9): **93.57 ± 0.70**  
 ( $^{40}\text{Ar}/^{36}\text{Ar}$ )<sub>trapped</sub> intercept: **325 ± 100**  
 Integrated age (9 of 9): **93.20 ± 0.35**

| Sample:<br>Material: | NC-D<br>sanidine |                                   |                                   |                                   |                                   |                                   |                                                 |                      |                     |                    |        |             |
|----------------------|------------------|-----------------------------------|-----------------------------------|-----------------------------------|-----------------------------------|-----------------------------------|-------------------------------------------------|----------------------|---------------------|--------------------|--------|-------------|
|                      | Laser            | $^{40}\text{Ar} \pm 2\sigma_{40}$ | $^{39}\text{Ar} \pm 2\sigma_{39}$ | $^{38}\text{Ar} \pm 2\sigma_{38}$ | $^{37}\text{Ar} \pm 2\sigma_{37}$ | $^{36}\text{Ar} \pm 2\sigma_{36}$ |                                                 |                      |                     |                    |        | Included in |
| File                 | Power (%)        | (cps) (cps)                       | $^{40}\text{Ar}^*/^{39}\text{Ar}_K \pm 2\sigma$ | % $^{40}\text{Ar}^*$ | Age (Ma)            | $\pm 2\sigma$ (Ma) | K/Ca   | plateau     |
| NAH8543              | 0.33             | 24815 $\pm$ 94                    | 6063 $\pm$ 28                     | 72 $\pm$ 4                        | 5 $\pm$ 48                        | 11.455 $\pm$ 3.621                | 3.528353 $\pm$ 0.178332                         | 86.21                | 105.07 $\pm$ 5.16   |                    | 577.40 |             |
| NAH8546              | 0.4              | 59078 $\pm$ 159                   | 18451 $\pm$ 54                    | 223 $\pm$ 5                       | 64 $\pm$ 74                       | 2.572 $\pm$ 3.491                 | 3.160037 $\pm$ 0.056504                         | 98.69                | 94.38 $\pm$ 1.64    |                    | 123.24 | YES         |
| NAH8548              | 0.45             | 53821 $\pm$ 154                   | 17061 $\pm$ 45                    | 205 $\pm$ 5                       | 50 $\pm$ 46                       | 1.289 $\pm$ 3.135                 | 3.131718 $\pm$ 0.054872                         | 99.28                | 93.56 $\pm$ 1.60    |                    | 146.73 | YES         |
| NAH8550              | 0.5              | 114366 $\pm$ 297                  | 36339 $\pm$ 80                    | 444 $\pm$ 10                      | 110 $\pm$ 57                      | 2.206 $\pm$ 3.296                 | 3.128821 $\pm$ 0.027104                         | 99.41                | 93.47 $\pm$ 0.79    |                    | 141.46 | YES         |
| NAH8552              | 0.58             | 283321 $\pm$ 663                  | 89805 $\pm$ 154                   | 1085 $\pm$ 16                     | 410 $\pm$ 68                      | 5.643 $\pm$ 4.199                 | 3.135911 $\pm$ 0.013990                         | 99.40                | 93.68 $\pm$ 0.41    |                    | 94.19  | YES         |
| NAH8554              | 0.8              | 295993 $\pm$ 685                  | 93749 $\pm$ 162                   | 1131 $\pm$ 15                     | 359 $\pm$ 77                      | 3.201 $\pm$ 4.014                 | 3.146866 $\pm$ 0.012817                         | 99.67                | 94.00 $\pm$ 0.37    |                    | 112.37 | YES         |
| NAH8556              | 2                | 305270 $\pm$ 715                  | 96333 $\pm$ 122                   | 1154 $\pm$ 14                     | 391 $\pm$ 77                      | 6.497 $\pm$ 3.407                 | 3.148558 $\pm$ 0.010594                         | 99.36                | 94.05 $\pm$ 0.31    |                    | 105.86 | YES         |
| NAH8559              | 13               | 460752 $\pm$ 916                  | 144074 $\pm$ 207                  | 1745 $\pm$ 20                     | 566 $\pm$ 74                      | 13.585 $\pm$ 4.629                | 3.169649 $\pm$ 0.009624                         | 99.11                | 94.66 $\pm$ 0.28    |                    | 109.40 |             |
| NAH8562              | 20               | 1980 $\pm$ 50                     | 94 $\pm$ 7                        | 1 $\pm$ 3                         | 7 $\pm$ 41                        | 5.340 $\pm$ 3.073                 | 4.112994 $\pm$ 9.847965                         | 19.51                | 121.91 $\pm$ 282.39 |                    | 5.68   |             |

Plateau age (6 of 9): **93.91  $\pm$  0.20**  
 Inverse isochron age (6 of 9): **93.55  $\pm$  0.04**  
 $(^{40}\text{Ar}/^{36}\text{Ar})_{\text{trapped}}$  intercept: **527  $\pm$  1000**  
 Integrated age (9 of 9): **94.24  $\pm$  0.19**

| Sample:<br>Material: | NC-D<br>sanidine |                                   |                                   |                                   |                                   |                                   |                                                 |                      |                   |                    |        |             |
|----------------------|------------------|-----------------------------------|-----------------------------------|-----------------------------------|-----------------------------------|-----------------------------------|-------------------------------------------------|----------------------|-------------------|--------------------|--------|-------------|
|                      | Laser            | $^{40}\text{Ar} \pm 2\sigma_{40}$ | $^{39}\text{Ar} \pm 2\sigma_{39}$ | $^{38}\text{Ar} \pm 2\sigma_{38}$ | $^{37}\text{Ar} \pm 2\sigma_{37}$ | $^{36}\text{Ar} \pm 2\sigma_{36}$ |                                                 |                      |                   |                    |        | Included in |
| File                 | Power (%)        | (cps) (cps)                       | $^{40}\text{Ar}^*/^{39}\text{Ar}_K \pm 2\sigma$ | % $^{40}\text{Ar}^*$ | Age (Ma)          | $\pm 2\sigma$ (Ma) | K/Ca   | plateau     |
| NAH8565              | 0.33             | 33433 $\pm$ 103                   | 9249 $\pm$ 39                     | 105 $\pm$ 4                       | 36 $\pm$ 60                       | 10.659 $\pm$ 3.026                | 3.270510 $\pm$ 0.097703                         | 90.47                | 97.59 $\pm$ 2.84  |                    | 109.75 |             |
| NAH8568              | 0.4              | 55647 $\pm$ 147                   | 17375 $\pm$ 50                    | 213 $\pm$ 6                       | 55 $\pm$ 68                       | 0.116 $\pm$ 3.071                 | 3.200371 $\pm$ 0.052791                         | 99.93                | 95.55 $\pm$ 1.54  |                    | 135.44 |             |
| NAH8570              | 0.45             | 111698 $\pm$ 271                  | 35546 $\pm$ 66                    | 427 $\pm$ 8                       | 153 $\pm$ 64                      | 2.993 $\pm$ 3.218                 | 3.117012 $\pm$ 0.027045                         | 99.19                | 93.13 $\pm$ 0.79  |                    | 99.99  | YES         |
| NAH8572              | 0.5              | 108950 $\pm$ 263                  | 35008 $\pm$ 72                    | 423 $\pm$ 8                       | 141 $\pm$ 68                      | 0.061 $\pm$ 3.137                 | 3.111382 $\pm$ 0.026769                         | 99.98                | 92.96 $\pm$ 0.78  |                    | 106.99 | YES         |
| NAH8574              | 0.58             | 75549 $\pm$ 194                   | 24205 $\pm$ 56                    | 294 $\pm$ 7                       | 106 $\pm$ 40                      | 0.928 $\pm$ 3.085                 | 3.109596 $\pm$ 0.038065                         | 99.63                | 92.91 $\pm$ 1.11  |                    | 97.76  | YES         |
| NAH8576              | 0.8              | 276475 $\pm$ 625                  | 88163 $\pm$ 129                   | 1075 $\pm$ 12                     | 337 $\pm$ 83                      | 0.340 $\pm$ 3.272                 | 3.134588 $\pm$ 0.011114                         | 99.96                | 93.64 $\pm$ 0.32  |                    | 112.64 | YES         |
| NAH8578              | 2                | 285052 $\pm$ 654                  | 90710 $\pm$ 130                   | 1109 $\pm$ 15                     | 351 $\pm$ 56                      | 4.112 $\pm$ 3.383                 | 3.128700 $\pm$ 0.011167                         | 99.56                | 93.47 $\pm$ 0.33  |                    | 111.19 | YES         |
| NAH8581              | 9                | 109019 $\pm$ 278                  | 33965 $\pm$ 72                    | 404 $\pm$ 7                       | 149 $\pm$ 52                      | 7.375 $\pm$ 3.049                 | 3.144698 $\pm$ 0.026825                         | 97.97                | 93.93 $\pm$ 0.78  |                    | 97.72  | YES         |
| NAH8584              | 16               | 13424 $\pm$ 67                    | 2861 $\pm$ 23                     | 35 $\pm$ 4                        | 9 $\pm$ 67                        | 13.812 $\pm$ 3.370                | 3.250377 $\pm$ 0.351903                         | 69.28                | 97.01 $\pm$ 10.23 |                    | 134.81 | YES         |

Plateau age (7 of 9): **93.49  $\pm$  0.20**  
 Inverse isochron age (7 of 9): **93.46  $\pm$  0.48**  
 $(^{40}\text{Ar}/^{36}\text{Ar})_{\text{trapped}}$  intercept: **332  $\pm$  100**  
 Integrated age (9 of 9): **93.68  $\pm$  0.25**

| Sample:<br>Material: | NC-D<br>sanidine |                                   |                                   |                                   |                                   |                                   |                                                 |                      |                   |                    |        |             |
|----------------------|------------------|-----------------------------------|-----------------------------------|-----------------------------------|-----------------------------------|-----------------------------------|-------------------------------------------------|----------------------|-------------------|--------------------|--------|-------------|
|                      | Laser            | $^{40}\text{Ar} \pm 2\sigma_{40}$ | $^{39}\text{Ar} \pm 2\sigma_{39}$ | $^{38}\text{Ar} \pm 2\sigma_{38}$ | $^{37}\text{Ar} \pm 2\sigma_{37}$ | $^{36}\text{Ar} \pm 2\sigma_{36}$ |                                                 |                      |                   |                    |        | Included in |
| File                 | Power (%)        | (cps) (cps)                       | $^{40}\text{Ar}^*/^{39}\text{Ar}_K \pm 2\sigma$ | % $^{40}\text{Ar}^*$ | Age (Ma)          | $\pm 2\sigma$ (Ma) | K/Ca   | plateau     |
| NAH8587              | 0.33             | 26414 $\pm$ 91                    | 7478 $\pm$ 32                     | 87 $\pm$ 5                        | 60 $\pm$ 65                       | 6.185 $\pm$ 2.966                 | 3.285216 $\pm$ 0.118426                         | 93.01                | 98.02 $\pm$ 3.44  |                    | 53.51  |             |
| NAH8590              | 0.4              | 42983 $\pm$ 123                   | 13546 $\pm$ 39                    | 168 $\pm$ 5                       | 57 $\pm$ 56                       | 2.350 $\pm$ 2.960                 | 3.121057 $\pm$ 0.065262                         | 98.36                | 93.25 $\pm$ 1.90  |                    | 102.03 | YES         |
| NAH8592              | 0.45             | 83449 $\pm$ 214                   | 26762 $\pm$ 63                    | 323 $\pm$ 7                       | 58 $\pm$ 57                       | 0.722 $\pm$ 2.851                 | 3.109833 $\pm$ 0.031830                         | 99.73                | 92.92 $\pm$ 0.93  |                    | 197.01 | YES         |
| NAH8594              | 0.5              | 182119 $\pm$ 451                  | 58208 $\pm$ 98                    | 720 $\pm$ 12                      | 178 $\pm$ 46                      | 2.298 $\pm$ 3.248                 | 3.116712 $\pm$ 0.016689                         | 99.61                | 93.12 $\pm$ 0.49  |                    | 140.30 | YES         |
| NAH8596              | 0.58             | 164927 $\pm$ 375                  | 52823 $\pm$ 99                    | 638 $\pm$ 12                      | 159 $\pm$ 55                      | 0.266 $\pm$ 3.217                 | 3.120437 $\pm$ 0.018208                         | 99.94                | 93.23 $\pm$ 0.53  |                    | 142.94 | YES         |
| NAH8598              | 0.8              | 244540 $\pm$ 558                  | 77977 $\pm$ 133                   | 959 $\pm$ 13                      | 231 $\pm$ 68                      | 1.151 $\pm$ 3.458                 | 3.131367 $\pm$ 0.013270                         | 99.85                | 93.55 $\pm$ 0.39  |                    | 145.18 | YES         |
| NAH8600              | 2                | 78031 $\pm$ 193                   | 24662 $\pm$ 57                    | 289 $\pm$ 7                       | 92 $\pm$ 49                       | 2.389 $\pm$ 2.982                 | 3.134768 $\pm$ 0.036117                         | 99.08                | 93.64 $\pm$ 1.05  |                    | 115.12 | YES         |
| NAH8603              | 9                | 29310 $\pm$ 94                    | 8403 $\pm$ 33                     | 103 $\pm$ 4                       | 54 $\pm$ 80                       | 10.907 $\pm$ 2.908                | 3.100367 $\pm$ 0.103336                         | 88.89                | 92.64 $\pm$ 3.01  |                    | 67.37  | YES         |
| NAH8606              | 16               | 5224 $\pm$ 48                     | 359 $\pm$ 8                       | 7 $\pm$ 4                         | 4 $\pm$ 71                        | 14.404 $\pm$ 3.350                | 2.568495 $\pm$ 2.796414                         | 17.67                | 77.08 $\pm$ 82.18 |                    | 41.37  | YES         |

Plateau age (8 of 9): **93.32  $\pm$  0.25**  
 Inverse isochron age (8 of 9): **93.35  $\pm$  0.47**  
 $(^{40}\text{Ar}/^{36}\text{Ar})_{\text{trapped}}$  intercept: **285  $\pm$  79**  
 Integrated age (9 of 9): **93.40  $\pm$  0.30**



| Sample:<br>Material: | NC-D<br>sanidine |                                   |                                   |                                   |                                   |                                   |                                                 |                      |                   |                    |        |     |             |
|----------------------|------------------|-----------------------------------|-----------------------------------|-----------------------------------|-----------------------------------|-----------------------------------|-------------------------------------------------|----------------------|-------------------|--------------------|--------|-----|-------------|
|                      | Laser            | $^{40}\text{Ar} \pm 2\sigma_{40}$ | $^{39}\text{Ar} \pm 2\sigma_{39}$ | $^{38}\text{Ar} \pm 2\sigma_{38}$ | $^{37}\text{Ar} \pm 2\sigma_{37}$ | $^{36}\text{Ar} \pm 2\sigma_{36}$ |                                                 |                      |                   |                    |        |     | Included in |
| File                 | Power (%)        | (cps) (cps)                       | $^{40}\text{Ar}^*/^{39}\text{Ar}_K \pm 2\sigma$ | % $^{40}\text{Ar}^*$ | Age (Ma)          | $\pm 2\sigma$ (Ma) | K/Ca   |     | plateau     |
| NAH8609              | 0.35             | 59028 $\pm$ 162                   | 17527 $\pm$ 47                    | 211 $\pm$ 6                       | 89 $\pm$ 75                       | 8.588 $\pm$ 2.788                 | 3.221358 $\pm$ 0.047513                         | 95.65                | 96.16 $\pm$ 1.38  |                    | 85.09  |     |             |
| NAH8612              | 0.42             | 181061 $\pm$ 406                  | 57367 $\pm$ 82                    | 693 $\pm$ 9                       | 256 $\pm$ 67                      | 5.823 $\pm$ 3.072                 | 3.125699 $\pm$ 0.016009                         | 99.03                | 93.38 $\pm$ 0.47  |                    | 96.25  | YES |             |
| NAH8614              | 0.47             | 237393 $\pm$ 535                  | 75775 $\pm$ 146                   | 924 $\pm$ 15                      | 331 $\pm$ 47                      | 4.426 $\pm$ 3.469                 | 3.115260 $\pm$ 0.013699                         | 99.44                | 93.08 $\pm$ 0.40  |                    | 98.57  | YES |             |
| NAH8616              | 0.52             | 237617 $\pm$ 525                  | 75851 $\pm$ 110                   | 929 $\pm$ 10                      | 322 $\pm$ 60                      | 1.705 $\pm$ 2.833                 | 3.125765 $\pm$ 0.011184                         | 99.78                | 93.38 $\pm$ 0.33  |                    | 101.19 | YES |             |
| NAH8618              | 0.6              | 193954 $\pm$ 435                  | 61999 $\pm$ 94                    | 752 $\pm$ 12                      | 291 $\pm$ 68                      | 0.296 $\pm$ 3.286                 | 3.126729 $\pm$ 0.015846                         | 99.95                | 93.41 $\pm$ 0.46  |                    | 91.60  | YES |             |
| NAH8620              | 0.8              | 272656 $\pm$ 600                  | 86904 $\pm$ 112                   | 1052 $\pm$ 13                     | 388 $\pm$ 53                      | 1.015 $\pm$ 3.201                 | 3.133760 $\pm$ 0.011027                         | 99.88                | 93.62 $\pm$ 0.32  |                    | 96.38  | YES |             |
| NAH8622              | 2                | 53253 $\pm$ 158                   | 16672 $\pm$ 44                    | 198 $\pm$ 6                       | 86 $\pm$ 70                       | 2.237 $\pm$ 2.860                 | 3.153901 $\pm$ 0.051224                         | 98.74                | 94.20 $\pm$ 1.49  |                    | 83.67  | YES |             |
| NAH8624              | 9                | 24224 $\pm$ 83                    | 4683 $\pm$ 29                     | 61 $\pm$ 4                        | 7 $\pm$ 46                        | 16.679 $\pm$ 3.336                | 4.109347 $\pm$ 0.212813                         | 79.44                | 121.81 $\pm$ 6.10 |                    | 269.07 |     |             |

Plateau age (6 of 8): 93.41  $\pm$  0.17 MSWD: 1.12  
 Inverse isochron age (6 of 8): 93.40  $\pm$  2.10  
 ( $^{40}\text{Ar}/^{36}\text{Ar}$ )<sub>trapped</sub> intercept: 288  $\pm$  310  
 Integrated age (8 of 8): 93.87  $\pm$  0.19

| Sample:<br>Material: | NC-D<br>sanidine |                                   |                                   |                                   |                                   |                                   |                                                 |                      |                    |                    |        |     |             |
|----------------------|------------------|-----------------------------------|-----------------------------------|-----------------------------------|-----------------------------------|-----------------------------------|-------------------------------------------------|----------------------|--------------------|--------------------|--------|-----|-------------|
|                      | Laser            | $^{40}\text{Ar} \pm 2\sigma_{40}$ | $^{39}\text{Ar} \pm 2\sigma_{39}$ | $^{38}\text{Ar} \pm 2\sigma_{38}$ | $^{37}\text{Ar} \pm 2\sigma_{37}$ | $^{36}\text{Ar} \pm 2\sigma_{36}$ |                                                 |                      |                    |                    |        |     | Included in |
| File                 | Power (%)        | (cps) (cps)                       | $^{40}\text{Ar}^*/^{39}\text{Ar}_K \pm 2\sigma$ | % $^{40}\text{Ar}^*$ | Age (Ma)           | $\pm 2\sigma$ (Ma) | K/Ca   |     | plateau     |
| NAH8630              | 0.35             | 92746 $\pm$ 214                   | 27313 $\pm$ 65                    | 332 $\pm$ 7                       | 97 $\pm$ 56                       | 20.851 $\pm$ 3.305                | 3.167531 $\pm$ 0.036149                         | 93.28                | 94.60 $\pm$ 1.05   |                    | 121.28 |     |             |
| NAH8633              | 0.42             | 172908 $\pm$ 353                  | 54794 $\pm$ 76                    | 670 $\pm$ 8                       | 248 $\pm$ 72                      | 6.590 $\pm$ 2.823                 | 3.119518 $\pm$ 0.015404                         | 98.86                | 93.20 $\pm$ 0.45   |                    | 94.88  | YES |             |
| NAH8635              | 0.47             | 153130 $\pm$ 330                  | 48879 $\pm$ 86                    | 595 $\pm$ 9                       | 229 $\pm$ 52                      | 2.889 $\pm$ 3.061                 | 3.115036 $\pm$ 0.018716                         | 99.43                | 93.07 $\pm$ 0.55   |                    | 91.87  | YES |             |
| NAH8637              | 0.52             | 135693 $\pm$ 291                  | 43395 $\pm$ 75                    | 518 $\pm$ 8                       | 210 $\pm$ 54                      | 0.410 $\pm$ 2.966                 | 3.123982 $\pm$ 0.020424                         | 99.90                | 93.33 $\pm$ 0.59   |                    | 89.01  | YES |             |
| NAH8639              | 0.6              | 181609 $\pm$ 436                  | 57551 $\pm$ 139                   | 702 $\pm$ 11                      | 253 $\pm$ 71                      | 2.600 $\pm$ 4.119                 | 3.141941 $\pm$ 0.021394                         | 99.57                | 93.85 $\pm$ 0.62   |                    | 97.71  | YES |             |
| NAH8641              | 0.8              | 116631 $\pm$ 258                  | 37178 $\pm$ 79                    | 450 $\pm$ 7                       | 171 $\pm$ 59                      | 2.448 $\pm$ 2.832                 | 3.117237 $\pm$ 0.022766                         | 99.37                | 93.13 $\pm$ 0.66   |                    | 93.52  | YES |             |
| NAH8643              | 2                | 178494 $\pm$ 391                  | 56735 $\pm$ 82                    | 679 $\pm$ 9                       | 250 $\pm$ 42                      | 3.988 $\pm$ 2.992                 | 3.124926 $\pm$ 0.015766                         | 99.33                | 93.36 $\pm$ 0.46   |                    | 97.44  | YES |             |
| NAH8645              | 9                | 131014 $\pm$ 308                  | 41375 $\pm$ 73                    | 499 $\pm$ 10                      | 203 $\pm$ 49                      | 6.730 $\pm$ 3.110                 | 3.117802 $\pm$ 0.022462                         | 98.46                | 93.15 $\pm$ 0.65   |                    | 87.71  | YES |             |
| NAH8648              | 16               | 1282 $\pm$ 47                     | 93 $\pm$ 8                        | 3 $\pm$ 5                         | 4 $\pm$ 43                        | 3.720 $\pm$ 2.917                 | 1.843102 $\pm$ 9.408837                         | 13.39                | 55.64 $\pm$ 279.75 |                    | 9.80   | YES |             |

Plateau age (8 of 9): 93.29  $\pm$  0.21 MSWD: 0.67  
 Inverse isochron age (8 of 9): 93.40  $\pm$  1.50  
 ( $^{40}\text{Ar}/^{36}\text{Ar}$ )<sub>trapped</sub> intercept: 261  $\pm$  210  
 Integrated age (9 of 9): 93.41  $\pm$  0.22

| Sample:<br>Material: | NC-D<br>sanidine |                                   |                                   |                                   |                                   |                                   |                                                 |                      |                     |                    |        |     |             |
|----------------------|------------------|-----------------------------------|-----------------------------------|-----------------------------------|-----------------------------------|-----------------------------------|-------------------------------------------------|----------------------|---------------------|--------------------|--------|-----|-------------|
|                      | Laser            | $^{40}\text{Ar} \pm 2\sigma_{40}$ | $^{39}\text{Ar} \pm 2\sigma_{39}$ | $^{38}\text{Ar} \pm 2\sigma_{38}$ | $^{37}\text{Ar} \pm 2\sigma_{37}$ | $^{36}\text{Ar} \pm 2\sigma_{36}$ |                                                 |                      |                     |                    |        |     | Included in |
| File                 | Power (%)        | (cps) (cps)                       | $^{40}\text{Ar}^*/^{39}\text{Ar}_K \pm 2\sigma$ | % $^{40}\text{Ar}^*$ | Age (Ma)            | $\pm 2\sigma$ (Ma) | K/Ca   |     | plateau     |
| NAH8651              | 0.35             | 97930 $\pm$ 234                   | 30274 $\pm$ 73                    | 358 $\pm$ 7                       | 128 $\pm$ 49                      | 7.487 $\pm$ 3.046                 | 3.160769 $\pm$ 0.030057                         | 97.71                | 94.40 $\pm$ 0.87    |                    | 101.64 |     |             |
| NAH8654              | 0.42             | 149426 $\pm$ 358                  | 47405 $\pm$ 75                    | 570 $\pm$ 8                       | 239 $\pm$ 68                      | 5.913 $\pm$ 2.959                 | 3.114713 $\pm$ 0.018660                         | 98.81                | 93.06 $\pm$ 0.54    |                    | 85.26  | YES |             |
| NAH8656              | 0.47             | 152527 $\pm$ 342                  | 48606 $\pm$ 76                    | 597 $\pm$ 8                       | 240 $\pm$ 51                      | 3.790 $\pm$ 2.659                 | 3.114645 $\pm$ 0.016356                         | 99.25                | 93.06 $\pm$ 0.48    |                    | 87.22  | YES |             |
| NAH8658              | 0.52             | 151932 $\pm$ 336                  | 48457 $\pm$ 74                    | 588 $\pm$ 9                       | 238 $\pm$ 51                      | 2.868 $\pm$ 2.955                 | 3.117571 $\pm$ 0.018230                         | 99.43                | 93.14 $\pm$ 0.53    |                    | 87.61  | YES |             |
| NAH8660              | 0.6              | 99147 $\pm$ 226                   | 31532 $\pm$ 62                    | 381 $\pm$ 8                       | 139 $\pm$ 42                      | 1.492 $\pm$ 2.666                 | 3.130048 $\pm$ 0.025258                         | 99.54                | 93.51 $\pm$ 0.74    |                    | 97.69  | YES |             |
| NAH8662              | 0.8              | 71958 $\pm$ 175                   | 22983 $\pm$ 55                    | 283 $\pm$ 7                       | 90 $\pm$ 45                       | 1.608 $\pm$ 3.135                 | 3.109766 $\pm$ 0.040745                         | 99.33                | 92.92 $\pm$ 1.19    |                    | 109.99 | YES |             |
| NAH8664              | 2                | 88890 $\pm$ 199                   | 28265 $\pm$ 59                    | 343 $\pm$ 7                       | 127 $\pm$ 54                      | 2.657 $\pm$ 2.911                 | 3.116670 $\pm$ 0.030763                         | 99.10                | 93.12 $\pm$ 0.90    |                    | 96.03  | YES |             |
| NAH8667              | 9                | 114285 $\pm$ 269                  | 35742 $\pm$ 69                    | 437 $\pm$ 8                       | 172 $\pm$ 64                      | 6.766 $\pm$ 3.020                 | 3.140819 $\pm$ 0.025243                         | 98.23                | 93.82 $\pm$ 0.74    |                    | 89.17  | YES |             |
| NAH8670              | 16               | 1136 $\pm$ 49                     | 39 $\pm$ 7                        | 1 $\pm$ 4                         | 3 $\pm$ 55                        | 3.257 $\pm$ 2.809                 | 4.178970 $\pm$ 21.83716                         | 14.44                | 123.80 $\pm$ 625.54 |                    | 6.41   | YES |             |

Plateau age (8 of 9): 93.21  $\pm$  0.25 MSWD: 0.64  
 Inverse isochron age (8 of 9): 92.90  $\pm$  2.90  
 ( $^{40}\text{Ar}/^{36}\text{Ar}$ )<sub>trapped</sub> intercept: 405  $\pm$  330  
 Integrated age (9 of 9): 93.35  $\pm$  0.26

| Sample:<br>Material: | NC-D<br>sanidine |                                     |       |                                     |       |                                     |       |                                     |       |                                     |       |                                                       | Included in         |                  |           |        |         |
|----------------------|------------------|-------------------------------------|-------|-------------------------------------|-------|-------------------------------------|-------|-------------------------------------|-------|-------------------------------------|-------|-------------------------------------------------------|---------------------|------------------|-----------|--------|---------|
|                      | Laser            | <sup>40</sup> Ar ± 2σ <sub>40</sub> |       | <sup>39</sup> Ar ± 2σ <sub>39</sub> |       | <sup>38</sup> Ar ± 2σ <sub>38</sub> |       | <sup>37</sup> Ar ± 2σ <sub>37</sub> |       | <sup>36</sup> Ar ± 2σ <sub>36</sub> |       | <sup>40</sup> Ar*/ <sup>39</sup> Ar <sub>K</sub> ± 2σ | % <sup>40</sup> Ar* | Age (Ma)         | ± 2σ (Ma) | K/Ca   | plateau |
| File                 | Power (%)        | (cps)                               | (cps) |                                                       |                     |                  |           |        |         |
| NAH8673              | 0.35             | 58838 ± 179                         |       | 17979 ± 51                          |       | 217 ± 7                             |       | 84 ± 65                             |       | 7.663 ± 3.257                       |       | 3.145111 ± 0.054108                                   | 96.11               | 93.95 ± 1.58     |           | 91.94  | YES     |
| NAH8676              | 0.42             | 128021 ± 313                        |       | 36165 ± 72                          |       | 449 ± 8                             |       | 256 ± 60                            |       | 49.787 ± 4.061                      |       | 3.128958 ± 0.033550                                   | 88.39               | 93.48 ± 0.98     |           | 60.80  | YES     |
| NAH8678              | 0.47             | 262270 ± 639                        |       | 83798 ± 134                         |       | 1016 ± 13                           |       | 487 ± 72                            |       | 0.352 ± 3.048                       |       | 3.128465 ± 0.010899                                   | 99.96               | 93.46 ± 0.32     |           | 73.93  | YES     |
| NAH8680              | 0.52             | 153674 ± 383                        |       | 48871 ± 85                          |       | 594 ± 9                             |       | 300 ± 49                            |       | 2.534 ± 3.191                       |       | 3.128993 ± 0.019516                                   | 99.51               | 93.48 ± 0.57     |           | 70.04  | YES     |
| NAH8682              | 0.6              | 70144 ± 192                         |       | 22348 ± 52                          |       | 266 ± 6                             |       | 116 ± 60                            |       | 1.574 ± 2.701                       |       | 3.117511 ± 0.036106                                   | 99.33               | 93.14 ± 1.05     |           | 83.08  | YES     |
| NAH8684              | 0.8              | 68456 ± 183                         |       | 21634 ± 58                          |       | 263 ± 6                             |       | 184 ± 55                            |       | 2.120 ± 2.951                       |       | 3.135218 ± 0.040744                                   | 99.08               | 93.66 ± 1.19     |           | 50.68  | YES     |
| NAH8686              | 2                | 41667 ± 130                         |       | 13174 ± 38                          |       | 156 ± 7                             |       | 40 ± 45                             |       | 2.767 ± 3.074                       |       | 3.099753 ± 0.069682                                   | 98.01               | 92.62 ± 2.03     |           | 140.92 | YES     |
| NAH8689              | 9                | 64815 ± 203                         |       | 20060 ± 72                          |       | 237 ± 7                             |       | 103 ± 62                            |       | 0.314 ± 4.020                       |       | 3.226283 ± 0.059854                                   | 99.85               | 96.31 ± 1.74     |           | 83.40  |         |
| NAH8692              | 16               | 1607 ± 48                           |       | 104 ± 8                             |       | 3 ± 3                               |       | 6 ± 66                              |       | 6.540 ± 3.127                       |       | -3.300017 ± 9.04156                                   | -21.44              | -104.05 ± 293.34 |           | 7.73   |         |

Plateau age (7 of 9): **93.46  $\pm$  0.25**  
 Inverse isochron age (7 of 9): **93.47  $\pm$  0.49**  
 $(^{40}\text{Ar}/^{36}\text{Ar})_{\text{trapped}}$  intercept: **300  $\pm$  41**  
 Integrated age (9 of 9): **93.58  $\pm$  0.33**

| Sample:<br>Material: | NC-D<br>sanidine   |                                                    |                                                    |                                                    |                                                    |                                                    |                                                       |                     |              |           |       | Included in |
|----------------------|--------------------|----------------------------------------------------|----------------------------------------------------|----------------------------------------------------|----------------------------------------------------|----------------------------------------------------|-------------------------------------------------------|---------------------|--------------|-----------|-------|-------------|
| File                 | Laser<br>Power (%) | <sup>40</sup> Ar ± 2σ <sub>40</sub><br>(cps) (cps) | <sup>39</sup> Ar ± 2σ <sub>39</sub><br>(cps) (cps) | <sup>38</sup> Ar ± 2σ <sub>38</sub><br>(cps) (cps) | <sup>37</sup> Ar ± 2σ <sub>37</sub><br>(cps) (cps) | <sup>36</sup> Ar ± 2σ <sub>36</sub><br>(cps) (cps) | <sup>40</sup> Ar*/ <sup>39</sup> Ar <sub>K</sub> ± 2σ | % <sup>40</sup> Ar* | Age (Ma)     | ± 2σ (Ma) | K/Ca  | plateau     |
| NAH8695              | 0.35               | 142452 ± 353                                       | 44096 ± 85                                         | 524 ± 8                                            | 248 ± 63                                           | 7.964 ± 3.123                                      | 3.176499 ± 0.021170                                   | 98.33               | 94.86 ± 0.62 |           | 76.47 |             |
| NAH8698              | 0.42               | 303030 ± 690                                       | 95918 ± 96                                         | 1164 ± 11                                          | 514 ± 66                                           | 6.726 ± 3.063                                      | 3.138204 ± 0.009568                                   | 99.33               | 93.74 ± 0.28 |           | 80.32 | YES         |
| NAH8700              | 0.47               | 409280 ± 902                                       | 130051 ± 138                                       | 1579 ± 14                                          | 687 ± 95                                           | 8.023 ± 3.140                                      | 3.128544 ± 0.007251                                   | 99.41               | 93.46 ± 0.21 |           | 81.45 | YES         |
| NAH8702              | 0.52               | 111595 ± 275                                       | 35364 ± 67                                         | 425 ± 9                                            | 164 ± 63                                           | 2.764 ± 2.880                                      | 3.132142 ± 0.024332                                   | 99.26               | 93.57 ± 0.71 |           | 92.94 | YES         |
| NAH8704              | 0.6                | 85012 ± 220                                        | 26991 ± 53                                         | 321 ± 7                                            | 120 ± 47                                           | 1.124 ± 2.907                                      | 3.137066 ± 0.032178                                   | 99.60               | 93.71 ± 0.94 |           | 96.33 | YES         |
| NAH8706              | 0.8                | 33008 ± 111                                        | 10298 ± 39                                         | 125 ± 5                                            | 55 ± 39                                            | 1.373 ± 3.133                                      | 3.165366 ± 0.090837                                   | 98.75               | 94.54 ± 2.64 |           | 80.10 | YES         |
| NAH8708              | 2                  | 24816 ± 81                                         | 7598 ± 35                                          | 91 ± 5                                             | 45 ± 74                                            | 2.975 ± 2.881                                      | 3.149337 ± 0.113227                                   | 96.42               | 94.07 ± 3.30 |           | 72.36 | YES         |
| NAH8711              | 9                  | 19737 ± 78                                         | 5783 ± 29                                          | 72 ± 4                                             | 63 ± 53                                            | 3.600 ± 3.101                                      | 3.227229 ± 0.160092                                   | 94.56               | 96.34 ± 4.66 |           | 39.42 | YES         |

Plateau age (7 of 8): **93.58  $\pm$  0.17**  
 Inverse isochron age (7 of 8): **93.30  $\pm$  8.30**  
 $(^{40}\text{Ar}/^{36}\text{Ar})_{\text{trapped}}$  intercept: **471  $\pm$  440**  
 Integrated age (8 of 8): **93.83  $\pm$  0.21**

| Sample:<br>Material: | NC-D<br>sanidine |                                   |                                   |                                   |                                   |                                   |                                                 |                      |                  |                    |             |         |
|----------------------|------------------|-----------------------------------|-----------------------------------|-----------------------------------|-----------------------------------|-----------------------------------|-------------------------------------------------|----------------------|------------------|--------------------|-------------|---------|
|                      | Laser            | $^{40}\text{Ar} \pm 2\sigma_{40}$ | $^{39}\text{Ar} \pm 2\sigma_{39}$ | $^{38}\text{Ar} \pm 2\sigma_{38}$ | $^{37}\text{Ar} \pm 2\sigma_{37}$ | $^{36}\text{Ar} \pm 2\sigma_{36}$ |                                                 |                      |                  |                    | Included in |         |
| File                 | Power (%)        | (cps) (cps)                       | $^{40}\text{Ar}^*/^{39}\text{Ar}_K \pm 2\sigma$ | % $^{40}\text{Ar}^*$ | Age (Ma)         | $\pm 2\sigma$ (Ma) | K/Ca        | plateau |
| NAH8714              | 0.35             | 66833 $\pm$ 171                   | 19938 $\pm$ 48                    | 236 $\pm$ 6                       | 96 $\pm$ 55                       | 8.504 $\pm$ 3.198                 | 3.224540 $\pm$ 0.047906                         | 96.20                | 96.26 $\pm$ 1.39 |                    | 89.09       |         |
| NAH8717              | 0.42             | 108219 $\pm$ 266                  | 34225 $\pm$ 76                    | 414 $\pm$ 8                       | 132 $\pm$ 72                      | 4.833 $\pm$ 3.194                 | 3.119616 $\pm$ 0.027879                         | 98.66                | 93.20 $\pm$ 0.81 |                    | 111.63      | YES     |
| NAH8719              | 0.47             | 145956 $\pm$ 344                  | 46596 $\pm$ 82                    | 559 $\pm$ 9                       | 214 $\pm$ 57                      | 1.858 $\pm$ 2.759                 | 3.120321 $\pm$ 0.017701                         | 99.61                | 93.22 $\pm$ 0.52 |                    | 93.41       | YES     |
| NAH8721              | 0.52             | 317038 $\pm$ 732                  | 100886 $\pm$ 180                  | 1230 $\pm$ 16                     | 414 $\pm$ 58                      | 3.738 $\pm$ 3.534                 | 3.131281 $\pm$ 0.010498                         | 99.64                | 93.54 $\pm$ 0.31 |                    | 104.79      | YES     |
| NAH8723              | 0.6              | 241762 $\pm$ 548                  | 77339 $\pm$ 117                   | 933 $\pm$ 12                      | 354 $\pm$ 54                      | 0.787 $\pm$ 2.775                 | 3.122784 $\pm$ 0.010749                         | 99.90                | 93.30 $\pm$ 0.31 |                    | 93.94       | YES     |
| NAH8725              | 0.8              | 282616 $\pm$ 664                  | 89882 $\pm$ 166                   | 1074 $\pm$ 16                     | 420 $\pm$ 75                      | 5.057 $\pm$ 3.443                 | 3.127333 $\pm$ 0.011477                         | 99.46                | 93.43 $\pm$ 0.33 |                    | 91.91       | YES     |
| NAH8727              | 2                | 227502 $\pm$ 591                  | 71868 $\pm$ 157                   | 854 $\pm$ 15                      | 309 $\pm$ 60                      | 6.532 $\pm$ 3.693                 | 3.138206 $\pm$ 0.015379                         | 99.14                | 93.74 $\pm$ 0.45 |                    | 100.16      | YES     |
| NAH8730              | 9                | 89270 $\pm$ 232                   | 27613 $\pm$ 63                    | 332 $\pm$ 7                       | 131 $\pm$ 89                      | 2.072 $\pm$ 2.922                 | 3.210328 $\pm$ 0.031617                         | 99.30                | 95.84 $\pm$ 0.92 |                    | 90.71       |         |

Plateau age (6 of 8): **93.44  $\pm$  0.16**  
 Inverse isochron age (6 of 8): **93.30  $\pm$  2.80**  
 $(^{40}\text{Ar}/^{36}\text{Ar})_{\text{trapped}}$  intercept: **396  $\pm$  350**  
 Integrated age (8 of 8): **93.71  $\pm$  0.18**

| Sample:<br>Material: | NC-D<br>sanidine |                                     |                                     |                                     |                                     |                                     |                                                       |                     |               |           |        |  | Included in |
|----------------------|------------------|-------------------------------------|-------------------------------------|-------------------------------------|-------------------------------------|-------------------------------------|-------------------------------------------------------|---------------------|---------------|-----------|--------|--|-------------|
|                      | Laser            | <sup>40</sup> Ar ± 2σ <sub>40</sub> | <sup>39</sup> Ar ± 2σ <sub>39</sub> | <sup>38</sup> Ar ± 2σ <sub>38</sub> | <sup>37</sup> Ar ± 2σ <sub>37</sub> | <sup>36</sup> Ar ± 2σ <sub>36</sub> |                                                       |                     |               |           |        |  |             |
| File                 | Power (%)        | (cps) (cps)                         | <sup>40</sup> Ar*/ <sup>39</sup> Ar <sub>K</sub> ± 2σ | % <sup>40</sup> Ar* | Age (Ma)      | ± 2σ (Ma) | K/Ca   |  | plateau     |
| NAH8736              | 0.35             | 36571 ± 102                         | 10605 ± 39                          | 126 ± 5                             | 32 ± 73                             | 4.862 ± 2.992                       | 3.311401 ± 0.084236                                   | 96.02               | 98.78 ± 2.45  |           | 143.14 |  |             |
| NAH8739              | 0.42             | 29870 ± 93                          | 9287 ± 33                           | 112 ± 5                             | 33 ± 56                             | 1.473 ± 3.078                       | 3.168800 ± 0.098956                                   | 98.52               | 94.64 ± 2.88  |           | 120.19 |  |             |
| NAH8741              | 0.47             | 25794 ± 98                          | 8132 ± 36                           | 102 ± 5                             | 38 ± 76                             | 0.285 ± 2.982                       | 3.161457 ± 0.109497                                   | 99.67               | 94.42 ± 3.19  |           | 91.97  |  |             |
| NAH8743              | 0.52             | 61398 ± 165                         | 15165 ± 46                          | 193 ± 6                             | 87 ± 65                             | 36.992 ± 3.937                      | 3.320342 ± 0.077555                                   | 82.01               | 99.04 ± 2.25  |           | 74.54  |  |             |
| NAH8745              | 0.6              | 120838 ± 280                        | 38745 ± 68                          | 472 ± 9                             | 194 ± 68                            | 2.976 ± 3.032                       | 3.095719 ± 0.023386                                   | 99.26               | 92.51 ± 0.68  |           | 85.66  |  |             |
| NAH8747              | 0.8              | 364970 ± 778                        | 116804 ± 121                        | 1418 ± 13                           | 576 ± 68                            | 1.727 ± 2.925                       | 3.120078 ± 0.007516                                   | 99.85               | 93.22 ± 0.22  |           | 87.15  |  |             |
| NAH8749              | 2                | 249940 ± 580                        | 79547 ± 130                         | 961 ± 11                            | 323 ± 60                            | 2.107 ± 3.260                       | 3.133905 ± 0.012270                                   | 99.74               | 93.62 ± 0.36  |           | 105.96 |  |             |
| NAH8752              | 9                | 116005 ± 272                        | 36168 ± 73                          | 437 ± 8                             | 178 ± 61                            | 8.570 ± 2.719                       | 3.136492 ± 0.022467                                   | 97.79               | 93.69 ± 0.65  |           | 87.56  |  |             |
| NAH8755              | 16               | 6728 ± 61                           | 1584 ± 17                           | 20 ± 3                              | 4 ± 76                              | 6.594 ± 3.187                       | 3.003233 ± 0.600780                                   | 70.73               | 89.81 ± 17.53 |           | 156.68 |  |             |

| no plateau               |                  |                                     |                                     |                                     |                                     |                                     |                                                       |                     |                                                                     |              |            |     |              |
|--------------------------|------------------|-------------------------------------|-------------------------------------|-------------------------------------|-------------------------------------|-------------------------------------|-------------------------------------------------------|---------------------|---------------------------------------------------------------------|--------------|------------|-----|--------------|
| Integrated age (8 of 8): |                  |                                     |                                     |                                     |                                     |                                     |                                                       |                     |                                                                     |              |            |     | 93.81 ± 0.27 |
| Sample:<br>Material:     | NC-D<br>sanidine |                                     |                                     |                                     |                                     |                                     |                                                       |                     |                                                                     |              |            |     | Included in  |
|                          | Laser            | <sup>40</sup> Ar ± 2σ <sub>40</sub> | <sup>39</sup> Ar ± 2σ <sub>39</sub> | <sup>38</sup> Ar ± 2σ <sub>38</sub> | <sup>37</sup> Ar ± 2σ <sub>37</sub> | <sup>36</sup> Ar ± 2σ <sub>36</sub> |                                                       |                     |                                                                     |              |            |     |              |
| File                     | Power (%)        | (cps) (cps)                         | <sup>40</sup> Ar*/ <sup>39</sup> Ar <sub>K</sub> ± 2σ | % <sup>40</sup> Ar* | Age (Ma)                                                            | ± 2σ (Ma)    | K/Ca       |     | plateau      |
| NAH8758                  | 0.4              | 142258 ± 337                        | 43625 ± 79                          | 525 ± 8                             | 169 ± 72                            | 13.923 ± 3.714                      | 3.165407 ± 0.025432                                   | 97.07               | 94.54 ± 0.74                                                        |              | 111.28     |     |              |
| NAH8761                  | 0.46             | 182779 ± 426                        | 57682 ± 97                          | 705 ± 10                            | 228 ± 49                            | 5.547 ± 2.715                       | 3.139821 ± 0.014084                                   | 99.09               | 93.79 ± 0.41                                                        |              | 108.93     | YES |              |
| NAH8763                  | 0.52             | 227176 ± 531                        | 71875 ± 151                         | 865 ± 12                            | 313 ± 54                            | 6.491 ± 4.078                       | 3.133581 ± 0.016968                                   | 99.14               | 93.61 ± 0.49                                                        |              | 98.79      | YES |              |
| NAH8765                  | 0.6              | 142906 ± 350                        | 45251 ± 96                          | 542 ± 12                            | 254 ± 60                            | 5.374 ± 3.191                       | 3.122521 ± 0.021082                                   | 98.87               | 93.29 ± 0.61                                                        |              | 76.61      | YES |              |
| NAH8767                  | 0.8              | 79730 ± 216                         | 25193 ± 69                          | 309 ± 8                             | 157 ± 55                            | 1.301 ± 3.276                       | 3.149291 ± 0.038842                                   | 99.51               | 94.07 ± 1.13                                                        |              | 69.17      | YES |              |
| NAH8769                  | 1.5              | 35456 ± 128                         | 11084 ± 50                          | 131 ± 5                             | 74 ± 57                             | 0.247 ± 2.897                       | 3.192190 ± 0.078042                                   | 99.79               | 95.32 ± 2.27                                                        |              | 64.73      | YES |              |
| NAH8771                  | 5                | 41432 ± 138                         | 12931 ± 48                          | 156 ± 7                             | 81 ± 45                             | 4.430 ± 3.005                       | 3.101673 ± 0.069388                                   | 96.81               | 92.68 ± 2.02                                                        |              | 68.75      | YES |              |
| NAH8774                  | 15               | 4225 ± 54                           | 841 ± 14                            | 12 ± 4                              | 22 ± 45                             | 5.193 ± 3.289                       | 3.182512 ± 1.168346                                   | 63.33               | 95.03 ± 34.00                                                       |              | 16.40      | YES |              |
|                          |                  |                                     |                                     |                                     |                                     |                                     |                                                       |                     | Plateau age (7 of 8):                                               | 93.66 ± 0.27 | MSWD: 0.92 |     |              |
|                          |                  |                                     |                                     |                                     |                                     |                                     |                                                       |                     | Inverse isochron age (7 of 8):                                      | 93.80 ± 1.80 |            |     |              |
|                          |                  |                                     |                                     |                                     |                                     |                                     |                                                       |                     | ( <sup>40</sup> Ar/ <sup>36</sup> Ar) <sub>trapped</sub> intercept: | 268 ± 210    |            |     |              |
|                          |                  |                                     |                                     |                                     |                                     |                                     |                                                       |                     | Integrated age (8 of 8):                                            | 93.82 ± 0.30 |            |     |              |

The isotope values in this table have been corrected for system blanks, source mass bias, detector efficiency, and decay of <sup>37</sup>Ar and <sup>39</sup>Ar

Instrument: Noblesse 5-collector mass spectrometer (Jicha et al., 2016)  
Standard: Fish Canyon sanidine  
Standard age (Ma): 28.201 ± 0.046 Kuiper et al. (2008)  
J-value: 0.01674374 ± 0.00000348 (1σ) \*J value is the same for all 3 samples because they were in the same, small irradiation position

Atmospheric argon ratios

|                                    |                 |                   |
|------------------------------------|-----------------|-------------------|
| <sup>40</sup> Ar/ <sup>36</sup> Ar | 298.56 ± 0.31   | Lee et al. (2006) |
| <sup>38</sup> Ar/ <sup>36</sup> Ar | 0.1885 ± 0.0003 | Lee et al. (2006) |

Interfering isotope production ratios

|                                                     |                      |                      |
|-----------------------------------------------------|----------------------|----------------------|
| ( <sup>40</sup> Ar/ <sup>39</sup> Ar) <sub>K</sub>  | 0.00054 ± 0.00014    | Jicha & Brown (2014) |
| ( <sup>38</sup> Ar/ <sup>39</sup> Ar) <sub>K</sub>  | 0.01210 ± 0.00002    | Jicha & Brown (2014) |
| ( <sup>39</sup> Ar/ <sup>37</sup> Ar) <sub>Ca</sub> | 0.000695 ± 0.00001   | Renne et al. (2013)  |
| ( <sup>38</sup> Ar/ <sup>37</sup> Ar) <sub>Ca</sub> | 0.0000196 ± 0.000001 | Renne et al. (2013)  |
| ( <sup>36</sup> Ar/ <sup>37</sup> Ar) <sub>Ca</sub> | 0.000265 ± 0.00002   | Renne et al. (2013)  |

Decay constants

|                                    |                                                     |                     |
|------------------------------------|-----------------------------------------------------|---------------------|
| I <sub>40Ar</sub>                  | (0.580 ± 0.014) x 10 <sup>-10</sup> a <sup>-1</sup> | Min et al. (2000)   |
| I <sub>B<sup>-</sup></sub>         | (4.884 ± 0.099) x 10 <sup>-10</sup> a <sup>-1</sup> | Min et al. (2000)   |
| <sup>39</sup> Ar                   | 0.000007068 1/days                                  |                     |
| <sup>37</sup> Ar                   | 0.01975 1/days                                      |                     |
| <sup>36</sup> Cl                   | 6.308E-09 1/days                                    |                     |
| <sup>36</sup> Cl/ <sup>38</sup> Cl | 263                                                 | Renne et al. (2008) |

**Table S5. Complete Ar data for samples 90-O-34 and K-07-01C**

<

[illegible]

**Notes:**

<sup>1</sup>Corrected: Isotopic intensities corrected for blank, baseline, radioactivity decay and detector intercalibration, not for interfering reactions<sup>3</sup>Time interval (days) between end of irradiation and beginning of analysis.

X symbol preceding sample ID denotes analyses excluded from weighted-mean age calculations.

Errors quoted for individual analyses include analytical error on

Decay constants and isotopic abundances after Min et al. (2000)

## Supplemental References

- Barker, I. R., Moser, D. E., Kamo, S. L., and Plint, A. G., 2011, High-precision U–Pb zircon ID–TIMS dating of two regionally extensive bentonites: Cenomanian Stage, Western Canada Foreland Basin: Canadian Journal of Earth Sciences, v. 48, no. 2, p. 543–556, <https://doi.org/10.1139/E10-042>.
- Brett, C. E., 1995, Sequence stratigraphy, biostratigraphy, and taphonomy in shallow marine environments: Palaeos, v. 10, p. 597–616, <https://doi.org/10.2307/3515097>.
- Cobban, W. A., and Scott, G. R., 1972, Stratigraphy and ammonite fauna of the Graneros Shale and Greenhorn Limestone near Pueblo, Colorado: U.S. Geological Survey Professional Paper 645, 108 p., <https://doi.org/10.3133/pp645>.
- Du Vivier, A. D. C., Selby, D., Sageman, B. B., Jarvis, I., Groecke, D. R., and Voigt, S., 2014, Marine Os-187/Os-188 isotope stratigraphy reveals the interaction of volcanism and ocean circulation during Oceanic Anoxic Event 2: Earth and Planetary Science Letters, v. 389, p. 23–33, <http://dx.doi.org/10.1016/j.epsl.2013.12.024>.
- Eicher, D. L., and Diner, R., 1989, Origin of the cretaceous bridge creek cycles in the western interior, United States: Palaeogeography, Palaeoclimatology, Palaeoecology, v. 74, no. 1, p. 127–146, [https://doi.org/10.1016/0031-0182\(89\)90023-0](https://doi.org/10.1016/0031-0182(89)90023-0).
- Elder, W. P., 1988, Geometry of Upper Cretaceous bentonite beds: Implications about volcanic source areas and paleowind patterns, western interior, United States: Geology, v. 16, no. 9, p. 835–838, [https://doi.org/10.1130/0091-7613\(1988\)016%3C0835:GOUCBB%3E2.3.CO;2](https://doi.org/10.1130/0091-7613(1988)016%3C0835:GOUCBB%3E2.3.CO;2).
- Elder, W. P., 1989, Molluscan extinction patterns across the Cenomanian-Turonian Stage boundary in the Western Interior of the United States: Paleobiology, v. 15, no. 3, p. 299–320, <https://doi.org/10.1017/S0094837300009465>.
- Elder, W. P., Gustason, E. R., and Sageman, B. B., 1994, Correlation of basinal carbonate cycles to nearshore parasequences in the Late Cretaceous Greenhorn seaway, Western Interior U.S.A: Geological Society of America Bulletin, v. 106, no. 7, p. 892–902, [https://doi.org/10.1130/0016-7606\(1994\)106%3C0892:COBCCT%3E2.3.CO;2](https://doi.org/10.1130/0016-7606(1994)106%3C0892:COBCCT%3E2.3.CO;2).
- Elder, W. P., and Kirkland, J. I., 1985, Stratigraphy and Depositional Environments of the Bridge Creek Limestone Member of the Greenhorn Limestone at Rock Canyon Anticline Near Pueblo, Colorado, in Pratt, L. M., Kauffman, E. G., and Zelt, F. B., eds., Fine-Grained Deposits and Biofacies of the Cretaceous Western Interior Seaway: Evidence of Cyclic Sedimentary Processes, SEPM Society for Sedimentary Geology, p.122–134, <https://doi.org/10.2110/sepmfg.04.122>.
- Eldrett, J. S., Ma, C., Bergman, S. C., Lutz, B., Gregory, F. J., Dodsworth, P., Phipps, M., Hardas, P., Minisini, D., Ozkan, A., Ramezani, J., Bowring, S. A., Kamo, S. L., Ferguson, K., Macaulay, C., and Kelly, A. E., 2015, An astronomically calibrated stratigraphy of the Cenomanian, Turonian and earliest Coniacian from the Cretaceous Western Interior Seaway, USA: Implications for global chronostratigraphy: Cretaceous Research, v. 56, p. 316–344, <https://doi.org/10.1016/j.cretres.2015.04.010>.
- Kennedy, W.J., Walaszczyk, I., and Cobban, W.A., 2000, Pueblo, Colorado, USA, candidate Global Boundary Stratotype Section and Point for the base of the Turonian Stage of the Cretaceous, and for the base of the Middle Turonian Substage, with a revision of the *Inoceramidae* (Bivalvia): Acta Geologica Polonica, v. 50, no. 3, p. 295–334.

- Kennedy, W. J., Walaszczyk, I., and Cobban, W. A., 2005, The global boundary stratotype section and point for the base of the Turonian stage of the Cretaceous: Pueblo, Colorado, USA: *Episodes*, v. 28, no. 2, p. 93-104.
- Kirkland, J.I., 1991, Lithostratigraphic and biostratigraphic framework for the Mancos Shale (Late Cenomanian to Middle Turonian) at Black Mesa, northeastern Arizona, *in* Nations, J.D., and Eaton, J.G., eds., *Stratigraphy, Depositional Environments, and Sedimentary Tectonics of the Western Margin, Cretaceous Western Interior Seaway*: Geological Society of America Special Paper 260, p. 85–111, <https://doi.org/10.1130/SPE260-p85>.
- Jicha, B. R., Singer, B. S., and Sobol, P., 2016, Re-evaluation of the ages of  $^{40}\text{Ar}/^{39}\text{Ar}$  sanidine standards and supereruptions in the western U.S. using a Noblesse multi-collector mass spectrometer: *Chemical Geology*, v. 431, p. 54-66, <https://doi.org/10.1016/j.chemgeo.2016.03.024>.
- Jicha, B. R., and Brown, F. H., 2014, An age for the Korath Range, Ethiopia and the viability of  $^{40}\text{Ar}/^{39}\text{Ar}$  dating of kaersutite in Late Pleistocene volcanics: *Quaternary Geochronology*, v. 21, p. 53-57 <https://doi.org/10.1016/j.quageo.2013.03.007>.
- Jones, M. M., Sageman, B. B., Oakes, R. L., Parker, A. L., Leckie, R. M., Bralower, T. J., Sepúlveda, J., and Fortiz, V., 2019, Astronomical pacing of relative sea level during Oceanic Anoxic Event 2: Preliminary studies of the expanded SH#1 Core, Utah, USA: *GSA Bulletin*, v. 131, no. 9-10, p. 1702-1722, <https://doi.org/10.1130/B32057.1>.
- Joo, Y. J., and Sageman, B. B., 2014, Cenomanian to Campanian carbon isotope chemostratigraphy from the Western Interior Basin, USA: *Journal of Sedimentary Research*, v. 84, no. 7, p. 529-542, <https://doi.org/10.2110/jsr.2014.38>.
- Kuiper, K. F., Deino, A., Hilgen, F. J., Krijgsman, W., Renne, P. R., and Wijbrans, J. R., 2008, Synchronizing Rock Clocks of Earth History: *Science*, v. 320, no. 5875, p. 500-504, DOI: 10.1126/science.1154339.
- Laurin, J., Barclay, R. S., Sageman, B. B., Dawson, R. R., Pagani, M., Schmitz, M., Eaton, J., McNerney, F. A., and McElwain, J. C., 2019, Terrestrial and marginal-marine record of the mid-Cretaceous Oceanic Anoxic Event 2 (OAE 2): High-resolution framework, carbon isotopes,  $\text{CO}_2$  and sea-level change: *Palaeogeography, Palaeoclimatology, Palaeoecology*, v. 524, p. 118-136, <https://doi.org/10.1016/j.palaeo.2019.03.019>.
- Lee, J., Marti, K., Severinghaus, J. P., Kawamura, K., Yoo, H., Lee, J. B., Kim, J. S., 2006, A redetermination of the isotopic abundances of atmospheric Ar: *Geochimica et Cosmochimica Acta*, v. 70, no. 17, p. 4507-4512, <https://doi.org/10.1016/j.gca.2006.06.1563>.
- Ma, C., Meyers, S. R., Sageman, B. B., Singer, B. S., and Jicha, B. R., 2014, Testing the astronomical time scale for oceanic anoxic event 2, and its extension into Cenomanian strata of the Western Interior Basin (USA): *Geological Society of America Bulletin*, v. 126, no. 7-8, p. 974-989, <https://doi.org/10.1130/B30922.1>.
- Meyers, S.R., Sageman, B.B., and Hinnov, L.A., 2001, Integrated quantitative stratigraphy of the Cenomanian- Turonian Bridge Creek Limestone member using evolutive harmonic analysis and stratigraphic modeling: *Journal of Sedimentary Research*, v. 71, no. 4, p. 628–644, <https://doi.org/10.1306/012401710628>.
- Meyers, S. R., and Sageman, B. B., 2004, Detection, quantification, and significance of hiatuses in pelagic and hemipelagic strata: *Earth and Planetary Science Letters*, v. 224, no. 1-2, p. 55-72, <https://doi.org/10.1016/j.epsl.2004.05.003>.



- Meyers, S. R., Siewert, S. E., Singer, B. S., Sageman, B. B., Condon, D. J., Obradovich, J. D., Jicha, B. R., and Sawyer, D. A., 2012b, Intercalibration of radioisotopic and astrochronologic time scales for the Cenomanian-Turonian boundary interval, Western Interior Basin, USA: *Geology*, v. 40, no. 1, p. 7-10, <https://doi.org/10.1130/G32261.1>.
- Min, K., Mundil, R., Renne, P. R., and Ludwig, K. R., 2000, A test for systematic errors in  $^{40}\text{Ar}/^{39}\text{Ar}$  geochronology through comparison with U/Pb analysis of a 1.1-Ga rhyolite: *Geochimica et Cosmochimica Acta*, v. 64, no. 1, p. 73-98, [https://doi.org/10.1016/S0016-7037\(99\)00204-5](https://doi.org/10.1016/S0016-7037(99)00204-5).
- Pratt, L. M., 1984, Influence of paleoenvironmental factors on preservation of organic matter in Middle Cretaceous Greenhorn Formation, Pueblo, Colorado: *AAPG Bulletin*, v. 68, no. 9, p. 1146-1159, <https://doi.org/10.1306/AD4616E7-16F7-11D7-8645000102C1865D>.
- Renne, P. R., Sharp, Z. D., Heizler, M. T., 2008, Cl-derived argon isotope production in the CLICIT facility of OSTR reactor and the effects of the Cl-correction in  $^{40}\text{Ar}/^{39}\text{Ar}$  geochronology, *Chemical Geology*, v. 255, no. 3-4, p. 463-466, <https://doi.org/10.1016/j.chemgeo.2008.07.014>.
- Sageman, B. B., Meyers, S. R., and Arthur, M. A., 2006, Orbital time scale and new C-isotope record for Cenomanian-Turonian boundary stratotype: *Geology*, v. 34, no. 2, p. 125-128, <https://doi.org/10.1130/G22074.1>.
- Sageman, B. B., Singer, B. S., Meyers, S. R., Siewert, S. E., Walaszczyk, I., Condon, D. J., Jicha, B. R., Obradovich, J. D., and Sawyer, D. A., 2014b, Integrating Ar-40/Ar-39, U-Pb, and astronomical clocks in the Cretaceous Niobrara Formation, Western Interior Basin, USA: *Geological Society of America Bulletin*, v. 126, no. 7-8, p. 956-973, <https://doi.org/10.1130/B30929.1>.
- Sullivan, D. L., Brandon, A. D., Eldrett, J., Bergman, Minisini, D., S. C., Wright, S. (in press) High Resolution Osmium Data Record Three Distinct Pulses of Magmatic Activity During Cretaceous Ocean Anoxic Event 2 (OAE 2): *Geochimica et Cosmochimica Acta*, <https://doi.org/10.1016/j.gca.2020.04.002>.
- Tibert, N. E., Leckie, R. M., Eaton, J. G., Kirkland, J. I., Colin, J.-P., Leithold, E. L., and McCormic, M. E., 2003, Recognition of relative sea-level change in Upper Cretaceous coal-bearing strata: a paleoecological approach using agglutinated foraminifera and ostracodes to detect key stratigraphic surfaces, in C, O. H., and Leckie, R. M., eds., *Micropaleontologic proxies for sea-level change and stratigraphic discontinuities*, Volume 75, Society for Sedimentary Geology, p. 263-299, <https://doi.org/10.2110/pec.03.75.0263>.
- Uličný, D., 1999, Sequence stratigraphy of the Dakota Formation (Cenomanian), southern Utah: interplay of eustasy and tectonics in a foreland basin: *Sedimentology*, v. 46, no. 5, p. 807-836, <https://doi.org/10.1046/j.1365-3091.1999.00252.x>.
